# Supplementary material for: Analyzing and interpreting spatial and temporal variability of the United States county population distributions using Taylor's law
Source: PLoS One. 2019 Dec 11;14(12):e0226096. doi: 10.1371/journal.pone.0226096 (PMC6905577; doi:10.1371/journal.pone.0226096)
Supplement: S1 Table — (XLSX) [file pone.0226096.s053.xlsx]

## Sheet: sheet1
Table S1. Ordinary least-squares (ols) linear regression statistics of spatial hierarchical Taylor's law, using count and density separately. N is the number of mean-variance pairs (states) in each census. est is the point estimate of slope or intercept. std err is the standard error. p is the p-value of a test of the null hypothesis that the slope or intercept is zero. Bold font indicates that p…
variable	year	N	linear model (OLS)
			slope			intercept			adj.R2	1-adj.R2
			est	std err	p	est	std err	p
count	1790	14	2.1568	1.1961	0.0965	-1.2351	5.0729	0.8117	0.1476	0.8524
	1800	19	1.9604	0.2879	<0.0001*	-0.4531	1.1753	0.7046	0.716	0.284
	1810	24	1.9631	0.2591	<0.0001*	-0.4133	1.0446	0.6962	0.7103	0.2897
	1820	26	1.5217	0.1708	<0.0001*	1.4722	0.692	0.0438	0.7581	0.2419
	1830	28	1.6474	0.15	<0.0001*	0.9744	0.6104	0.1225	0.8159	0.1841
	1840	30	1.7149	0.1607	<0.0001*	0.7873	0.6582	0.2417	0.7956	0.2044
	1850	36	1.8237	0.1419	<0.0001*	0.4188	0.5792	0.4746	0.8243	0.1757
	1860	38	1.7684	0.1396	<0.0001*	0.7298	0.5741	0.2118	0.8117	0.1883
	1870	46	1.9914	0.1141	<0.0001*	-0.1078	0.4639	0.8174	0.8709	0.1291
	1880	47	2.0343	0.138	<0.0001*	-0.3062	0.5797	0.5999	0.8246	0.1754
	1890	49	2.1232	0.1685	<0.0001*	-0.6024	0.7207	0.4075	0.7668	0.2332
	1900	51	2.2634	0.2286	<0.0001*	-1.2434	0.9994	0.2194	0.6599	0.3401
	1910	49	2.4442	0.1939	<0.0001*	-1.9694	0.8648	0.0274	0.7669	0.2331
	1920	50	2.4388	0.1866	<0.0001*	-1.8804	0.8385	0.0296	0.7761	0.2239
	1930	50	2.3421	0.1795	<0.0001*	-1.3715	0.8166	0.0996	0.7755	0.2245
	1940	50	2.2788	0.1734	<0.0001*	-1.0626	0.7948	0.1875	0.778	0.222
	1950	50	2.1113	0.1556	<0.0001*	-0.2043	0.7228	0.7787	0.7889	0.2111
	1960	50	1.9632	0.1353	<0.0001*	0.5741	0.6366	0.3716	0.8104	0.1896
	1970	50	1.8721	0.1273	<0.0001*	1.0309	0.6057	0.0952	0.8146	0.1854
	1980	50	1.8273	0.1279	<0.0001*	1.2222	0.6166	0.0532	0.8056	0.1944
	1990	50	1.7893	0.1247	<0.0001*	1.4193	0.6055	0.0233	0.807	0.193
	2000	50	1.7755	0.1239	<0.0001*	1.4972	0.6084	0.0175	0.8065	0.1935
	2010	51	1.7466	0.1226	<0.0001*	1.6446	0.6062	0.0092	0.8015	0.1985
density	1790	14	2.5244	0.514614	0.0004*	-0.862478	0.56351	0.151808	0.639521	0.360479
	1800	19	2.29216	0.243527	<0.0001*	-0.410505	0.266702	0.142163	0.829532	0.170468
	1810	24	2.25703	0.196402	<0.0001*	-0.286662	0.230505	0.226727	0.850711	0.149289
	1820	26	2.3178	0.195648	<0.0001*	-0.338097	0.215989	0.130594	0.847882	0.152118
	1830	28	2.30568	0.185034	<0.0001*	-0.352573	0.226084	0.130975	0.851054	0.148946
	1840	30	2.24327	0.176345	<0.0001*	-0.409676	0.207082	0.0578065	0.847225	0.152775
	1850	36	2.05846	0.128727	<0.0001*	-0.1351	0.153955	0.386356	0.879188	0.120812
	1860	38	2.19881	0.155694	<0.0001*	-0.156441	0.186683	0.40756	0.842853	0.157147
	1870	46	2.11489	0.106488	<0.0001*	0.0107515	0.124031	0.931316	0.897361	0.102639
	1880	47	2.23103	0.108444	<0.0001*	-0.0870402	0.136994	0.528412	0.901762	0.0982377
	1890	49	2.2865	0.118538	<0.0001*	-0.0764098	0.152971	0.619754	0.885461	0.114539
	1900	51	2.40763	0.113787	<0.0001*	-0.268379	0.154518	0.0886927	0.899337	0.100663
	1910	49	2.39895	0.141807	<0.0001*	-0.212837	0.204457	0.303209	0.855935	0.144065
	1920	50	2.3324	0.12188	<0.0001*	-0.0700756	0.180442	0.69947	0.881706	0.118294
	1930	50	2.29471	0.115357	<0.0001*	0.0297611	0.17588	0.866341	0.889566	0.110434
	1940	50	2.26694	0.113762	<0.0001*	0.0729693	0.175668	0.679713	0.889909	0.110091
	1950	50	2.24831	0.11009	<0.0001*	0.144526	0.174637	0.412005	0.894641	0.105359
	1960	50	2.1044	0.114273	<0.0001*	0.411005	0.185924	0.0318619	0.873428	0.126572
	1970	50	2.04616	0.108806	<0.0001*	0.500958	0.181286	0.00808834	0.878002	0.121998
	1980	50	2.013	0.10958	<0.0001*	0.515716	0.186188	0.00795075	0.872881	0.127119
	1990	50	1.9748	0.105839	<0.0001*	0.572191	0.182379	0.0029113	0.876306	0.123694
	2000	50	1.94788	0.104292	<0.0001*	0.609427	0.184156	0.0017795	0.876524	0.123476
	2010	51	1.89424	0.0992564	<0.0001*	0.690033	0.180552	0.00037423	0.878996	0.121004
