# Supplementary material for: Analyzing and interpreting spatial and temporal variability of the United States county population distributions using Taylor's law
Source: PLoS One. 2019 Dec 11;14(12):e0226096. doi: 10.1371/journal.pone.0226096 (PMC6905577; doi:10.1371/journal.pone.0226096)
Supplement: S2 Table — (XLSX) [file pone.0226096.s054.xlsx]

## Sheet: Sheet1
Table S2. Ordinary least-squares (ols) quadratic regression statistics of spatial hierarchical quadratic Taylor's law, using count and density separately. Regression p records the p-value of each fitted quadratic regression. Other notations are defined in the caption of Table S1.
variable	year	N	quadratic model (OLS)
			quadratic coefficient			slope			intercept			regression	adj.R2	1-adj.R2
			est	std err	p	est	std err	p	est	std err	p	p
count	1790	14	3.61988	4.00827	0.385821	-28.6968	34.1852	0.419086	64.3	72.8	0.396	0.18	0.134	0.866
	1800	19	0.202945	0.567513	0.725313	0.34703	4.52128	0.93977	2.72	8.96	0.765	<0.0001*	0.701	0.299
	1810	24	0.565919	0.499694	0.270177	-2.53523	3.98022	0.531037	8.44	7.88	0.297	<0.0001*	0.714	0.286
	1820	26	-0.26937	0.399589	0.506956	3.64334	3.15209	0.259609	-2.66	6.47	0.67	<0.0001*	0.752	0.248
	1830	28	-0.362862	0.343096	0.300347	4.5132	2.71385	0.108796	-4.62	5.32	0.394	<0.0001*	0.817	0.183
	1840	30	0.0660305	0.357416	0.85481	1.18777	2.85812	0.681005	1.83	5.68	0.75	<0.0001*	0.788	0.212
	1850	36	0.129157	0.241283	0.596038	0.812434	1.89462	0.670847	2.37	3.69	0.525	<0.0001*	0.821	0.179
	1860	38	0.232482	0.212211	0.280768	-0.0555735	1.67075	0.973654	4.25	3.26	0.201	<0.0001*	0.813	0.187
	1870	46	0.0983709	0.20449	0.632916	1.20962	1.62927	0.461865	1.42	3.21	0.66	<0.0001*	0.869	0.131
	1880	47	0.400463	0.244926	0.109176	-1.29347	2.03978	0.529284	6.53	4.22	0.129	<0.0001*	0.831	0.169
	1890	49	0.298176	0.334162	0.376871	-0.4424	2.88024	0.878598	4.87	6.18	0.434	<0.0001*	0.766	0.234
	1900	51	0.240023	0.453015	0.598669	0.139642	4.01487	0.972398	3.42	8.86	0.701	<0.0001*	0.655	0.345
	1910	49	-0.254379	0.430644	0.557617	4.7706	3.94328	0.232535	-7.25	8.99	0.424	<0.0001*	0.764	0.236
	1920	50	-0.39234	0.373493	0.298877	6.0352	3.4287	0.08488	-10.1	7.84	0.205	<0.0001*	0.777	0.223
	1930	50	-0.464332	0.365273	0.209916	6.64359	3.38851	0.0558647	-11.3	7.82	0.157	<0.0001*	0.778	0.222
	1940	50	-0.436225	0.364687	0.237633	6.34436	3.40319	0.0685407	-10.5	7.9	0.192	<0.0001*	0.78	0.22
	1950	50	-0.426482	0.337608	0.212731	6.13476	3.18878	0.0604405	-9.63	7.49	0.205	<0.0001*	0.791	0.209
	1960	50	-0.494982	0.287389	0.0915831	6.68214	2.74303	0.0186937	-10.6	6.51	0.111	<0.0001*	0.818	0.182
	1970	50	-0.485167	0.261423	0.0697485	6.54159	2.51912	0.0125222	-10.1	6.03	0.1	<0.0001*	0.824	0.176
	1980	50	-0.426706	0.272041	0.123466	5.9738	2.64654	0.0286828	-8.78	6.4	0.177	<0.0001*	0.811	0.189
	1990	50	-0.360172	0.257909	0.169121	5.30748	2.52232	0.040737	-7.11	6.14	0.253	<0.0001*	0.811	0.189
	2000	50	-0.267528	0.255083	0.29964	4.40827	2.51336	0.08596	-4.93	6.16	0.427	<0.0001*	0.807	0.193
	2010	51	-0.167994	0.253563	0.510799	3.41127	2.51563	0.181435	-2.45	6.21	0.695	<0.0001*	0.799	0.201
density	1790	14	2.00643	1.20551	0.124231	-1.51726	2.47538	0.552379	0.882417	1.17295	0.46766	0.0007*	0.685861	0.314139
	1800	19	0.463049	0.226117	0.0573576	1.98726	0.268502	<0.0001*	-0.716628	0.286752	0.0237161	<0.0001*	0.856492	0.143508
	1810	24	0.176271	0.164215	0.295263	1.99828	0.310513	<0.0001*	-0.30083	0.23009	0.205196	<0.0001*	0.851737	0.148263
	1820	26	0.380287	0.179219	0.044832	1.87085	0.278874	<0.0001*	-0.423635	0.205755	0.0509997	<0.0001*	0.867254	0.132746
	1830	28	0.238325	0.168068	0.168528	1.81399	0.391393	0.0001*	-0.223074	0.239878	0.36129	<0.0001*	0.856628	0.143372
	1840	30	0.334466	0.167586	0.0561361	1.47543	0.419667	0.0016*	-0.112274	0.2469	0.652936	<0.0001*	0.861934	0.138066
	1850	36	0.231438	0.089203	0.0140223	1.65663	0.195364	<0.0001*	-0.10752	0.142814	0.456869	<0.0001*	0.896616	0.103384
	1860	38	0.437012	0.126902	0.0015*	1.36533	0.277854	<0.0001*	0.00848849	0.170494	0.960575	<0.0001*	0.87927	0.12073
	1870	46	0.126616	0.0865222	0.150632	1.98587	0.137208	<0.0001*	-0.0603425	0.131738	0.649223	<0.0001*	0.899956	0.100044
	1880	47	0.146086	0.0826345	0.0840196	2.04687	0.148596	<0.0001*	-0.153749	0.139086	0.274981	<0.0001*	0.906193	0.0938072
	1890	49	0.132773	0.0891777	0.143349	2.08585	0.178493	<0.0001*	-0.0965016	0.15163	0.527653	<0.0001*	0.888352	0.111648
	1900	51	0.0720505	0.0881938	0.41799	2.26697	0.206594	<0.0001*	-0.246265	0.15739	0.124229	<0.0001*	0.898649	0.101351
	1910	49	0.178262	0.148783	0.237001	1.92161	0.422665	<0.0001*	0.0245165	0.284013	0.931585	<0.0001*	0.857258	0.142742
	1920	50	0.107684	0.0914803	0.245073	2.08486	0.242814	<0.0001*	0.00903006	0.191875	0.962663	<0.0001*	0.882649	0.117351
	1930	50	0.0651612	0.0880578	0.462991	2.14102	0.237848	<0.0001*	0.0812152	0.189903	0.670848	<0.0001*	0.888515	0.111485
	1940	50	0.0617218	0.0898817	0.495646	2.11551	0.248427	<0.0001*	0.130277	0.195364	0.508134	<0.0001*	0.888684	0.111316
	1950	50	-0.00605006	0.0913155	0.947456	2.26409	0.262945	<0.0001*	0.13754	0.205577	0.506742	<0.0001*	0.892409	0.107591
	1960	50	0.0185813	0.124553	0.882047	2.04806	0.394897	<0.0001*	0.445244	0.296581	0.139977	<0.0001*	0.870796	0.129204
	1970	50	-0.0492088	0.122907	0.690695	2.20038	0.40053	<0.0001*	0.401912	0.307649	0.197774	<0.0001*	0.87583	0.12417
	1980	50	-0.0640289	0.130227	0.625239	2.21975	0.43477	<0.0001*	0.373798	0.344292	0.283149	<0.0001*	0.87084	0.12916
	1990	50	-0.0595292	0.125081	0.636333	2.16897	0.421714	<0.0001*	0.436737	0.338838	0.203732	<0.0001*	0.87428	0.12572
	2000	50	-0.0387811	0.121789	0.751571	2.07661	0.417733	<0.0001*	0.517088	0.344455	0.139999	<0.0001*	0.874169	0.125831
	2010	51	-0.028982	0.117268	0.805852	1.99247	0.409937	<0.0001*	0.617742	0.344668	0.0793916	<0.0001*	0.876632	0.123368
