# Supplementary material for: Analyzing and interpreting spatial and temporal variability of the United States county population distributions using Taylor's law
Source: PLoS One. 2019 Dec 11;14(12):e0226096. doi: 10.1371/journal.pone.0226096 (PMC6905577; doi:10.1371/journal.pone.0226096)
Supplement: S3 Table — (XLSX) [file pone.0226096.s055.xlsx]

## Sheet: Sheet1
Table S3. Ordinary least-squares (ols) linear regression statistics of spatial Taylor's law, using count and density separately. N is the number of mean-variance pairs (censuses) in each state. Other notations are defined in the caption of Table S1.
measure	state	N	linear model (OLS)
			slope			intercept			adj.R2	1-adj.R2
			est	std err	p	est	std err	p
count	Alabama	20	3.14567	0.172943	<0.0001*	-5.16788	0.771456	<0.0001*	0.945534	0.0544659
	Alaska	6	2.17989	0.166499	0.0002*	-0.119325	0.703429	0.873532	0.971496	0.028504
	Alaska Territory	7	0.118014	2.13307	0.958022	6.86809	9.14843	0.486617	-0.199266	1.19927
	Arizona	10	2.57408	0.0746641	<0.0001*	-2.44132	0.375157	0.0002*	0.992478	0.00752159
	Arizona Territory	5	1.62981	0.225246	0.00544439	1.08607	0.860719	0.2962	0.927739	0.0722609
	Arkansas	18	2.84278	0.216219	<0.0001*	-3.7873	0.916526	0.0008*	0.909987	0.0900126
	California	17	2.26086	0.0627635	<0.0001*	-0.590823	0.309964	0.0759823	0.98781	0.0121897
	Colorado	14	2.10528	0.13039	<0.0001*	0.197609	0.568228	0.734042	0.952328	0.0476721
	Connecticut	23	2.81963	0.0768567	<0.0001*	-4.63003	0.390041	<0.0001*	0.983905	0.0160946
	Delaware	23	3.54013	0.250311	<0.0001*	-8.26175	1.20795	<0.0001*	0.900463	0.099537
	Florida	17	2.4303	0.0708478	<0.0001*	-1.72899	0.318287	0.0001*	0.986574	0.0134261
	Georgia	23	3.43796	0.170998	<0.0001*	-5.9814	0.717161	<0.0001*	0.948262	0.0517377
	Hawaii	6	1.63226	0.162003	0.0005*	2.22993	0.859759	0.0604501	0.952613	0.0473866
	Hawaii Territory	6	2.18412	0.207647	0.0005*	-1.0527	0.997641	0.350857	0.956384	0.0436158
	Idaho	13	3.27807	0.241614	<0.0001*	-5.28939	1.00501	0.000267165	0.938485	0.0615153
	Illinois	20	3.1672	0.11139	<0.0001*	-4.49174	0.513176	<0.0001*	0.97701	0.0229896
	Indiana	20	3.00814	0.18725	<0.0001*	-4.44169	0.829058	<0.0001*	0.931179	0.0688208
	Iowa	17	2.30879	0.339183	<0.0001*	-1.36312	1.46108	0.36562	0.739134	0.260866
	Kansas	15	3.66726	0.405767	<0.0001*	-6.74191	1.71661	0.00173382	0.852138	0.147862
	Kentucky	22	3.69625	0.117668	<0.0001*	-6.98488	0.496266	<0.0001*	0.979141	0.0208593
	Louisiana	20	2.04705	0.0679109	<0.0001*	0.175547	0.300294	0.566084	0.979495	0.0205049
	Maine	20	3.81134	0.201455	<0.0001*	-8.97024	0.947751	<0.0001*	0.949459	0.0505412
	Maryland	23	2.65189	0.232623	<0.0001*	-2.8886	1.10574	0.0162693	0.854264	0.145736
	Massachusetts	23	2.05424	0.136022	<0.0001*	-0.366881	0.709768	0.610625	0.911674	0.0883258
	Michigan	18	2.84681	0.134466	<0.0001*	-3.33138	0.623544	0.0001*	0.96338	0.0366204
	Minnesota	16	2.59589	0.0908182	<0.0001*	-2.05049	0.399997	0.0002*	0.98195	0.0180503
	Mississippi	20	2.40689	0.228105	<0.0001*	-2.04453	0.971781	0.0497092	0.853098	0.146902
	Missouri	19	3.03034	0.125852	<0.0001*	-3.87155	0.550459	<0.0001*	0.969838	0.0301621
	Montana	13	3.84639	0.469356	<0.0001*	-7.37721	1.91214	0.00266202	0.846466	0.153534
	Nebraska	15	2.71339	0.291045	<0.0001*	-2.32838	1.19356	0.0729739	0.859884	0.140116
	Nevada	15	2.69513	0.0683142	<0.0001*	-2.54884	0.282503	<0.0001*	0.99108	0.00892025
	New Hampshire	23	3.16746	0.218517	<0.0001*	-5.94572	1.02457	<0.0001*	0.904808	0.095192
	New Jersey	23	2.43735	0.120615	<0.0001*	-2.50656	0.597025	0.0004*	0.94876	0.0512404
	New Mexico	10	3.63526	0.217938	<0.0001*	-7.11546	0.972839	0.0001*	0.968557	0.0314431
	New Mexico Territory	7	1.5658	1.23141	0.259467	1.06193	4.90425	0.837131	0.0932241	0.906776
	New York	23	2.71346	0.114536	<0.0001*	-3.21529	0.575719	<0.0001*	0.962216	0.037784
	North Carolina	23	3.10017	0.0487641	<0.0001*	-5.16327	0.212601	<0.0001*	0.994585	0.00541505
	North Dakota	13	1.68138	0.71411	0.0381824	1.30036	2.87774	0.660144	0.274648	0.725352
	Ohio	21	2.87683	0.083114	<0.0001*	-3.89429	0.389678	<0.0001*	0.983567	0.016433
	Oklahoma	11	5.53594	0.804987	0.0001*	-15.6617	3.64114	0.00198682	0.822361	0.177639
	Oregon	16	2.46635	0.126326	<0.0001*	-1.75047	0.559207	0.00737517	0.962042	0.0379576
	Pennsylvania	23	2.57225	0.102312	<0.0001*	-2.45669	0.499236	0.0001*	0.966313	0.0336865
	Rhode Island	23	2.47938	0.0982594	<0.0001*	-2.29573	0.47536	0.0001*	0.96655	0.0334498
	South Carolina	23	2.36578	0.219283	<0.0001*	-1.95119	0.992805	0.0627407	0.839879	0.160121
	South Dakota	13	3.29801	0.778245	0.00139412	-5.06532	3.0852	0.128881	0.585615	0.414385
	Tennessee	22	3.4984	0.0971157	<0.0001*	-6.42778	0.421571	<0.0001*	0.984063	0.0159374
	Texas	17	3.07034	0.0739948	<0.0001*	-4.09404	0.320246	<0.0001*	0.990787	0.00921262
	Utah	12	2.30668	0.0799297	<0.0001*	-0.730184	0.358029	0.0687101	0.986949	0.0130512
	Utah Territory	5	2.06197	0.219553	0.00255734	-0.0644133	0.789637	0.940124	0.956142	0.0438576
	Vermont	23	3.0984	0.214239	<0.0001*	-5.37244	0.94198	<0.0001*	0.904414	0.0955859
	Virginia	23	3.55536	0.252418	<0.0001*	-6.65172	1.08149	<0.0001*	0.899723	0.100277
	Washington	13	2.29623	0.0532746	<0.0001*	-0.858491	0.253052	0.00600775	0.993579	0.00642139
	West Virginia	15	2.94603	0.160196	<0.0001*	-4.3132	0.704278	<0.0001*	0.960137	0.0398634
	Wisconsin	17	2.97519	0.139707	<0.0001*	-4.09784	0.638332	<0.0001*	0.96585	0.0341501
	Wyoming	13	2.36746	0.19412	<0.0001*	-1.68076	0.794715	0.058079	0.924877	0.0751226
density	Alabama	20	2.5574	0.201116	<0.0001*	-0.832898	0.234405	0.0022715	0.894266	0.105734
	Alaska	6	2.01782	0.144522	0.0002*	1.10669	0.0539178	<0.0001*	0.974866	0.0251337
	Alaska Territory	7	2.78629	0.628444	0.006805	0.676646	0.79636	0.434294	0.756663	0.243337
	Arizona	10	2.72143	0.0892499	<0.0001*	-0.227966	0.0723398	0.0135714	0.990403	0.00959715
	Arizona Territory	5	1.96928	0.0715854	0.0001*	-0.353691	0.0558583	0.0079649	0.994735	0.00526474
	Arkansas	18	2.57921	0.206371	<0.0001*	-0.832557	0.205957	0.00094407	0.901277	0.0987231
	California	17	2.20493	0.124988	<0.0001*	1.0006	0.242057	0.000883717	0.950952	0.0490482
	Colorado	14	2.84431	0.130913	<0.0001*	0.193555	0.184754	0.315449	0.973143	0.0268568
	Connecticut	23	3.20758	0.135132	<0.0001*	-2.89746	0.255193	<0.0001*	0.962356	0.0376435
	Delaware	23	2.74831	0.102257	<0.0001*	-1.59222	0.175405	<0.0001*	0.970404	0.0295957
	Florida	17	2.34317	0.0694962	<0.0001*	-0.120677	0.0878858	0.189898	0.986109	0.0138913
	Georgia	23	2.86932	0.121695	<0.0001*	-0.853417	0.150575	<0.0001*	0.961867	0.0381335
	Hawaii	6	1.88743	0.174493	0.0004*	0.662464	0.358676	0.138475	0.958677	0.0413227
	Hawaii Territory	6	2.42734	0.204596	0.0003*	-0.583212	0.312407	0.135326	0.965459	0.0345406
	Idaho	13	2.47268	0.11189	<0.0001*	-0.0263263	0.0796122	0.747098	0.97597	0.0240303
	Illinois	20	3.07873	0.154888	<0.0001*	-0.870878	0.222523	0.00101797	0.954006	0.0459937
	Indiana	20	2.85458	0.184238	<0.0001*	-1.18811	0.267125	0.0003*	0.926375	0.0736251
	Iowa	17	2.16495	0.381824	<0.0001*	-0.254143	0.440226	0.5723	0.660651	0.339349
	Kansas	15	3.52497	0.16225	<0.0001*	-0.825559	0.174245	0.0004*	0.971134	0.0288659
	Kentucky	22	2.93236	0.136154	<0.0001*	-0.987611	0.176562	<0.0001*	0.956598	0.0434021
	Louisiana	20	2.12447	0.13092	<0.0001*	0.792963	0.180478	0.0004*	0.932462	0.0675382
	Maine	20	2.43642	0.0984313	<0.0001*	-0.65936	0.124028	<0.0001*	0.969874	0.0301259
	Maryland	23	2.67887	0.155634	<0.0001*	-0.534325	0.341665	0.13279	0.93066	0.0693404
	Massachusetts	23	2.23318	0.0988549	<0.0001*	0.182268	0.240903	0.457693	0.958595	0.0414054
	Michigan	18	2.84954	0.139399	<0.0001*	-0.58223	0.202167	0.0108845	0.960816	0.0391835
	Minnesota	16	2.56286	0.0890738	<0.0001*	0.267156	0.116506	0.0378443	0.982182	0.017818
	Mississippi	20	1.88515	0.250878	<0.0001*	-0.284734	0.270833	0.307019	0.744842	0.255158
	Missouri	19	3.15597	0.0987805	<0.0001*	-0.373097	0.147737	0.0217828	0.982655	0.0173451
	Montana	13	1.64925	0.343021	0.0005*	0.656775	0.11167	0.0001*	0.648269	0.351731
	Nebraska	15	3.0171	0.219377	<0.0001*	-0.0669867	0.215716	0.76108	0.930743	0.0692569
	Nevada	15	2.14276	0.039151	<0.0001*	0.574134	0.0241061	<0.0001*	0.995346	0.00465357
	New Hampshire	23	2.63886	0.0712482	<0.0001*	-1.25442	0.0968092	<0.0001*	0.984204	0.0157957
	New Jersey	23	2.53116	0.0886233	<0.0001*	-0.909488	0.203659	0.0002*	0.973707	0.0262931
	New Mexico	10	2.80073	0.0911324	<0.0001*	0.081956	0.0735361	0.297424	0.990551	0.00944891
	New Mexico Territory	7	1.37749	0.330609	0.00876848	-0.134526	0.0714096	0.118289	0.731663	0.268337
	New York	23	1.8798	0.0740981	<0.0001*	1.62624	0.192575	<0.0001*	0.966897	0.0331032
	North Carolina	23	2.83073	0.0857987	<0.0001*	-1.40854	0.108534	<0.0001*	0.980172	0.0198284
	North Dakota	13	0.911093	0.856564	0.310275	0.355126	0.420737	0.416616	0.0108293	0.989171
	Ohio	21	2.64263	0.0902074	<0.0001*	-0.758856	0.147536	0.0001*	0.9772	0.0227998
	Oklahoma	11	5.11883	0.643543	<0.0001*	-3.36892	0.792031	0.00213137	0.861627	0.138373
	Oregon	16	2.41557	0.112149	<0.0001*	0.450505	0.125062	0.00288556	0.968614	0.0313856
	Pennsylvania	23	2.19166	0.0716999	<0.0001*	0.770764	0.135857	<0.0001*	0.976972	0.0230282
	Rhode Island	23	2.08211	0.0757115	<0.0001*	-0.646854	0.162748	0.0007*	0.971696	0.0283038
	South Carolina	23	2.70832	0.136554	<0.0001*	-1.43905	0.167187	<0.0001*	0.946906	0.0530939
	South Dakota	13	3.24505	0.843475	0.00271241	-0.622495	0.526128	0.261686	0.534906	0.465094
	Tennessee	22	2.99487	0.126866	<0.0001*	-1.31641	0.158807	<0.0001*	0.963622	0.0363779
	Texas	17	2.84372	0.0815442	<0.0001*	-0.342069	0.0835045	0.000953162	0.987004	0.012996
	Utah	12	2.09982	0.0476458	<0.0001*	0.783721	0.0514523	<0.0001*	0.994366	0.00563436
	Utah Territory	5	2.56267	0.394713	0.00741885	0.376537	0.0962283	0.029664	0.911411	0.0885889
	Vermont	23	2.8217	0.367877	<0.0001*	-1.57435	0.415765	0.00108084	0.724423	0.275577
	Virginia	23	2.23528	0.151706	<0.0001*	0.169132	0.310704	0.591933	0.907602	0.0923978
	Washington	13	2.3137	0.0537846	<0.0001*	-0.0151372	0.0652923	0.82092	0.993554	0.0064463
	West Virginia	15	1.73132	0.0740423	<0.0001*	0.513294	0.107513	0.0004*	0.974989	0.0250107
	Wisconsin	17	2.921	0.140775	<0.0001*	-0.43984	0.208164	0.0517769	0.964089	0.0359114
	Wyoming	13	2.24248	0.10123	<0.0001*	-0.0509603	0.0280616	0.0966939	0.976083	0.0239174
