# Supplementary material for: Analyzing and interpreting spatial and temporal variability of the United States county population distributions using Taylor's law
Source: PLoS One. 2019 Dec 11;14(12):e0226096. doi: 10.1371/journal.pone.0226096 (PMC6905577; doi:10.1371/journal.pone.0226096)
Supplement: S4 Table — (XLSX) [file pone.0226096.s056.xlsx]

## Sheet: Sheet1
Table S4. Ordinary least-squares (ols) quadratic regression statistics of spatial quadratic Taylor's law, using count and density separately. Notations are defined in the caption of Tables S1 and S2.
measure	state	N	quadratic model (OLS)
			quadratic coefficient			slope			intercept			regression	adj.R2	1-adj.R2
			est	std err	p	est	std err	p	est	std err	p	p
count	Alabama	20	1.57626	0.393507	0.0009159	-10.5637	3.42489	0.00672549	24.4768	7.42256	0.00425188	<0.0001*	0.970332	0.0296679
	Alaska	6	0.60597	2.39082	0.816292	-2.88423	19.9811	0.894377	10.4429	41.6804	0.818344	0.00333573	0.962791	0.0372085
	Alaska Territory	7	-16.5132	31.7109	0.630044	143.454	275.264	0.629783	-303.794	596.659	0.637443	0.875981	-0.403908	1.40391
	Arizona	10	-0.610672	0.0938485	0.0003*	8.67841	0.9386	<0.0001*	-17.5835	2.33196	0.0001*	<0.0001*	0.99878	0.00121953
	Arizona Territory	5	0.386595	0.906405	0.711255	-1.29556	6.86386	0.867706	6.59252	12.9497	0.661299	0.0496772	0.900646	0.0993544
	Arkansas	18	1.86616	0.477318	0.00139344	-12.2086	3.85297	0.00635953	26.2974	7.72369	0.00391927	<0.0001*	0.952446	0.047554
	California	17	-0.290779	0.0786361	0.0023878	5.05406	0.756783	<0.0001*	-7.15838	1.79068	0.00132233	<0.0001*	0.993393	0.00660725
	Colorado	14	-0.974214	0.313295	0.00993298	10.5921	2.73105	0.0025705	-18.1739	5.92388	0.0106999	<0.0001*	0.972323	0.0276768
	Connecticut	23	-1.15138	0.0750234	<0.0001*	14.4736	0.759689	<0.0001*	-33.9176	1.91164	<0.0001*	<0.0001*	0.998677	0.00132269
	Delaware	23	-3.19966	0.367805	<0.0001*	34.6804	3.58153	<0.0001*	-83.5823	8.67667	<0.0001*	<0.0001*	0.978153	0.0218469
	Florida	17	-0.173939	0.130464	0.203745	3.99325	1.17433	0.00430912	-5.17086	2.60019	0.0666519	<0.0001*	0.987236	0.0127645
	Georgia	23	-0.449444	0.62986	0.483743	7.25497	5.35203	0.190352	-14.0449	11.3237	0.229214	<0.0001*	0.947024	0.0529759
	Hawaii	6	-0.935048	1.63053	0.606498	11.4737	17.1622	0.55163	-23.6531	45.1444	0.636562	0.00631476	0.94306	0.0569403
	Hawaii Territory	6	1.62119	1.01047	0.206968	-13.2585	9.62682	0.262207	35.619	22.8727	0.217278	0.00257351	0.968701	0.0312991
	Idaho	13	0.733044	0.834577	0.40037	-2.7795	6.90092	0.695591	7.18529	14.2388	0.624754	<0.0001*	0.93718	0.0628203
	Illinois	20	0.390616	0.246128	0.130928	-0.211366	2.13153	0.92217	2.68282	4.54749	0.562981	<0.0001*	0.978799	0.0212008
	Indiana	20	1.54674	0.392794	0.00106106	-10.2206	3.36231	0.00739966	23.6206	7.15305	0.00421036	<0.0001*	0.961891	0.0381089
	Iowa	17	3.96834	1.01463	0.00156711	-30.0682	8.28177	0.0027275	64.255	16.8099	0.00186625	<0.0001*	0.866436	0.133564
	Kansas	15	5.96724	0.766057	<0.0001*	-45.4079	6.30247	<0.0001*	93.9067	12.9414	<0.0001*	<0.0001*	0.973551	0.0264487
	Kentucky	22	0.812224	0.535521	0.145805	-3.08064	4.46964	0.499006	7.1037	9.30143	0.454413	<0.0001*	0.980414	0.0195859
	Louisiana	20	-0.74808	0.145492	0.0001*	8.57218	1.26981	<0.0001*	-13.9678	2.75748	0.0001*	<0.0001*	0.991503	0.00849701
	Maine	20	-3.28521	1.81279	0.0876497	34.8982	17.1549	0.0578285	-82.4653	40.5646	0.0579799	<0.0001*	0.95515	0.0448498
	Maryland	23	-3.22791	0.20318	<0.0001*	33.6005	1.94912	<0.0001*	-76.6067	4.6503	<0.0001*	<0.0001*	0.988765	0.0112353
	Massachusetts	23	-0.742703	0.535853	0.181001	9.70867	5.5242	0.0941339	-19.9835	14.1703	0.173831	<0.0001*	0.915385	0.0846146
	Michigan	18	-0.293739	0.396122	0.46982	5.50399	3.58594	0.145634	-9.29078	8.06143	0.267153	<0.0001*	0.962319	0.0376805
	Minnesota	16	0.511177	0.185544	0.01638	-1.65224	1.54378	0.303972	6.6808	3.18635	0.0561482	<0.0001*	0.987727	0.0122731
	Mississippi	20	2.76898	0.655908	0.0006*	-20.4183	5.40925	0.00151162	44.7545	11.1076	0.000870413	<0.0001*	0.924064	0.075936
	Missouri	19	-1.1308	0.377825	0.00860567	12.5373	3.17818	0.0011591	-23.7135	6.64519	0.00256417	<0.0001*	0.979455	0.0205451
	Montana	13	-1.89787	5.11578	0.718388	19.3468	41.7848	0.653269	-39.0094	85.2891	0.657175	<0.0001*	0.833406	0.166594
	Nebraska	15	3.61329	0.454555	<0.0001*	-24.9078	3.47687	<0.0001*	50.0001	6.60165	<0.0001*	<0.0001*	0.975774	0.0242261
	Nevada	15	-0.318896	0.13686	0.0380637	5.42345	1.17239	0.0006*	-8.26311	2.46448	0.00574942	<0.0001*	0.993347	0.00665333
	New Hampshire	23	-2.75637	1.18256	0.030339	29.5589	11.3244	0.0167533	-68.9838	27.0611	0.0191101	<0.0001*	0.9214	0.0786003
	New Jersey	23	-1.53955	0.114203	<0.0001*	17.543	1.12121	<0.0001*	-39.1503	2.72504	<0.0001*	<0.0001*	0.994666	0.00533408
	New Mexico	10	-3.01639	0.471354	0.0004*	30.4136	4.18544	0.0002*	-66.376	9.26884	0.0002*	<0.0001*	0.994754	0.00524571
	New Mexico Territory	7	1.74017	16.3927	0.92057	-12.2642	130.288	0.929532	28.5303	258.815	0.917533	0.567798	-0.130286	1.13029
	New York	23	-1.43846	0.207335	<0.0001*	16.9023	2.04613	<0.0001*	-37.9538	5.01731	<0.0001*	<0.0001*	0.988354	0.0116458
	North Carolina	23	0.477741	0.144863	0.00359378	-1.10533	1.27585	0.396571	4.03544	2.79478	0.164244	<0.0001*	0.996317	0.00368299
	North Dakota	13	5.00316	5.89792	0.416119	-36.5672	45.0948	0.436299	74.0772	85.8418	0.408384	0.0918138	0.255675	0.744325
	Ohio	21	0.0962545	0.223924	0.672405	2.00104	2.03919	0.339454	-1.91798	4.61487	0.68261	<0.0001*	0.98283	0.0171697
	Oklahoma	11	-13.2069	6.26706	0.0681537	125.004	56.6951	0.0585503	-285.703	128.18	0.0563919	0.0001*	0.871492	0.128508
	Oregon	16	-0.767301	0.190233	0.00141978	9.03345	1.63049	0.0001*	-15.6211	3.46056	0.0006*	<0.0001*	0.981844	0.018156
	Pennsylvania	23	-1.38805	0.299409	0.0002*	15.8649	2.86822	<0.0001*	-34.0852	6.83168	0.0001*	<0.0001*	0.982951	0.0170495
	Rhode Island	23	-1.53375	0.0972783	<0.0001*	17.0336	0.923514	<0.0001*	-36.5313	2.17547	<0.0001*	<0.0001*	0.997385	0.00261535
	South Carolina	23	2.73987	0.58432	0.0001*	-22.5217	5.30991	0.0004*	54.3914	12.0364	0.0002*	<0.0001*	0.919914	0.080086
	South Dakota	13	14.9167	3.22129	0.000935214	-111.552	24.8063	0.00114855	215.617	47.6915	0.00110652	<0.0001*	0.855032	0.144968
	Tennessee	22	-0.173147	0.338629	0.615019	4.99426	2.92717	0.104269	-9.64347	6.30367	0.142541	<0.0001*	0.983452	0.0165485
	Texas	17	0.126944	0.169482	0.46625	1.99166	1.4421	0.188901	-1.82834	3.04233	0.557466	<0.0001*	0.99051	0.00949035
	Utah	12	-0.964913	0.0468154	<0.0001*	10.9976	0.421838	<0.0001*	-20.2116	0.946756	<0.0001*	<0.0001*	0.999699	0.000300848
	Utah Territory	5	1.47236	1.01676	0.284576	-8.42881	7.24702	0.364805	18.5204	12.8518	0.286274	0.0160574	0.967885	0.0321148
	Vermont	23	1.97623	1.01658	0.0661004	-14.2531	8.92798	0.126069	32.6783	19.5935	0.110936	<0.0001*	0.915585	0.0844147
	Virginia	23	-1.77004	1.09067	0.12027	18.9377	9.48146	0.0595751	-39.9578	20.549	0.0660335	<0.0001*	0.906962	0.0930382
	Washington	13	-0.416137	0.0699041	0.0001*	6.16337	0.650146	<0.0001*	-9.78475	1.50463	0.0001*	<0.0001*	0.998445	0.00155455
	West Virginia	15	3.14729	0.539982	0.0001*	-23.9672	4.6183	0.0002*	53.0574	9.85021	0.0002*	<0.0001*	0.988727	0.0112727
	Wisconsin	17	-0.783846	0.513333	0.14904	9.99863	4.60152	0.0474468	-19.7721	10.2832	0.0750927	<0.0001*	0.968634	0.0313655
	Wyoming	13	1.08381	0.918673	0.265401	-6.45201	7.4781	0.40847	16.2177	15.1914	0.310814	<0.0001*	0.927461	0.0725387
density	Alabama	20	2.19608	0.333973	<0.0001*	-1.81572	0.674076	0.0153777	1.07582	0.317295	0.0034778	<0.0001*	0.968406	0.0315943
	Alaska	6	1.5117	1.22612	0.305412	1.25746	0.63152	0.140524	1.14473	0.0593707	0.0003*	0.00154164	0.977758	0.0222419
	Alaska Territory	7	0.923275	3.20797	0.78779	5.11294	8.11393	0.562805	2.07612	4.94176	0.695985	0.0394686	0.702	0.298
	Arizona	10	-0.869031	0.0782998	<0.0001*	3.99139	0.116543	<0.0001*	-0.562071	0.0350395	<0.0001*	<0.0001*	0.99941	0.000589766
	Arizona Territory	5	0.291765	0.000826358	<0.0001*	2.38417	0.00122644	<0.0001*	-0.272334	0.000358024	<0.0001*	<0.0001*	1	1.26696e-07
	Arkansas	18	1.71	0.360295	0.0003*	0.322088	0.494296	0.524511	-0.454468	0.156308	0.0108285	<0.0001*	0.957907	0.0420932
	California	17	-0.532554	0.042124	<0.0001*	3.50032	0.108842	<0.0001*	0.618595	0.0772585	<0.0001*	<0.0001*	0.995768	0.00423233
	Colorado	14	-1.52218	0.523434	0.0142383	5.87178	1.04613	0.0002*	-0.773572	0.362841	0.0563847	<0.0001*	0.983436	0.0165639
	Connecticut	23	-2.10113	0.0547004	<0.0001*	10.9775	0.202914	<0.0001*	-9.72253	0.180238	<0.0001*	<0.0001*	0.999471	0.000528614
	Delaware	23	-1.29355	0.119729	<0.0001*	7.17398	0.411589	<0.0001*	-5.17357	0.338536	<0.0001*	<0.0001*	0.995454	0.00454564
	Florida	17	-0.00413624	0.132489	0.975535	2.35249	0.307127	<0.0001*	-0.124249	0.146185	0.409658	<0.0001*	0.985118	0.0148825
	Georgia	23	0.348735	0.279076	0.22587	2.06722	0.65302	0.00486279	-0.44568	0.358538	0.228226	<0.0001*	0.96286	0.0371404
	Hawaii	6	0.248801	2.18565	0.91656	0.889828	8.76593	0.92555	1.65968	8.76997	0.86198	0.00597187	0.94514	0.05486
	Hawaii Territory	6	1.64688	0.5372	0.054748	-2.36981	1.5691	0.228127	2.79873	1.11734	0.0873359	0.0005*	0.988856	0.0111436
	Idaho	13	0.787946	0.131823	0.0001*	1.69516	0.14118	<0.0001*	0.0586643	0.041555	0.188382	<0.0001*	0.994219	0.00578053
	Illinois	20	0.784533	0.249886	0.0059754	1.47825	0.525313	0.0119473	-0.355098	0.245308	0.165931	<0.0001*	0.969174	0.0308259
	Indiana	20	1.57861	0.375678	0.0006*	-1.14029	0.959929	0.25121	1.11757	0.5815	0.0715463	<0.0001*	0.961761	0.0382391
	Iowa	17	4.5352	1.21441	0.00222048	-6.1085	2.23301	0.0160952	3.06258	0.944881	0.005915	<0.0001*	0.817857	0.182143
	Kansas	15	-0.036787	0.829334	0.965349	3.59556	1.60043	0.0442658	-0.857898	0.751273	0.275759	<0.0001*	0.968734	0.0312663
	Kentucky	22	1.75141	0.332969	<0.0001*	-1.21504	0.793504	0.142192	1.32002	0.453685	0.00898813	<0.0001*	0.981399	0.0186006
	Louisiana	20	-1.40751	0.144983	<0.0001*	5.58456	0.360284	<0.0001*	-1.14365	0.212285	<0.0001*	<0.0001*	0.989072	0.0109279
	Maine	20	0.974816	0.468901	0.0530766	0.021221	1.16526	0.985682	0.811602	0.716673	0.273163	<0.0001*	0.974568	0.0254322
	Maryland	23	-1.58809	0.376886	0.0004*	8.84411	1.46774	<0.0001*	-6.16936	1.36137	0.0002*	<0.0001*	0.961432	0.038568
	Massachusetts	23	-0.917786	0.116442	<0.0001*	6.07788	0.490342	<0.0001*	-3.57616	0.492157	<0.0001*	<0.0001*	0.989412	0.0105877
	Michigan	18	-0.367987	0.399597	0.371679	3.8021	1.04383	0.00240683	-1.13481	0.633497	0.0934333	<0.0001*	0.960441	0.0395592
	Minnesota	16	-0.20674	0.219169	0.362735	2.99546	0.467249	<0.0001*	0.0773047	0.232786	0.745118	<0.0001*	0.982041	0.0179594
	Mississippi	20	3.32767	0.701656	0.0002*	-4.18353	1.29077	0.00480303	2.14556	0.544083	0.00104813	<0.0001*	0.883702	0.116298
	Missouri	19	0.118109	0.32066	0.717454	2.89151	0.725121	0.00105925	-0.262689	0.335928	0.445645	<0.0001*	0.981726	0.0182742
	Montana	13	-4.21979	2.33032	0.100268	3.78009	1.21744	0.011156	0.441597	0.156366	0.0180325	0.0008*	0.708637	0.291363
	Nebraska	15	2.14797	0.456399	0.0005*	-0.188909	0.694526	0.790247	0.925885	0.24944	0.00297069	<0.0001*	0.973636	0.0263645
	Nevada	15	-0.36834	0.0366502	<0.0001*	2.54999	0.0426398	<0.0001*	0.542388	0.00876506	<0.0001*	<0.0001*	0.999465	0.00053534
	New Hampshire	23	-0.0723987	0.259599	0.783195	2.84021	0.725654	0.000860161	-1.38951	0.494394	0.0108023	<0.0001*	0.983479	0.0165212
	New Jersey	23	-0.895805	0.0910062	<0.0001*	6.16062	0.370631	<0.0001*	-4.13629	0.338991	<0.0001*	<0.0001*	0.995276	0.00472365
	New Mexico	10	-1.06226	0.109571	<0.0001*	4.20295	0.146895	<0.0001*	-0.259209	0.0408262	0.0004*	<0.0001*	0.999251	0.000748526
	New Mexico Territory	7	3.80146	1.14585	0.029445	2.1058	0.290881	0.00193209	-0.226143	0.0496153	0.0103552	0.00355279	0.910592	0.0894079
	New York	23	-0.711248	0.123881	<0.0001*	5.29685	0.596988	<0.0001*	-2.27363	0.689995	0.00361649	<0.0001*	0.986875	0.0131254
	North Carolina	23	0.971126	0.176084	<0.0001*	0.44355	0.436369	0.321552	-0.0851072	0.249978	0.737061	<0.0001*	0.991741	0.00825907
	North Dakota	13	-8.44066	6.8008	0.242884	5.84732	4.06418	0.180777	0.0614505	0.474045	0.89943	0.29944	0.0571487	0.942851
	Ohio	21	0.368141	0.181718	0.0578601	1.61368	0.514737	0.00572389	-0.11906	0.344159	0.733394	<0.0001*	0.980402	0.0195979
	Oklahoma	11	-10.6805	3.86127	0.024445	31.2229	9.4499	0.0107935	-19.1781	5.74689	0.0102749	<0.0001*	0.92043	0.07957
	Oregon	16	-0.847109	0.0823864	<0.0001*	3.79625	0.139694	<0.0001*	0.128228	0.0531674	0.0313854	<0.0001*	0.996299	0.00370106
	Pennsylvania	23	-0.921709	0.172716	<0.0001*	5.38667	0.600559	<0.0001*	-1.8302	0.49552	0.00143887	<0.0001*	0.990025	0.00997534
	Rhode Island	23	-1.03236	0.134005	<0.0001*	6.3833	0.559671	<0.0001*	-4.96416	0.566624	<0.0001*	<0.0001*	0.992509	0.00749061
	South Carolina	23	1.50771	0.267477	<0.0001*	-0.742139	0.618282	0.244038	0.363482	0.337043	0.293671	<0.0001*	0.978464	0.0215357
	South Dakota	13	16.8388	5.02115	0.00732118	-14.1396	5.21933	0.0219682	3.55073	1.30072	0.0212001	0.0003*	0.759205	0.240795
	Tennessee	22	1.04016	0.306615	0.00305667	0.617503	0.708285	0.394185	-0.0795523	0.386606	0.839159	<0.0001*	0.976152	0.0238479
	Texas	17	0.321754	0.156453	0.0588661	2.30779	0.270888	<0.0001*	-0.18466	0.107685	0.108421	<0.0001*	0.989306	0.0106937
	Utah	12	-0.518053	0.0547169	<0.0001*	3.18204	0.115306	<0.0001*	0.273751	0.0562994	0.000892836	<0.0001*	0.999429	0.0005712
	Utah Territory	5	2.20545	3.07762	0.547997	1.86448	1.06546	0.222234	0.348596	0.112126	0.0897497	0.0528672	0.894266	0.105734
	Vermont	23	5.12203	0.928234	<0.0001*	-8.09661	1.99284	0.0006*	4.08935	1.06087	0.000987946	<0.0001*	0.885287	0.114713
	Virginia	23	-1.63551	0.296352	<0.0001*	8.28718	1.10096	<0.0001*	-4.72236	0.908715	<0.0001*	<0.0001*	0.961545	0.0384555
	Washington	13	-0.448617	0.0466228	<0.0001*	3.29448	0.103438	<0.0001*	-0.4855	0.0533538	<0.0001*	<0.0001*	0.999309	0.000691203
	West Virginia	15	0.881456	0.464066	0.0818065	-0.620161	1.23984	0.625986	2.04193	0.810749	0.0269801	<0.0001*	0.979168	0.0208319
	Wisconsin	17	-1.1964	0.432674	0.015187	6.15963	1.17709	0.0001*	-2.5199	0.771948	0.00564926	<0.0001*	0.975114	0.0248856
	Wyoming	13	0.570683	0.345797	0.129886	2.31124	0.102933	<0.0001*	-0.0985819	0.0389028	0.0296638	<0.0001*	0.979323	0.0206774
