# Supplementary material for: Analyzing and interpreting spatial and temporal variability of the United States county population distributions using Taylor's law
Source: PLoS One. 2019 Dec 11;14(12):e0226096. doi: 10.1371/journal.pone.0226096 (PMC6905577; doi:10.1371/journal.pone.0226096)
Supplement: S5 Table — (XLSX) [file pone.0226096.s057.xlsx]

## Sheet: Sheet1
Table S5. Ordinary least-squares (ols) linear regression statistics of temporal Taylor's law, using count and density separately. N is the number of mean-variance pairs (counties) within each state. Other notations are defined in the caption of Table S1.
measure	state	N	linear model (OLS)
			slope			intercept			adj.R2	1-adj.R2
			est	std err	p	est	std err	p
count	Alabama	68	3.02	0.169006	<0.0001*	-5.3275	0.754057	<0.0001*	0.826112	0.173888
	Alaska	30	2.58216	0.225027	<0.0001*	-3.92947	0.874185	0.0001*	0.818378	0.181622
	Alaska Territory	6	3.82261	2.32558	0.175578	-8.95022	9.9744	0.420275	0.253935	0.746065
	Arizona	15	2.61761	0.200897	<0.0001*	-3.42591	0.963548	0.00351902	0.923401	0.0765987
	Arizona Territory	13	2.05288	0.554347	0.00348191	-0.982956	2.16913	0.659244	0.514445	0.485555
	Arkansas	75	2.72463	0.118694	<0.0001*	-3.8366	0.504888	<0.0001*	0.876653	0.123347
	Arkansas Territory	7	2.08533	1.62021	0.254427	-2.20913	5.2095	0.689149	0.0986347	0.901365
	California	59	2.22807	0.0427094	<0.0001*	-1.21753	0.205496	<0.0001*	0.979126	0.0208744
	Colorado	63	2.30457	0.0848182	<0.0001*	-1.79856	0.344513	<0.0001*	0.922427	0.0775731
	Connecticut	8	2.28742	0.181668	<0.0001*	-1.70929	0.92871	0.115298	0.957457	0.0425433
	Dakota Territory	14	2.18318	0.224774	<0.0001*	-1.00562	0.733323	0.195374	0.877748	0.122252
	District Of Columbia	6	2.59714	0.288525	0.000843318	-4.00643	1.20067	0.0289213	0.941194	0.0588057
	Florida	68	2.1947	0.100013	<0.0001*	-1.108	0.462933	0.0195432	0.877635	0.122365
	Florida Territory	15	1.49198	0.690939	0.0500932	0.0515448	2.29958	0.982457	0.207373	0.792627
	Georgia	162	2.90257	0.109773	<0.0001*	-4.48859	0.4594	<0.0001*	0.812608	0.187392
	Hawaii	5	1.89851	0.101476	0.0003*	-0.467678	0.478508	0.400467	0.988669	0.0113306
	Hawaii Territory	5	2.54371	0.176552	0.0007*	-3.79517	0.792703	0.0173293	0.981005	0.0189949
	Idaho	44	2.50626	0.138984	<0.0001*	-2.94925	0.560053	<0.0001*	0.882891	0.117109
	Idaho Territory	9	2.12847	0.793587	0.031444	-1.56227	2.62	0.569756	0.436365	0.563635
	Illinois	102	2.56008	0.0616258	<0.0001*	-3.24531	0.2731	<0.0001*	0.944681	0.0553192
	Indiana	92	2.8545	0.0972073	<0.0001*	-4.504	0.428065	<0.0001*	0.904443	0.0955571
	Iowa	99	2.30058	0.114924	<0.0001*	-2.21084	0.489891	<0.0001*	0.803105	0.196895
	Kansas	106	2.06906	0.0727769	<0.0001*	-1.20202	0.294054	0.0001*	0.884903	0.115097
	Kentucky	120	2.9479	0.123703	<0.0001*	-4.83725	0.516586	<0.0001*	0.826504	0.173496
	Louisiana	65	2.75079	0.165131	<0.0001*	-3.97141	0.726113	<0.0001*	0.812039	0.187961
	Maine	16	3.19066	0.304136	<0.0001*	-6.66543	1.41477	0.0003*	0.87909	0.12091
	Maryland	24	2.85889	0.227849	<0.0001*	-4.44806	1.07182	0.0004*	0.87182	0.12818
	Massachusetts	22	2.23803	0.195307	<0.0001*	-1.90166	0.964797	0.0627157	0.861212	0.138788
	Michigan	86	2.26108	0.0547629	<0.0001*	-1.70463	0.241132	<0.0001*	0.952481	0.0475194
	Michigan Territory	7	3.04945	0.589056	0.0035346	-4.46637	1.89957	0.065458	0.811319	0.188681
	Minnesota	89	2.30754	0.113376	<0.0001*	-2.05782	0.481946	<0.0001*	0.824436	0.175564
	Mississippi	82	2.74662	0.224865	<0.0001*	-4.09247	0.96586	0.0001*	0.646588	0.353412
	Missouri	115	2.5207	0.0875729	<0.0001*	-2.98044	0.372428	<0.0001*	0.878919	0.121081
	Montana	57	2.00935	0.150671	<0.0001*	-1.18083	0.579429	0.0463795	0.759501	0.240499
	Montana Territory	10	3.57558	1.16995	0.0156732	-6.95218	3.92235	0.114258	0.480976	0.519024
	Nebraska	95	1.9452	0.0635325	<0.0001*	-0.689493	0.246153	0.00619586	0.908775	0.0912246
	Nevada	20	2.20747	0.142095	<0.0001*	-1.08942	0.549581	0.0629258	0.926738	0.0732622
	New Hampshire	10	2.7583	0.225047	<0.0001*	-4.15239	1.04926	0.00419193	0.943118	0.0568819
	New Jersey	21	2.03197	0.159304	<0.0001*	-0.311211	0.814928	0.706782	0.889927	0.110073
	New Mexico	33	2.46338	0.211287	<0.0001*	-2.94101	0.907415	0.00284365	0.808304	0.191696
	New Mexico Territory	20	2.45425	0.649389	0.00137324	-2.8282	2.55126	0.282217	0.411459	0.588541
	New York	62	2.58248	0.109748	<0.0001*	-3.64128	0.538494	<0.0001*	0.900605	0.0993954
	North Carolina	100	3.05353	0.0897857	<0.0001*	-5.16152	0.395121	<0.0001*	0.921092	0.0789083
	North Dakota	53	1.89018	0.161253	<0.0001*	-0.497657	0.632794	0.435247	0.723992	0.276008
	Ohio	88	2.74431	0.0872042	<0.0001*	-4.10519	0.404269	<0.0001*	0.919172	0.0808282
	Oklahoma	77	2.04066	0.149807	<0.0001*	-1.36364	0.652336	0.0399711	0.708317	0.291683
	Oklahoma Territory	8	3.9331	0.446386	0.0001*	-8.81376	1.81618	0.00284326	0.916301	0.0836989
	Oregon	36	2.63886	0.0931382	<0.0001*	-3.23457	0.404525	<0.0001*	0.958171	0.0418287
	Pennsylvania	67	2.58125	0.0968277	<0.0001*	-3.38348	0.462952	<0.0001*	0.914911	0.0850891
	Rhode Island	5	1.95379	0.175077	0.0015421	0.0177174	0.838839	0.984475	0.968636	0.0313636
	South Carolina	47	3.58582	0.234455	<0.0001*	-7.97142	1.0642	<0.0001*	0.835075	0.164925
	South Dakota	72	1.63372	0.128128	<0.0001*	0.338223	0.485384	0.488226	0.694728	0.305272
	Tennessee	96	2.99469	0.126344	<0.0001*	-5.06213	0.541074	<0.0001*	0.855143	0.144857
	Texas	257	2.30242	0.0395647	<0.0001*	-1.73736	0.163009	<0.0001*	0.9297	0.0703004
	Utah	29	2.52871	0.136273	<0.0001*	-2.89712	0.561341	<0.0001*	0.924596	0.0754045
	Utah Territory	23	2.47898	0.271052	<0.0001*	-2.33785	0.959034	0.0237567	0.789766	0.210234
	Vermont	14	2.28563	0.255466	<0.0001*	-2.31115	1.11068	0.059535	0.858768	0.141232
	Virginia	185	2.90628	0.124081	<0.0001*	-4.78385	0.514758	<0.0001*	0.748502	0.251498
	Washington	40	2.44193	0.12297	<0.0001*	-2.59166	0.55329	<0.0001*	0.909793	0.0902072
	Washington Territory	22	2.00119	0.250563	<0.0001*	-0.498689	0.775396	0.527439	0.749369	0.250631
	West Virginia	55	2.68448	0.16224	<0.0001*	-3.96039	0.702388	<0.0001*	0.834753	0.165247
	Wisconsin	73	2.60484	0.0972905	<0.0001*	-3.54024	0.430606	<0.0001*	0.908611	0.0913895
	Wyoming	24	2.36092	0.231558	<0.0001*	-2.34175	0.927409	0.019281	0.817394	0.182606
	Wyoming Territory	5	2.13045	1.61318	0.278327	-1.37412	5.55212	0.820497	0.156851	0.843149
density	Alabama	68	2.83538	0.178497	<0.0001*	-1.71029	0.211755	<0.0001*	0.789524	0.210476
	Alaska	30	2.30633	0.158778	<0.0001*	-1.40709	0.149694	<0.0001*	0.878656	0.121344
	Alaska Territory	6	1.76531	0.871646	0.11282	-1.42984	1.19651	0.298092	0.382844	0.617156
	Arizona	15	2.47288	0.286976	<0.0001*	-0.728363	0.203193	0.00332857	0.839547	0.160453
	Arizona Territory	13	1.92917	0.394143	0.0005*	-0.693957	0.223615	0.0100438	0.656723	0.343277
	Arkansas	75	2.61853	0.135211	<0.0001*	-1.31948	0.136792	<0.0001*	0.83484	0.16516
	Arkansas Territory	7	3.31575	0.584586	0.00237074	0.237956	0.465714	0.63114	0.838585	0.161415
	California	59	2.26324	0.0645787	<0.0001*	-0.456489	0.0887738	<0.0001*	0.954872	0.0451278
	Colorado	63	2.21808	0.0780354	<0.0001*	-0.666748	0.0642877	<0.0001*	0.928647	0.0713525
	Connecticut	8	2.38813	0.15433	<0.0001*	-0.980052	0.298642	0.016787	0.971481	0.0285193
	Dakota Territory	14	1.96568	0.144856	<0.0001*	-0.395487	0.134977	0.0126032	0.933722	0.0662784
	District Of Columbia	6	2.45655	0.378823	0.00291537	-2.70829	0.988402	0.0519017	0.891426	0.108574
	Florida	68	2.15315	0.109247	<0.0001*	-0.384286	0.151715	0.0136958	0.852569	0.147431
	Florida Territory	15	1.38331	0.39408	0.003838	-1.55665	0.274269	0.0001*	0.447115	0.552885
	Georgia	162	2.62228	0.112256	<0.0001*	-1.4426	0.142457	<0.0001*	0.771851	0.228149
	Hawaii	5	1.69588	0.118145	0.0007*	-0.490909	0.190594	0.0820869	0.980865	0.0191349
	Hawaii Territory	5	2.7383	0.51227	0.012804	-2.42981	0.716587	0.0427492	0.873312	0.126688
	Idaho	44	2.312	0.112914	<0.0001*	-1.05036	0.0801458	<0.0001*	0.906777	0.0932228
	Idaho Territory	9	2.25884	0.401806	0.000797652	-0.72231	0.413402	0.124092	0.792765	0.207235
	Illinois	102	2.69795	0.0730587	<0.0001*	-1.66006	0.0975434	<0.0001*	0.930998	0.0690025
	Indiana	92	2.85659	0.112275	<0.0001*	-1.94627	0.160597	<0.0001*	0.876583	0.123417
	Iowa	99	2.26866	0.128626	<0.0001*	-1.226	0.144025	<0.0001*	0.759853	0.240147
	Kansas	106	2.02925	0.0647914	<0.0001*	-0.9453	0.0563894	<0.0001*	0.903219	0.096781
	Kentucky	120	2.71445	0.140712	<0.0001*	-1.71178	0.179345	<0.0001*	0.757209	0.242791
	Louisiana	65	2.50226	0.14408	<0.0001*	-1.22516	0.17513	<0.0001*	0.824473	0.175527
	Maine	16	2.27199	0.187553	<0.0001*	-1.40359	0.222172	<0.0001*	0.906684	0.0933156
	Maryland	24	2.47922	0.19148	<0.0001*	-1.19211	0.338078	0.00190107	0.878719	0.121281
	Massachusetts	20	2.09368	0.0628819	<0.0001*	-0.557759	0.113767	0.0001*	0.983135	0.0168652
	Michigan	86	2.2186	0.0586234	<0.0001*	-0.799258	0.0744422	<0.0001*	0.94394	0.05606
	Michigan Territory	7	2.44516	0.144689	<0.0001*	-0.277638	0.194504	0.212815	0.979352	0.0206476
	Minnesota	89	2.17275	0.0900089	<0.0001*	-0.914551	0.0946119	<0.0001*	0.868599	0.131401
	Mississippi	82	2.29268	0.256576	<0.0001*	-1.16948	0.290844	0.0001*	0.493263	0.506737
	Missouri	115	2.35722	0.0795895	<0.0001*	-1.12994	0.0896549	<0.0001*	0.884869	0.115131
	Montana	57	2.15092	0.172056	<0.0001*	-1.11906	0.0738513	<0.0001*	0.734952	0.265048
	Montana Territory	10	3.12766	0.679493	0.00174874	-0.538442	0.81405	0.52692	0.691643	0.308357
	Nebraska	95	1.96636	0.0527912	<0.0001*	-0.876104	0.0426279	<0.0001*	0.936504	0.0634961
	Nevada	19	2.12788	0.10934	<0.0001*	-0.298376	0.100748	0.00874083	0.954515	0.0454849
	New Hampshire	10	2.55627	0.207844	<0.0001*	-1.28798	0.281534	0.00181419	0.943491	0.0565094
	New Jersey	21	1.90654	0.0981589	<0.0001*	0.0700242	0.22334	0.757293	0.949527	0.0504729
	New Mexico	33	2.33364	0.180176	<0.0001*	-1.07031	0.120503	<0.0001*	0.838997	0.161003
	New Mexico Territory	20	2.09416	0.504537	0.0006*	-0.532555	0.178885	0.00807798	0.460655	0.539345
	New York	62	2.30163	0.0730417	<0.0001*	-1.2704	0.135571	<0.0001*	0.942068	0.0579325
	North Carolina	100	2.78228	0.120825	<0.0001*	-1.50999	0.16199	<0.0001*	0.842421	0.157579
	North Dakota	53	1.89552	0.180224	<0.0001*	-0.889622	0.0864365	<0.0001*	0.678257	0.321743
	Ohio	88	2.72988	0.0872833	<0.0001*	-1.77827	0.138196	<0.0001*	0.918248	0.0817522
	Oklahoma	77	2.10939	0.132533	<0.0001*	-1.29611	0.142232	<0.0001*	0.768515	0.231485
	Oklahoma Territory	8	2.44603	0.293094	0.0002*	-1.63626	0.251409	0.0006*	0.907466	0.0925342
	Oregon	36	2.41372	0.0756699	<0.0001*	-0.703661	0.0688195	<0.0001*	0.966714	0.0332864
	Pennsylvania	67	2.37945	0.0953825	<0.0001*	-1.17715	0.155453	<0.0001*	0.903975	0.0960252
	Rhode Island	5	1.85374	0.176362	0.00183893	0.127887	0.388706	0.76378	0.964752	0.0352482
	South Carolina	47	3.06105	0.335083	<0.0001*	-2.07381	0.435061	<0.0001*	0.641889	0.358111
	South Dakota	72	1.70006	0.109165	<0.0001*	-0.961077	0.067032	<0.0001*	0.772819	0.227181
	Tennessee	96	2.89017	0.172509	<0.0001*	-1.86802	0.218442	<0.0001*	0.746456	0.253544
	Texas	256	2.2655	0.0369774	<0.0001*	-0.684158	0.0341076	<0.0001*	0.936372	0.0636279
	Utah	29	2.38908	0.121099	<0.0001*	-0.860869	0.0971018	<0.0001*	0.932726	0.067274
	Utah Territory	23	2.04293	0.186051	<0.0001*	-0.619649	0.135268	0.0002*	0.844601	0.155399
	Vermont	14	2.52986	0.327751	<0.0001*	-1.61859	0.369857	0.000902203	0.818386	0.181614
	Virginia	185	2.02721	0.0557106	<0.0001*	-0.954058	0.0979783	<0.0001*	0.877912	0.122088
	Washington	40	2.46793	0.118502	<0.0001*	-1.03438	0.125753	<0.0001*	0.917325	0.0826752
	Washington Territory	22	2.01773	0.172503	<0.0001*	-0.418772	0.125676	0.00332178	0.866084	0.133916
	West Virginia	55	2.49063	0.14332	<0.0001*	-1.64729	0.1951	<0.0001*	0.847886	0.152114
	Wisconsin	73	2.30338	0.0934501	<0.0001*	-1.18783	0.115838	<0.0001*	0.893889	0.106111
	Wyoming	24	2.10134	0.249205	<0.0001*	-0.829573	0.0982432	<0.0001*	0.752957	0.247043
	Wyoming Territory	5	2.95718	0.472952	0.00825424	0.39835	0.556468	0.52577	0.904977	0.0950233
