# Supplementary material for: Analyzing and interpreting spatial and temporal variability of the United States county population distributions using Taylor's law
Source: PLoS One. 2019 Dec 11;14(12):e0226096. doi: 10.1371/journal.pone.0226096 (PMC6905577; doi:10.1371/journal.pone.0226096)
Supplement: S6 Table — (XLSX) [file pone.0226096.s058.xlsx]

## Sheet: Sheet1
Table S6. Ordinary least-squares (ols) quadratic regression statistics of temporal quadratic Taylor's law, using count and density separately. N is the number of mean-variance pairs (counties) within each state. Other notations are defined in the caption of Tables S1 and S2.
measure	state	N	quadratic model (OLS)
			quadratic coefficient			slope			intercept			regression	adj.R2	1-adj.R2
			est	std err	p	est	std err	p	est	std err	p	p
count	Alabama	68	-0.608032	0.376725	0.111373	8.67202	3.50587	0.0159988	-18.3975	8.13212	0.027027	<0.0001*	0.83024	0.16976
	Alaska	30	0.0727073	0.289921	0.803881	1.99561	2.35004	0.403247	-2.76906	4.71182	0.561629	<0.0001*	0.812089	0.187911
	Alaska Territory	6	-22.2865	18.7903	0.320976	193.704	160.109	0.312983	-412.952	340.757	0.312306	0.259004	0.322796	0.677204
	Arizona	15	-0.587089	0.24583	0.0342478	8.55007	2.49003	0.00495156	-18.2122	6.24623	0.012943	<0.0001*	0.943752	0.0562479
	Arizona Territory	13	2.89853	1.53361	0.0880601	-20.1112	11.7376	0.117412	41.1706	22.3887	0.09577	0.00379321	0.606466	0.393534
	Arkansas	75	0.303973	0.296437	0.308596	0.0697542	2.59177	0.978603	1.93629	5.65234	0.732925	<0.0001*	0.87674	0.12326
	Arkansas Territory	7	11.0689	4.0832	0.0534903	-69.4985	26.4283	0.0582046	112.884	42.5969	0.0569793	0.0700917	0.602877	0.397123
	California	59	-0.0334891	0.0414772	0.422848	2.54287	0.392232	<0.0001*	-1.93926	0.917343	0.0389821	<0.0001*	0.978997	0.0210027
	Colorado	63	0.0270441	0.108717	0.804398	2.07633	0.921474	0.0279096	-1.32752	1.92512	0.493117	<0.0001*	0.921215	0.0787847
	Connecticut	8	1.21774	0.960818	0.260833	-10.2411	9.88677	0.347753	30.3593	25.3183	0.284208	0.0001*	0.961361	0.038639
	Dakota Territory	14	-1.07038	0.571805	0.0880259	8.57066	3.41835	0.0291284	-10.2087	4.96136	0.0641265	<0.0001*	0.898855	0.101145
	District Of Columbia	6	-0.355648	0.370335	0.407728	5.80076	3.34861	0.181647	-10.9119	7.29217	0.231452	0.00682562	0.940029	0.0599713
	Florida	68	-0.711018	0.102913	<0.0001*	8.9626	0.982575	<0.0001*	-16.9469	2.31973	<0.0001*	<0.0001*	0.928361	0.071639
	Florida Territory	15	2.44137	1.67227	0.169992	-14.4609	10.9473	0.211153	25.7948	17.7708	0.17227	0.0596056	0.270831	0.729169
	Georgia	162	0.00354063	0.188407	0.98503	2.87179	1.64161	0.0821555	-4.42218	3.56329	0.216419	<0.0001*	0.81143	0.18857
	Hawaii	5	-0.131179	0.0825121	0.252836	2.91492	0.644643	0.04559	-2.17418	1.14189	0.197215	0.00375394	0.992492	0.00750787
	Hawaii Territory	5	0.181688	0.28903	0.593822	1.09712	2.3097	0.681601	-1.07376	4.4192	0.830672	0.0118959	0.976208	0.0237917
	Idaho	44	0.396522	0.213165	0.0700456	-0.691414	1.72432	0.690519	3.4239	3.46909	0.329444	<0.0001*	0.889371	0.110629
	Idaho Territory	9	0.00347338	3.11071	0.999145	2.10596	20.1779	0.920277	-1.52606	32.5572	0.964136	0.119955	0.342426	0.657574
	Illinois	102	-0.0992756	0.0720437	0.171312	3.49986	0.684747	<0.0001*	-5.44178	1.61698	0.00108888	<0.0001*	0.945174	0.0548264
	Indiana	92	-0.313724	0.1755	0.077245	5.71566	1.60344	0.0006*	-10.9873	3.65142	0.00340814	<0.0001*	0.906718	0.0932815
	Iowa	99	1.19969	0.279617	<0.0001*	-8.35393	2.48555	0.00111588	21.326	5.50436	0.0002*	<0.0001*	0.833064	0.166936
	Kansas	106	0.502521	0.105986	<0.0001*	-2.07255	0.876009	0.0198572	7.23962	1.80043	0.0001*	<0.0001*	0.904606	0.0953937
	Kentucky	120	-0.170638	0.215006	0.429008	4.43279	1.87507	0.0197231	-8.04988	4.08087	0.0509011	<0.0001*	0.825958	0.174042
	Louisiana	65	-0.0974264	0.3291	0.76819	3.63689	2.99781	0.229662	-5.97332	6.80177	0.383225	<0.0001*	0.809277	0.190723
	Maine	16	-0.143828	1.27136	0.911657	4.53773	11.9115	0.709392	-9.81026	27.8373	0.730176	<0.0001*	0.869917	0.130083
	Maryland	24	-1.30436	0.464754	0.010573	15.545	4.52455	0.00248094	-35.031	10.9371	0.004274	<0.0001*	0.902345	0.097655
	Massachusetts	22	0.367516	0.314141	0.256504	-1.25724	2.9939	0.679244	6.25219	7.03491	0.385257	<0.0001*	0.863724	0.136276
	Michigan	86	0.0832858	0.0425484	0.053657	1.5556	0.364415	0.0001*	-0.239016	0.785406	0.761645	<0.0001*	0.95403	0.0459698
	Michigan Territory	7	-2.16066	2.00628	0.342121	16.9969	12.9638	0.260023	-26.7728	20.7968	0.26741	0.0148574	0.817164	0.182836
	Minnesota	89	0.320889	0.122458	0.0103825	-0.484494	1.07114	0.652179	3.96038	2.34357	0.0946713	<0.0001*	0.835527	0.164473
	Mississippi	82	1.74125	0.612366	0.00567826	-12.3966	5.32997	0.022593	28.737	11.5826	0.0152235	<0.0001*	0.675342	0.324658
	Missouri	115	-0.302137	0.131354	0.0232911	5.29618	1.2097	<0.0001*	-9.2835	2.76454	0.00107316	<0.0001*	0.883348	0.116652
	Montana	57	0.558089	0.135464	0.0001*	-2.06558	0.997957	0.0432677	6.10799	1.84127	0.00163094	<0.0001*	0.813627	0.186373
	Montana Territory	10	-1.95703	2.12165	0.387003	15.3741	12.8453	0.270318	-24.2185	19.1329	0.246082	0.0446434	0.471115	0.528885
	Nebraska	95	0.203403	0.0574973	0.0006*	0.436956	0.430536	0.312809	2.05414	0.809571	0.0128536	<0.0001*	0.918826	0.0811741
	Nevada	20	0.0788931	0.11493	0.501689	1.59158	0.908741	0.097895	0.068147	1.7762	0.969842	<0.0001*	0.92452	0.0754796
	New Hampshire	10	1.34604	0.881912	0.170775	-9.95503	8.33224	0.271087	25.7757	19.6326	0.230617	<0.0001*	0.951224	0.0487758
	New Jersey	21	-0.84772	0.474697	0.0909877	10.6278	4.81576	0.0405485	-21.9977	12.1682	0.0873792	<0.0001*	0.901299	0.098701
	New Mexico	33	0.531774	0.306262	0.0927654	-2.09393	2.63264	0.432646	6.714	5.62966	0.242369	<0.0001*	0.820003	0.179997
	New Mexico Territory	20	-4.59461	2.68065	0.104703	38.1359	20.827	0.0846735	-71.9314	40.39	0.0928004	0.00179919	0.46866	0.53134
	New York	62	-0.206596	0.148297	0.16881	4.68055	1.50995	0.00296656	-8.91104	3.82025	0.0231011	<0.0001*	0.902139	0.097861
	North Carolina	100	-0.345876	0.19415	0.0779627	6.11395	1.72019	0.0006*	-11.8947	3.79971	0.00230658	<0.0001*	0.922804	0.0771961
	North Dakota	53	1.10759	0.329335	0.00148531	-7.03377	2.65755	0.0108398	17.3516	5.33862	0.00206612	<0.0001*	0.770408	0.229592
	Ohio	88	-0.642565	0.163902	0.0002*	9.00254	1.59836	<0.0001*	-19.2256	3.87494	<0.0001*	<0.0001*	0.930744	0.0692563
	Oklahoma	77	0.687304	0.226208	0.00328558	-4.15733	2.04486	0.0456328	12.5075	4.60711	0.00824741	<0.0001*	0.737165	0.262835
	Oklahoma Territory	8	-4.18806	0.727404	0.00221863	36.2152	5.60972	0.00132716	-70.5927	10.7542	0.00123042	<0.0001*	0.986836	0.0131639
	Oregon	36	-0.244502	0.139319	0.0885439	4.76815	1.21665	0.0004*	-7.8081	2.63545	0.00561924	<0.0001*	0.960583	0.0394174
	Pennsylvania	67	-0.193405	0.142388	0.179138	4.43996	1.37179	0.00191717	-7.81112	3.29199	0.0206711	<0.0001*	0.916003	0.0839971
	Rhode Island	5	-0.333267	0.577825	0.622367	5.26705	5.74804	0.456229	-8.15224	14.1972	0.623796	0.0201682	0.959664	0.0403364
	South Carolina	47	-0.721116	0.739539	0.334847	10.1979	6.78508	0.139985	-23.0773	15.5284	0.144373	<0.0001*	0.834895	0.165105
	South Dakota	72	0.3896	0.132727	0.00452235	-1.06942	0.928896	0.253593	4.91129	1.6247	0.00351238	<0.0001*	0.724683	0.275317
	Tennessee	96	-0.279471	0.204206	0.17443	5.46461	1.80911	0.00325729	-10.4818	3.99651	0.0101932	<0.0001*	0.856476	0.143524
	Texas	257	0.148193	0.0400406	0.0003*	1.07406	0.334132	0.001476	0.76229	0.693872	0.272982	<0.0001*	0.933034	0.0669658
	Utah	29	-0.0576484	0.161894	0.724648	3.01597	1.37537	0.0374625	-3.90395	2.88449	0.187569	<0.0001*	0.922075	0.0779246
	Utah Territory	23	-0.135743	0.379001	0.723977	3.43448	2.68212	0.215019	-3.99867	4.73943	0.408814	<0.0001*	0.780661	0.219339
	Vermont	14	1.21429	0.695522	0.108663	-7.84572	5.80784	0.203865	18.6774	12.0656	0.149897	<0.0001*	0.879358	0.120642
	Virginia	185	-0.179169	0.217396	0.410929	4.44186	1.86734	0.0184087	-8.04379	3.9889	0.0452129	<0.0001*	0.74806	0.25194
	Washington	40	-0.243714	0.167515	0.154134	4.67735	1.54127	0.00438837	-7.64067	3.51298	0.0360966	<0.0001*	0.912368	0.087632
	Washington Territory	22	-0.0502051	0.741855	0.946751	2.31319	4.61738	0.622144	-0.97874	7.13792	0.89238	<0.0001*	0.736242	0.263758
	West Virginia	55	0.130245	0.444753	0.770804	1.5414	3.90674	0.694789	-1.46452	8.55214	0.864695	<0.0001*	0.831852	0.168148
	Wisconsin	73	0.0857864	0.0972995	0.380971	1.868	0.841392	0.0296503	-1.97463	1.82735	0.283585	<0.0001*	0.908323	0.091677
	Wyoming	24	0.477793	0.277204	0.0994707	-1.16014	2.05485	0.578336	4.02114	3.79701	0.301617	<0.0001*	0.832408	0.167592
	Wyoming Territory	5	6.93787	16.9888	0.722567	-46.1001	118.117	0.733968	82.2997	204.996	0.726909	0.58369	-0.16738	1.16738
density	Alabama	68	-0.0800617	0.463055	0.863268	3.03978	1.19579	0.0134121	-1.83423	0.747903	0.0168804	<0.0001*	0.786384	0.213616
	Alaska	30	-0.0350318	0.151302	0.818644	2.28946	0.177207	<0.0001*	-1.38549	0.178591	<0.0001*	<0.0001*	0.874411	0.125589
	Alaska Territory	6	0.532045	2.92185	0.86712	3.00056	6.85708	0.691275	-0.803495	3.70402	0.842181	0.341245	0.186121	0.813879
	Arizona	15	-0.120687	0.570536	0.836022	2.67512	1.0015	0.0203685	-0.780313	0.323844	0.0329407	<0.0001*	0.826822	0.173178
	Arizona Territory	13	-0.34599	0.907885	0.711104	1.59476	0.968748	0.130744	-0.719542	0.24233	0.0140635	0.0028706	0.627801	0.372199
	Arkansas	75	0.388688	0.336545	0.251936	1.77052	0.746534	0.0203852	-0.883464	0.401437	0.0309611	<0.0001*	0.835592	0.164408
	Arkansas Territory	7	-0.56685	2.17656	0.807386	2.33331	3.82761	0.575056	-0.141714	1.54657	0.931397	0.0174954	0.801595	0.198405
	California	59	-0.233302	0.0421777	<0.0001*	2.84309	0.117192	<0.0001*	-0.650178	0.0800841	<0.0001*	<0.0001*	0.970296	0.0297042
	Colorado	63	-0.160361	0.0608864	0.0107253	2.5244	0.138116	<0.0001*	-0.705949	0.0631496	<0.0001*	<0.0001*	0.934976	0.0650241
	Connecticut	8	-0.534283	0.992423	0.613419	4.47941	3.888	0.301367	-2.97299	3.71549	0.459929	<0.0001*	0.967652	0.032348
	Dakota Territory	14	0.0285309	0.171629	0.870987	2.01036	0.308338	<0.0001*	-0.408685	0.161643	0.0280573	<0.0001*	0.927877	0.0721225
	District Of Columbia	6	-0.183908	0.692964	0.807898	3.35541	3.41437	0.398204	-3.69481	3.88463	0.411704	0.0247234	0.858555	0.141445
	Florida	68	-0.576581	0.136918	0.0001*	3.79712	0.402396	<0.0001*	-1.37966	0.272455	<0.0001*	<0.0001*	0.882388	0.117612
	Florida Territory	15	0.591615	0.64199	0.374928	2.08107	0.854646	0.0314437	-1.59888	0.279653	0.0001*	0.0121486	0.440628	0.559372
	Georgia	162	0.382243	0.19264	0.048951	1.54311	0.555129	0.00609686	-0.744609	0.379036	0.0512177	<0.0001*	0.775964	0.224036
	Hawaii	5	-0.220589	0.167675	0.318888	2.46084	0.591035	0.0531294	-1.03568	0.447975	0.146945	0.00769347	0.984613	0.0153869
	Hawaii Territory	5	1.13356	1.18345	0.439221	-0.658475	3.58412	0.871173	-0.132774	2.50581	0.962559	0.0651362	0.869728	0.130272
	Idaho	44	0.395881	0.164662	0.02081	1.97197	0.177342	<0.0001*	-1.10554	0.0793342	<0.0001*	<0.0001*	0.916303	0.0836968
	Idaho Territory	9	0.13012	1.16451	0.914675	2.49788	2.18285	0.296079	-0.638515	0.872555	0.491886	0.00592521	0.758728	0.241272
	Illinois	102	-0.303269	0.103802	0.00431408	3.72352	0.358032	<0.0001*	-2.44351	0.284179	<0.0001*	<0.0001*	0.935833	0.064167
	Indiana	92	-0.292402	0.236189	0.218971	3.79286	0.76451	<0.0001*	-2.65968	0.598095	<0.0001*	<0.0001*	0.877309	0.122691
	Iowa	99	1.49932	0.336528	<0.0001*	-1.63189	0.883367	0.0677765	1.16825	0.553321	0.0373405	<0.0001*	0.798927	0.201073
	Kansas	106	0.297354	0.0794334	0.0003*	1.48706	0.157191	<0.0001*	-0.773605	0.0702126	<0.0001*	<0.0001*	0.913982	0.0860178
	Kentucky	120	-0.346314	0.28587	0.228167	3.78457	0.89444	<0.0001*	-2.48707	0.664531	0.0003*	<0.0001*	0.758167	0.241833
	Louisiana	65	-0.0439109	0.174763	0.802444	2.62808	0.521395	<0.0001*	-1.30532	0.364584	0.0007*	<0.0001*	0.821823	0.178177
	Maine	16	-0.0842752	0.447292	0.853463	2.44759	0.952044	0.0232551	-1.47652	0.450422	0.0059952	<0.0001*	0.89978	0.10022
	Maryland	24	-0.835526	0.128784	<0.0001*	6.21046	0.586126	<0.0001*	-4.8958	0.604771	<0.0001*	<0.0001*	0.957709	0.0422906
	Massachusetts	20	-0.0507198	0.0486232	0.3115	2.24035	0.153966	<0.0001*	-0.621759	0.129013	0.000160178	<0.0001*	0.983217	0.0167831
	Michigan	86	0.167511	0.0502459	0.00128172	1.85879	0.121306	<0.0001*	-0.660245	0.0817606	<0.0001*	<0.0001*	0.949965	0.0500353
	Michigan Territory	7	-0.306726	0.254717	0.2949	1.89118	0.480463	0.0170146	-0.223184	0.19171	0.309056	0.0002*	0.981057	0.0189426
	Minnesota	89	0.187811	0.0608678	0.00273289	1.83915	0.138086	<0.0001*	-0.816549	0.0957169	<0.0001*	<0.0001*	0.88032	0.11968
	Mississippi	82	2.20417	0.693435	0.00211327	-2.71831	1.5951	0.0922813	1.57845	0.907367	0.0858251	<0.0001*	0.545036	0.454964
	Missouri	115	-0.298973	0.0730375	0.0001*	3.36415	0.25704	<0.0001*	-1.81814	0.187936	<0.0001*	<0.0001*	0.898958	0.101042
	Montana	57	0.747238	0.245231	0.00357163	1.88187	0.183098	<0.0001*	-1.24637	0.080533	<0.0001*	<0.0001*	0.76965	0.23035
	Montana Territory	10	-0.637222	0.874527	0.489871	1.42228	2.44301	0.578703	-1.31972	1.36148	0.364674	0.00834692	0.672437	0.327563
	Nebraska	95	0.215658	0.0429398	<0.0001*	1.76172	0.0622191	<0.0001*	-0.899304	0.0382488	<0.0001*	<0.0001*	0.949625	0.0503749
	Nevada	19	-0.201242	0.0948106	0.0497454	2.1918	0.104011	<0.0001*	-0.123138	0.123414	0.333247	<0.0001*	0.962291	0.0377095
	New Hampshire	10	1.64021	0.360938	0.00265406	-1.59831	0.92105	0.126268	1.16132	0.559853	0.0767242	<0.0001*	0.98365	0.0163495
	New Jersey	21	-0.353602	0.159582	0.039833	3.61507	0.776232	0.0002*	-1.86732	0.897677	0.0520713	<0.0001*	0.958141	0.0418592
	New Mexico	33	-0.0623234	0.206196	0.764544	2.4088	0.308693	<0.0001*	-1.06957	0.122333	<0.0001*	<0.0001*	0.834135	0.165865
	New Mexico Territory	20	-0.161938	1.71968	0.926077	2.04454	0.739598	0.0132614	-0.523495	0.207657	0.0219829	0.00330637	0.429227	0.570773
	New York	62	-0.142284	0.0565056	0.0145343	2.94596	0.265286	<0.0001*	-1.8703	0.271359	<0.0001*	<0.0001*	0.946803	0.0531974
	North Carolina	100	-0.299284	0.260941	0.254228	3.60928	0.73107	<0.0001*	-2.05308	0.500374	0.0001*	<0.0001*	0.842927	0.157073
	North Dakota	53	0.842098	0.385942	0.0338415	1.137	0.388719	0.00516676	-0.783322	0.0966005	<0.0001*	<0.0001*	0.700354	0.299646
	Ohio	88	-0.808129	0.165293	<0.0001*	5.67349	0.607056	<0.0001*	-4.29797	0.529805	<0.0001*	<0.0001*	0.935441	0.0645592
	Oklahoma	77	0.438113	0.162088	0.00852025	1.12241	0.386702	0.00487473	-0.814224	0.224602	0.0005*	<0.0001*	0.786468	0.213532
	Oklahoma Territory	8	-1.37541	0.383057	0.0156977	2.94735	0.219775	<0.0001*	-0.948142	0.24067	0.0109643	<0.0001*	0.96897	0.0310299
	Oregon	36	-0.155148	0.0760008	0.0492736	2.63574	0.130638	<0.0001*	-0.712228	0.0659556	<0.0001*	<0.0001*	0.96955	0.0304498
	Pennsylvania	67	-0.146349	0.107178	0.176884	2.91041	0.400227	<0.0001*	-1.61473	0.355731	<0.0001*	<0.0001*	0.905235	0.0947648
	Rhode Island	5	-0.263568	0.79648	0.772161	2.96041	3.35086	0.470177	-1.00827	3.46454	0.798436	0.0250638	0.949872	0.0501276
	South Carolina	47	0.86395	1.00699	0.395569	0.85611	2.59188	0.742737	-0.715582	1.64214	0.66514	<0.0001*	0.639776	0.360224
	South Dakota	72	0.341619	0.135752	0.0141818	1.56132	0.118797	<0.0001*	-1.04144	0.0720757	<0.0001*	<0.0001*	0.788901	0.211099
	Tennessee	96	0.220246	0.362094	0.544501	2.27087	1.03277	0.0303716	-1.45574	0.71236	0.0438271	<0.0001*	0.744745	0.255255
	Texas	256	0.120621	0.0400115	0.00283436	2.0997	0.0659548	<0.0001*	-0.670093	0.0338998	<0.0001*	<0.0001*	0.938336	0.0616643
	Utah	29	-0.134033	0.149471	0.378101	2.58506	0.250077	<0.0001*	-0.836955	0.101039	<0.0001*	<0.0001*	0.932234	0.0677657
	Utah Territory	23	-0.0152371	0.201833	0.940572	2.03544	0.214888	<0.0001*	-0.613826	0.158605	0.000952966	<0.0001*	0.836878	0.163122
	Vermont	14	2.20383	0.575119	0.00278495	-1.97021	1.19553	0.127595	0.559662	0.622126	0.387605	<0.0001*	0.915147	0.0848532
	Virginia	185	-0.0271297	0.0674736	0.688098	2.12877	0.258678	<0.0001*	-1.0237	0.199105	<0.0001*	<0.0001*	0.87735	0.12265
	Washington	40	-0.0510067	0.197532	0.797668	2.57539	0.433088	<0.0001*	-1.07413	0.19978	<0.0001*	<0.0001*	0.915243	0.0847569
	Washington Territory	22	0.16429	0.334367	0.62881	2.22306	0.453394	0.0001*	-0.392294	0.139001	0.0108826	<0.0001*	0.860805	0.139195
	West Virginia	55	-0.151983	0.316743	0.633359	2.91537	0.896888	0.00202332	-1.92399	0.609242	0.00264469	<0.0001*	0.845644	0.154356
	Wisconsin	73	0.189259	0.0676726	0.00666087	1.89809	0.170202	<0.0001*	-1.02059	0.12577	<0.0001*	<0.0001*	0.90319	0.0968096
	Wyoming	24	0.121446	0.306567	0.695993	2.16597	0.301992	<0.0001*	-0.847844	0.110288	<0.0001*	<0.0001*	0.743113	0.256887
	Wyoming Territory	5	-3.41436	0.385557	0.0125126	-5.00863	0.904141	0.0310753	-3.93841	0.501371	0.0158224	0.00177232	0.996455	0.00354464
