# Supplementary material for: Analyzing and interpreting spatial and temporal variability of the United States county population distributions using Taylor's law
Source: PLoS One. 2019 Dec 11;14(12):e0226096. doi: 10.1371/journal.pone.0226096 (PMC6905577; doi:10.1371/journal.pone.0226096)
Supplement: S7 Table — (XLSX) [file pone.0226096.s059.xlsx]

## Sheet: Sheet1
Table S7. Summary of the regression statistics of the Taylor's law (TL) (eqn 1) and quadratic Taylor's law (QTL) (eqn 2) models using county population density. Notations are defined in the caption of Table 1.
measure	model	number of tests	average				proportion of p-value < 0.05		proportion of p-value < 0.05/number of tests
			n	N	adj. R2 of eqn 1	adj. R2 of eqn 2	b in eqn 1	e in eqn 2	b in eqn 1	e in eqn 2
density	spatial hierarchical (Q)TL	23	50	42	0.86	0.87	23/23 (100%)	3/23 (13%)	23/23 (100%)	1/23 (4%)
	spatial (Q)TL	55	53	17	0.91	0.94	54/55 (98%)	36/55 (65%)	50/55 (91%)	28/55 (51%)
	temporal (Q)TL	64	12	53	0.84	0.84	63/64 (98%)	29/64 (45%)	55/64 (86%)	8/64 (13%)
