# Supplementary material for: Analyzing and interpreting spatial and temporal variability of the United States county population distributions using Taylor's law
Source: PLoS One. 2019 Dec 11;14(12):e0226096. doi: 10.1371/journal.pone.0226096 (PMC6905577; doi:10.1371/journal.pone.0226096)
Supplement: S8 Table — (XLSX) [file pone.0226096.s060.xlsx]

## Sheet: Definitions
Table S8. Summary statistics of county area, county count and county density in each state and census. Spreadsheet "Definitions" lists the definitions of all 15 statistics
Definitions
This spreadsheet has 15 pages that summarize the moments of area, count, and density by county in each state and census.
In each page of this spreadsheet, column A is headed "state" and the rows 2, 3, … 82 list all including ALL 81 states, regardless of how many counties they have and how many censuses included them. and columns B, C, D are headed 1790, 1800, …, 2010, one column for each census.
Each page has the following information in row s and column t :
1. Number of counties in row (state) s and column (census) t
2. Mean area of counties in row (state) s and column (census) t
3. Variance of area of counties in row (state) s and column (census) t
4. Skewness of area of counties in row (state) s and column (census) t
5. Kurtosis of area of counties in row (state) s and column (census) t
6. Mean population count of counties in row (state) s and column (census) t
7. Variance of population count of counties in row (state) s and column (census) t
8. Skewness of population count of counties in row (state) s and column (census) t
9. Kurtosis of population count of counties in row (state) s and column (census) t
10. Mean population density of counties in row (state) s and column (census) t
11. Variance of population density of counties in row (state) s and column (census) t
12. Skewness of population density of counties in row (state) s and column (census) t
13. Kurtosis of population density of counties in row (state) s and column (census) t
14. Covariance (over space) of area and population count of counties in row (state) s and column (census) t
15. Correlation (over space) of area and population count of counties in row (state) s and column (census) t

## Sheet: num
STATE	1790	1800	1810	1820	1830	1840	1850	1860	1870	1880	1890	1900	1910	1920	1930	1940	1950	1960	1970	1980	1990	2000	2010
Alabama	0	0	0	27	36	49	52	52	65	66	66	66	67	67	67	67	67	67	67	67	67	67	67
Alaska	0	0	0	0	0	0	0	0	0	0	0	0	0	0	0	0	0	24	29	23	25	27	29
Alaska Territory	0	0	0	0	0	0	0	0	0	2	2	2	0	4	4	4	4	0	0	0	0	0	0
Arizona	0	0	0	0	0	0	0	0	0	0	0	0	0	14	14	14	14	14	14	14	15	15	15
Arizona Territory	0	0	0	0	0	0	0	0	4	7	10	14	13	0	0	0	0	0	0	0	0	0	0
Arkansas	0	0	0	0	0	39	51	55	61	74	75	75	75	75	75	75	75	75	75	75	75	75	75
Arkansas Territory	0	0	0	7	23	0	0	0	0	0	0	0	0	0	0	0	0	0	0	0	0	0	0
California	0	0	0	0	0	0	24	44	50	52	54	57	58	58	58	58	58	58	58	58	58	58	58
Colorado	0	0	0	0	0	0	0	0	0	31	56	57	60	63	63	63	63	63	63	63	63	63	64
Colorado Territory	0	0	0	0	0	0	0	0	21	0	0	0	0	0	0	0	0	0	0	0	0	0	0
Connecticut	8	8	8	8	8	8	8	8	8	8	8	8	8	8	8	8	8	8	8	8	8	8	8
Dakota Territory	0	0	0	0	0	0	0	0	15	96	0	0	0	0	0	0	0	0	0	0	0	0	0
Delaware	3	3	3	3	3	3	3	3	3	3	3	3	3	3	3	3	3	3	3	3	3	3	3
District Of Columbia	0	1	5	0	5	5	3	0	1	0	1	0	1	1	1	1	1	1	1	1	1	1	1
Florida	0	0	0	0	0	0	28	37	39	39	45	45	47	54	67	67	67	67	67	67	67	67	67
Florida Territory	0	0	0	0	16	20	0	0	0	0	0	0	0	0	0	0	0	0	0	0	0	0	0
Georgia	11	24	38	47	76	93	95	132	132	137	137	137	146	155	161	159	159	159	159	159	159	159	159
Hawaii	0	0	0	0	0	0	0	0	0	0	0	0	0	0	0	0	0	5	4	5	5	5	5
Hawaii Territory	0	0	0	0	0	0	0	0	0	0	0	6	5	5	4	4	4	0	0	0	0	0	0
Idaho	0	0	0	0	0	0	0	0	0	0	18	21	23	44	44	45	45	44	44	44	44	44	44
Idaho Territory	0	0	0	0	0	0	0	0	9	13	0	0	0	0	0	0	0	0	0	0	0	0	0
Illinois	0	0	0	19	49	87	99	102	102	102	102	102	102	102	102	102	102	102	102	102	102	102	102
Illinois Territory	0	0	2	0	0	0	0	0	0	0	0	0	0	0	0	0	0	0	0	0	0	0	0
Indian Territory	0	0	0	0	0	0	0	0	0	0	0	12	0	0	0	0	0	0	0	0	0	0	0
Indiana	0	0	0	35	63	87	91	92	92	92	92	92	92	92	92	92	92	92	92	92	92	92	92
Indiana Territory	0	4	4	0	0	0	0	0	0	0	0	0	0	0	0	0	0	0	0	0	0	0	0
Iowa	0	0	0	0	0	0	49	97	98	99	99	99	99	99	99	99	99	99	99	99	99	99	99
Iowa Territory	0	0	0	0	0	18	0	0	0	0	0	0	0	0	0	0	0	0	0	0	0	0	0
Kansas	0	0	0	0	0	0	0	0	64	104	106	105	105	105	105	105	105	105	105	105	105	105	105
Kansas Territory	0	0	0	0	0	0	0	42	0	0	0	0	0	0	0	0	0	0	0	0	0	0	0
Kentucky	0	42	54	67	83	90	100	109	115	117	119	119	119	120	120	120	120	120	120	120	120	120	120
Louisiana	0	0	0	25	31	38	47	48	53	58	60	59	60	64	64	64	64	64	64	64	64	64	64
Louisiana Territory	0	0	7	0	0	0	0	0	0	0	0	0	0	0	0	0	0	0	0	0	0	0	0
Maine	0	0	0	9	10	13	13	16	16	16	16	16	16	16	16	16	16	16	16	16	16	16	16
Maryland	20	20	20	20	20	20	20	22	22	24	24	24	24	24	24	24	24	24	24	24	24	24	24
Massachusetts	18	20	22	14	14	14	14	14	14	14	14	14	14	14	14	14	14	14	14	14	14	14	14
Michigan	0	0	0	0	0	32	43	62	71	78	84	83	83	83	83	83	83	83	83	83	83	83	83
Michigan Territory	0	0	4	7	16	0	0	0	0	0	0	0	0	0	0	0	0	0	0	0	0	0	0
Minnesota	0	0	0	0	0	0	0	64	72	78	80	83	86	86	87	87	87	87	87	87	87	87	87
Minnesota Territory	0	0	0	0	0	0	9	0	0	0	0	0	0	0	0	0	0	0	0	0	0	0	0
Mississippi	0	0	0	17	26	56	59	60	65	74	75	75	79	82	82	82	82	82	82	82	82	82	82
Mississippi Territory	0	3	11	0	0	0	0	0	0	0	0	0	0	0	0	0	0	0	0	0	0	0	0
Missouri	0	0	0	0	32	62	100	113	114	115	115	115	115	115	115	115	115	115	115	115	115	115	115
Missouri Territory	0	0	0	15	0	0	0	0	0	0	0	0	0	0	0	0	0	0	0	0	0	0	0
Montana	0	0	0	0	0	0	0	0	0	0	16	25	28	51	57	57	57	57	57	57	57	56	56
Montana Territory	0	0	0	0	0	0	0	0	11	11	0	0	0	0	0	0	0	0	0	0	0	0	0
Nebraska	0	0	0	0	0	0	0	0	56	70	92	90	92	93	93	93	93	93	93	93	93	93	93
Nebraska Territory	0	0	0	0	0	0	0	34	0	0	0	0	0	0	0	0	0	0	0	0	0	0	0
Nevada	0	0	0	0	0	0	0	0	15	15	16	14	15	17	17	17	17	17	17	17	17	17	17
New Hampshire	5	5	6	6	8	8	10	10	10	10	10	10	10	10	10	10	10	10	10	10	10	10	10
New Jersey	13	13	13	13	14	18	20	21	21	21	21	21	21	21	21	21	21	21	21	21	21	21	21
New Mexico	0	0	0	0	0	0	0	0	0	0	0	0	0	29	31	31	32	32	32	32	33	33	33
New Mexico Territory	0	0	0	0	0	0	7	11	13	12	14	19	26	0	0	0	0	0	0	0	0	0	0
New York	15	29	43	50	56	58	59	60	60	60	60	61	61	62	62	62	62	62	62	62	62	62	62
North Carolina	54	60	62	62	64	68	79	86	90	94	96	97	98	100	100	100	100	100	100	100	100	100	100
North Dakota	0	0	0	0	0	0	0	0	0	0	54	40	49	53	53	53	53	53	53	53	53	53	53
Northwest Territory	0	7	0	0	0	0	0	0	0	0	0	0	0	0	0	0	0	0	0	0	0	0	0
Ohio	0	0	36	59	73	79	87	88	88	88	88	88	88	88	88	88	88	88	88	88	88	88	88
Oklahoma	0	0	0	0	0	0	0	0	0	0	0	0	76	77	77	77	77	77	77	77	77	77	77
Oklahoma Territory	0	0	0	0	0	0	0	0	0	0	8	27	0	0	0	0	0	0	0	0	0	0	0
Oregon	0	0	0	0	0	0	0	19	22	23	31	33	34	36	36	36	36	36	36	36	36	36	36
Oregon Territory	0	0	0	0	0	0	10	0	0	0	0	0	0	0	0	0	0	0	0	0	0	0	0
Orleans Territory	0	0	20	0	0	0	0	0	0	0	0	0	0	0	0	0	0	0	0	0	0	0	0
Pennsylvania	21	34	42	51	51	54	63	65	66	67	67	67	67	67	67	67	67	67	67	67	67	67	67
Puerto Rico	0	0	0	0	0	0	0	0	0	0	0	0	0	0	0	0	0	0	0	0	0	0	78
Rhode Island	5	5	5	5	5	5	5	5	5	5	5	5	5	5	5	5	5	5	5	5	5	5	5
South Carolina	20	25	28	28	29	29	29	30	31	33	35	40	43	46	46	46	46	46	46	46	46	46	46
South Dakota	0	0	0	0	0	0	0	0	0	0	79	58	68	68	69	69	68	67	67	66	66	66	66
Tennessee	0	17	38	48	62	72	79	84	85	94	96	96	96	95	95	95	95	95	95	95	95	95	95
Texas	0	0	0	0	0	0	78	133	141	225	245	243	245	253	254	254	254	254	254	254	254	254	254
Utah	0	0	0	0	0	0	0	0	0	0	0	27	27	29	29	29	29	29	29	29	29	29	29
Utah Territory	0	0	0	0	0	0	7	20	20	23	25	0	0	0	0	0	0	0	0	0	0	0	0
Vermont	7	11	12	13	13	14	14	14	14	14	14	14	14	14	14	14	14	14	14	14	14	14	14
Virginia	89	93	99	106	108	119	137	148	99	99	101	118	117	120	124	124	128	130	134	136	136	135	134
Washington	0	0	0	0	0	0	0	0	0	0	34	36	38	39	39	39	39	39	39	39	39	39	39
Washington Territory	0	0	0	0	0	0	0	19	22	25	0	0	0	0	0	0	0	0	0	0	0	0	0
West Virginia	0	0	0	0	0	0	0	0	53	54	54	55	55	55	55	55	55	55	55	55	55	55	55
Wisconsin	0	0	0	0	0	0	31	58	58	63	68	70	71	71	71	71	71	71	72	72	72	72	72
Wisconsin Territory	0	0	0	0	0	22	0	0	0	0	0	0	0	0	0	0	0	0	0	0	0	0	0
Wyoming	0	0	0	0	0	0	0	0	0	0	12	14	15	22	24	24	24	24	23	23	23	23	23
Wyoming Territory	0	0	0	0	0	0	0	0	5	7	0	0	0	0	0	0	0	0	0	0	0	0	0

## Sheet: m_a
STATE	1790	1800	1810	1820	1830	1840	1850	1860	1870	1880	1890	1900	1910	1920	1930	1940	1950	1960	1970	1980	1990	2000	2010
Alabama	NA	NA	NA	3463.11	2789.72	2729.43	2571.96	2571.96	2057.57	2026.39	2026.39	2026.39	1996.15	1996.15	1996.15	1996.15	1996.15	1996.15	1996.15	1996.15	1996.15	1996.15	1996.07
Alaska	NA	NA	NA	NA	NA	NA	NA	NA	NA	NA	NA	NA	NA	NA	NA	NA	NA	62172.1	49497.1	64875.3	59685.3	55264.1	52022.8
Alaska Territory	NA	NA	NA	NA	NA	NA	NA	NA	NA	746065	746066	746066	373032	373033	373033	373033	373033	NA	NA	NA	NA	NA	NA
Arizona	NA	NA	NA	NA	NA	NA	NA	NA	NA	NA	NA	NA	NA	21089.8	21089.8	21089.8	21089.8	21089.8	21089.8	21089.8	19683.8	19683.8	19682.3
Arizona Territory	NA	NA	NA	NA	NA	NA	NA	NA	63781.6	42179.5	29525.7	22712	22712	NA	NA	NA	NA	NA	NA	NA	NA	NA	NA
Arkansas	NA	NA	NA	NA	NA	3531.62	2700.65	2504.24	2257.92	1861.26	1836.44	1836.44	1836.44	1836.44	1836.44	1836.44	1836.44	1836.44	1836.44	1836.44	1836.44	1836.44	1836.42
Arkansas Territory	NA	NA	NA	20349.7	6382.45	NA	NA	NA	NA	NA	NA	NA	NA	NA	NA	NA	NA	NA	NA	NA	NA	NA	NA
California	NA	NA	NA	NA	NA	NA	15162.7	9304.36	8187.83	7872.92	7724.37	7182.31	7058.48	7058.48	7058.48	7058.48	7058.48	7058.48	7058.48	7058.48	7058.48	7058.48	7058.18
Colorado	NA	NA	NA	NA	NA	NA	NA	NA	NA	8696.82	4901.84	4729.85	4493.36	4279.39	4279.39	4279.39	4279.39	4279.39	4279.39	4279.39	4279.39	4279.39	4212.53
Colorado Territory	NA	NA	NA	NA	NA	NA	NA	NA	12838.2	NA	NA	NA	NA	NA	NA	NA	NA	NA	NA	NA	NA	NA	NA
Connecticut	1611.29	1611.29	1609.01	1609.01	1609.01	1609.01	1609.01	1609.01	1609.01	1609.01	1609.01	1609.01	1609.01	1609.01	1609.01	1609.01	1609.01	1609.01	1609.01	1609.01	1609.01	1609.01	1607.98
Dakota Territory	NA	NA	NA	NA	NA	NA	NA	NA	24033.4	4047.74	NA	NA	NA	NA	NA	NA	NA	NA	NA	NA	NA	NA	NA
Delaware	1710.48	1710.48	1710.48	1710.48	1710.48	1710.48	1710.48	1710.48	1710.48	1710.48	1710.48	1710.48	1710.48	1710.48	1710.48	1710.48	1710.48	1710.48	1710.48	1710.48	1710.48	1710.48	1705.44
District Of Columbia	NA	242.053	48.4105	242.053	48.4105	48.4105	53.1323	159.397	159.397	159.397	159.397	159.397	159.397	159.397	159.397	159.397	159.397	159.397	159.397	159.397	159.397	159.397	159.113
Florida	NA	NA	NA	NA	NA	NA	5243.92	3968.37	3764.87	3764.87	3262.88	3262.88	3124.04	2719.07	2191.49	2191.49	2191.49	2191.49	2191.49	2191.49	2191.49	2191.49	2188.86
Florida Territory	NA	NA	NA	NA	7538.28	7341.49	NA	NA	NA	NA	NA	NA	NA	NA	NA	NA	NA	NA	NA	NA	NA	NA	NA
Georgia	3990.8	1829.12	1574.05	2122.8	2002.8	1636.7	1602.24	1153.13	1153.13	1111.04	1111.04	1111.04	1042.55	982.018	945.421	957.313	957.313	957.313	957.313	957.313	957.313	957.313	957.234
Hawaii	NA	NA	NA	NA	NA	NA	NA	NA	NA	NA	NA	NA	NA	NA	NA	NA	NA	3332.32	4165.41	3332.32	3332.32	3332.32	3331.92
Hawaii Territory	NA	NA	NA	NA	NA	NA	NA	NA	NA	NA	NA	2776.94	3332.32	3332.32	4165.41	4165.41	4165.41	NA	NA	NA	NA	NA	NA
Idaho	NA	NA	NA	NA	NA	NA	NA	NA	NA	NA	12016.3	10299.7	9404.06	4915.76	4809.82	4809.82	4809.82	4809.82	4919.14	4919.14	4919.14	4919.14	4919.14
Idaho Territory	NA	NA	NA	NA	NA	NA	NA	NA	24049.1	16637.9	NA	NA	NA	NA	NA	NA	NA	NA	NA	NA	NA	NA	NA
Illinois	NA	NA	NA	6543.96	2977.91	1677.21	1473.92	1430.57	1430.57	1430.57	1430.57	1430.57	1430.57	1430.57	1430.57	1430.57	1430.57	1430.57	1430.57	1430.57	1430.57	1430.57	1430.55
Illinois Territory	NA	NA	191834	NA	NA	NA	NA	NA	NA	NA	NA	NA	NA	NA	NA	NA	NA	NA	NA	NA	NA	NA	NA
Indian Territory	NA	NA	NA	NA	NA	NA	NA	NA	NA	NA	NA	15927.1	NA	NA	NA	NA	NA	NA	NA	NA	NA	NA	NA
Indiana	NA	NA	NA	1879.72	1368.73	1077.14	1029.8	1018.6	1018.6	1018.6	1018.6	1018.6	1018.6	1018.6	1018.6	1018.6	1018.6	1018.6	1018.6	1018.6	1018.6	1018.6	1018.7
Indiana Territory	NA	135601	8817.49	NA	NA	NA	NA	NA	NA	NA	NA	NA	NA	NA	NA	NA	NA	NA	NA	NA	NA	NA	NA
Iowa	NA	NA	NA	NA	NA	NA	1696.68	1472.14	1472.14	1472.14	1472.14	1472.14	1472.14	1472.14	1472.14	1472.14	1472.14	1472.14	1472.14	1472.14	1472.14	1472.14	1472.18
Iowa Territory	NA	NA	NA	NA	NA	9533.14	NA	NA	NA	NA	NA	NA	NA	NA	NA	NA	NA	NA	NA	NA	NA	NA	NA
Kansas	NA	NA	NA	NA	NA	NA	NA	NA	2089.07	2049	2010.34	2029.49	2029.49	2029.49	2029.49	2029.49	2029.49	2029.49	2029.49	2029.49	2029.49	2029.49	2029.52
Kansas Territory	NA	NA	NA	NA	NA	NA	NA	3401.03	NA	NA	NA	NA	NA	NA	NA	NA	NA	NA	NA	NA	NA	NA	NA
Kentucky	NA	2491.89	1938.13	1562.08	1260.95	1162.88	1046.59	960.176	910.08	894.523	879.489	879.489	879.489	872.16	872.16	872.16	872.16	872.16	872.16	872.16	872.16	872.16	872.131
Louisiana	NA	NA	NA	4775.42	3851.14	3141.72	2540.12	2487.2	2252.56	2058.37	2023.48	2023.48	1989.76	1865.4	1865.4	1865.4	1865.4	1865.4	1865.4	1865.4	1865.4	1865.4	1862.01
Louisiana Territory	NA	NA	31761	NA	NA	NA	NA	NA	NA	NA	NA	NA	NA	NA	NA	NA	NA	NA	NA	NA	NA	NA	NA
Maine	NA	NA	NA	9348.95	8414.05	6472.35	6472.35	5258.78	5258.78	5258.78	5258.78	5258.78	5258.78	5258.78	5258.78	5258.78	5258.78	5258.78	5258.78	5258.78	5258.78	5258.78	5257.1
Maryland	1293.46	1285.49	1285.49	1285.49	1285.49	1285.49	1285.49	1168.63	1117.82	1071.24	1071.24	1071.24	1071.24	1071.24	1071.24	1071.24	1071.24	1071.24	1071.24	1071.24	1071.24	1071.24	1065.75
Massachusetts	6572.02	5841.8	5258.53	1502.15	1502.15	1502.15	1502.15	1502.15	1500.91	1500.91	1500.91	1500.91	1500.91	1500.95	1500.9	1500.9	1500.9	1500.92	1500.95	1500.98	1500.98	1500.98	1499.52
Michigan	NA	NA	NA	NA	NA	4293.72	3502.18	2121.04	1955.76	1930.69	1792.78	1814.38	1814.38	1814.38	1814.38	1814.38	1814.38	1814.38	1814.38	1814.38	1814.38	1814.38	1814.36
Michigan Territory	NA	NA	17119.9	49496.6	22871.8	NA	NA	NA	NA	NA	NA	NA	NA	NA	NA	NA	NA	NA	NA	NA	NA	NA	NA
Minnesota	NA	NA	NA	NA	NA	NA	NA	3329.01	2993.59	2798.07	2731.65	2665.03	2541.07	2541.07	2511.87	2511.87	2511.87	2511.87	2511.87	2511.87	2511.87	2511.87	2511.79
Minnesota Territory	NA	NA	NA	NA	NA	NA	48132	NA	NA	NA	NA	NA	NA	NA	NA	NA	NA	NA	NA	NA	NA	NA	NA
Mississippi	NA	NA	NA	2281.35	2277.58	2204.52	2092.43	2057.55	1899.28	1668.29	1646.04	1646.04	1562.7	1505.53	1505.53	1505.53	1505.53	1505.53	1505.53	1505.53	1505.53	1505.53	1505.48
Mississippi Territory	NA	4424.34	3256.1	NA	NA	NA	NA	NA	NA	NA	NA	NA	NA	NA	NA	NA	NA	NA	NA	NA	NA	NA	NA
Missouri	NA	NA	NA	NA	5377.77	2859.27	1805.34	1597.64	1583.63	1569.86	1569.86	1569.86	1569.86	1569.86	1569.86	1569.86	1569.86	1569.86	1569.86	1569.86	1569.86	1569.86	1569.92
Missouri Territory	NA	NA	NA	9804.02	NA	NA	NA	NA	NA	NA	NA	NA	NA	NA	NA	NA	NA	NA	NA	NA	NA	NA	NA
Montana	NA	NA	NA	NA	NA	NA	NA	NA	NA	NA	23771.3	15847.5	13583.6	7457.66	6681.24	6681.24	6681.24	6681.24	6681.24	6681.24	6681.24	6800.55	6800.55
Montana Territory	NA	NA	NA	NA	NA	NA	NA	NA	34621	34576.4	NA	NA	NA	NA	NA	NA	NA	NA	NA	NA	NA	NA	NA
Nebraska	NA	NA	NA	NA	NA	NA	NA	NA	3678.61	2837.78	2201.58	2226.04	2177.65	2154.23	2154.23	2154.23	2154.23	2154.23	2154.23	2154.23	2154.23	2154.23	2154.08
Nebraska Territory	NA	NA	NA	NA	NA	NA	NA	4007.84	NA	NA	NA	NA	NA	NA	NA	NA	NA	NA	NA	NA	NA	NA	NA
Nevada	NA	NA	NA	NA	NA	NA	NA	NA	18346.9	19090.1	20453.7	20453.7	19090.1	16844.2	16844.2	16844.2	16844.2	16844.2	16844.2	16844.2	16844.2	16844.2	16845.9
New Hampshire	4800.02	4800.02	4000.01	4000.01	3000.01	3000.01	2400.01	2400.01	2400.01	2400.01	2400.01	2400.01	2400.01	2400.01	2400.01	2400.01	2400.01	2400.01	2400.01	2400.01	2400.01	2400.01	2399.31
New Jersey	1507.24	1507.24	1507.24	1507.24	1399.58	1088.56	979.707	933.054	933.054	933.054	933.054	933.054	933.054	933.054	933.054	933.054	933.054	933.054	933.054	933.054	933.054	933.059	931.413
New Mexico	NA	NA	NA	NA	NA	NA	NA	NA	NA	NA	NA	NA	NA	10859.2	10158.6	10158.6	9841.17	9841.17	9841.17	9841.17	9542.95	9542.95	9542.97
New Mexico Territory	NA	NA	NA	NA	NA	NA	14988.5	61423.9	24224.4	26243.1	22494.1	16574.6	12112.2	NA	NA	NA	NA	NA	NA	NA	NA	NA	NA
New York	7431.13	4336.13	2924.36	2514.95	2245.49	2168.06	2131.32	2095.79	2095.79	2095.79	2095.79	2061.44	2061.44	2028.19	2028.19	2028.19	2028.19	2028.19	2028.19	2028.19	2028.19	2028.19	2027.37
North Carolina	2147.7	2017.55	1952.47	2013.48	1950.56	1879.82	1618.07	1486.37	1420.31	1359.87	1331.54	1317.81	1304.36	1278.28	1278.28	1278.28	1278.28	1278.28	1278.28	1278.28	1278.28	1278.28	1277.82
North Dakota	NA	NA	NA	NA	NA	NA	NA	NA	NA	NA	3370.78	4577.7	3736.89	3454.86	3454.86	3454.86	3454.86	3454.86	3454.86	3454.86	3454.86	3454.86	3454.86
Northwest Territory	NA	24101	NA	NA	NA	NA	NA	NA	NA	NA	NA	NA	NA	NA	NA	NA	NA	NA	NA	NA	NA	NA	NA
Ohio	NA	NA	2931.42	1788.67	1445.63	1352.78	1228.39	1214.43	1214.43	1214.43	1214.43	1214.43	1214.43	1214.43	1214.43	1214.43	1214.43	1214.43	1214.43	1214.43	1214.43	1214.43	1214.38
Oklahoma	NA	NA	NA	NA	NA	NA	NA	NA	NA	NA	NA	NA	2382.06	2351.13	2351.13	2351.13	2351.13	2351.13	2351.13	2351.13	2351.13	2351.13	2351.13
Oklahoma Territory	NA	NA	NA	NA	NA	NA	NA	NA	NA	NA	3612.62	3591.09	NA	NA	NA	NA	NA	NA	NA	NA	NA	NA	NA
Oregon	NA	NA	NA	NA	NA	NA	NA	13215.9	11413.7	10917.5	8100.05	7609.13	7385.34	6975.04	6975.04	6975.04	6975.04	6975.04	6975.04	6975.04	6975.04	6975.04	6975.58
Oregon Territory	NA	NA	NA	NA	NA	NA	74278.2	NA	NA	NA	NA	NA	NA	NA	NA	NA	NA	NA	NA	NA	NA	NA	NA
Orleans Territory	NA	NA	4566.26	NA	NA	NA	NA	NA	NA	NA	NA	NA	NA	NA	NA	NA	NA	NA	NA	NA	NA	NA	NA
Pennsylvania	5543.87	3449.64	2792.57	2299.76	2299.76	2172	1861.71	1804.43	1777.09	1750.56	1750.56	1750.56	1750.56	1750.56	1750.56	1750.56	1750.56	1750.56	1750.56	1750.56	1750.56	1750.56	1750.86
Puerto Rico	NA	NA	NA	NA	NA	NA	NA	NA	NA	NA	NA	NA	NA	NA	NA	NA	NA	NA	NA	NA	NA	NA	114.628
Rhode Island	561.89	561.89	561.89	561.89	561.89	561.89	561.89	561.89	565.359	565.359	565.359	565.359	565.359	565.359	565.359	565.359	565.359	565.359	565.359	565.359	565.359	565.359	563.494
South Carolina	3984.68	3187.74	2846.2	2854.48	2756.05	2756.05	2756.05	2664.18	2578.24	2421.99	2283.59	1998.14	1858.73	1737.51	1737.51	1737.51	1737.51	1737.51	1737.51	1737.51	1737.51	1737.51	1736.69
South Dakota	NA	NA	NA	NA	NA	NA	NA	NA	NA	NA	2528.2	3504	2981.01	2937.18	2894.61	2894.61	2937.18	2981.01	2981.01	3026.18	3026.18	3026.18	3026.2
Tennessee	NA	2165.64	1868.71	1836.36	1691.84	1515.99	1381.66	1299.42	1284.13	1161.18	1136.99	1136.99	1136.99	1148.96	1148.96	1148.96	1148.96	1148.96	1148.96	1148.96	1148.96	1148.96	1148.98
Texas	NA	NA	NA	NA	NA	NA	8679.38	3226.79	3648.14	3047.43	2810.13	2821.69	2798.66	2710.16	2699.49	2699.49	2699.49	2699.49	2699.49	2699.49	2699.49	2699.49	2699.3
Utah	NA	NA	NA	NA	NA	NA	NA	NA	NA	NA	NA	8143.87	8143.87	7582.22	7582.22	7582.22	7582.22	7582.22	7582.22	7582.22	7582.22	7582.22	7582.22
Utah Territory	NA	NA	NA	NA	NA	NA	75801.5	27564.2	11117	9560.19	8795.38	NA	NA	NA	NA	NA	NA	NA	NA	NA	NA	NA	NA
Vermont	3557.2	2263.67	2075.03	1915.42	1915.42	1778.6	1778.6	1778.6	1778.6	1778.6	1778.6	1778.6	1778.6	1778.6	1778.6	1778.6	1778.6	1778.6	1778.6	1778.6	1778.6	1778.6	1779.02
Virginia	3115.81	1788.53	1680.13	1569.18	1540.12	1397.76	1214.72	1124.43	1047.08	1047.08	1026.35	885.993	878.484	856.704	835.977	835.977	816.229	797.393	773.591	762.214	762.214	767.86	773.421
Washington	NA	NA	NA	NA	NA	NA	NA	NA	NA	NA	5143.81	4858.04	4602.36	4484.35	4484.35	4484.35	4484.35	4484.35	4484.35	4484.35	4484.35	4484.35	4484.2
Washington Territory	NA	NA	NA	NA	NA	NA	NA	25753.4	7949.52	6995.58	NA	NA	NA	NA	NA	NA	NA	NA	NA	NA	NA	NA	NA
West Virginia	NA	NA	NA	NA	NA	NA	NA	NA	1184.05	1162.13	1162.13	1141	1141	1141	1141	1141	1141	1141	1141	1141	1141	1141	1141.01
Wisconsin	NA	NA	NA	NA	NA	NA	4687.16	2505.21	2505.21	2306.38	2136.79	2075.74	2046.51	2046.51	2046.51	2046.51	2046.51	2046.51	2018.08	2018.08	2018.08	2018.08	2018.07
Wisconsin Territory	NA	NA	NA	NA	NA	7278.94	NA	NA	NA	NA	NA	NA	NA	NA	NA	NA	NA	NA	NA	NA	NA	NA	NA
Wyoming	NA	NA	NA	NA	NA	NA	NA	NA	NA	NA	19536.3	18140.9	16931.5	11544.2	10555.6	10555.6	10555.6	10555.6	11014.5	11014.5	11014.5	11014.5	11014.5
Wyoming Territory	NA	NA	NA	NA	NA	NA	NA	NA	50666.7	36281.7	NA	NA	NA	NA	NA	NA	NA	NA	NA	NA	NA	NA	NA

## Sheet: v_a
STATE	1790	1800	1810	1820	1830	1840	1850	1860	1870	1880	1890	1900	1910	1920	1930	1940	1950	1960	1970	1980	1990	2000	2010
Alabama	NA	NA	NA	6.51145e+06	769189	608618	325682	327300	325627	317254	319627	314068	318220	318340	317802	317671	317671	317671	317669	317669	317669	317669	317304
Alaska	NA	NA	NA	NA	NA	NA	NA	NA	NA	NA	NA	NA	NA	NA	NA	NA	NA	3.82376e+09	3.62051e+09	8.77496e+09	7.94248e+09	6.60489e+09	6.32618e+09
Alaska Territory	NA	NA	NA	NA	NA	NA	NA	NA	NA	4.71083e+10	4.71063e+10	4.71063e+10	4.55737e+10	4.55727e+10	5.34985e+10	5.34985e+10	5.88145e+10	NA	NA	NA	NA	NA	NA
Arizona	NA	NA	NA	NA	NA	NA	NA	NA	NA	NA	NA	NA	NA	1.44344e+08	1.44344e+08	1.44344e+08	1.44344e+08	1.44344e+08	1.44344e+08	1.44344e+08	1.39815e+08	1.39815e+08	1.39764e+08
Arizona Territory	NA	NA	NA	NA	NA	NA	NA	NA	3.90463e+09	5.13133e+08	3.55399e+08	1.26048e+08	1.26048e+08	NA	NA	NA	NA	NA	NA	NA	NA	NA	NA
Arkansas	NA	NA	NA	NA	NA	4.13317e+06	366713	178688	260753	137539	111354	120171	114140	114316	113862	113862	113862	113862	113862	113862	113862	113862	113890
Arkansas Territory	NA	NA	NA	5.21707e+07	1.30594e+07	NA	NA	NA	NA	NA	NA	NA	NA	NA	NA	NA	NA	NA	NA	NA	NA	NA	NA
California	NA	NA	NA	NA	NA	NA	6.34006e+08	1.6028e+08	1.18616e+08	9.52671e+07	9.3755e+07	6.98922e+07	6.49371e+07	6.51951e+07	6.52079e+07	6.52079e+07	6.52059e+07	6.52195e+07	6.52194e+07	6.52194e+07	6.52195e+07	6.52195e+07	6.52105e+07
Colorado	NA	NA	NA	NA	NA	NA	NA	NA	NA	6.8995e+07	1.15125e+07	1.14433e+07	9.70563e+06	7.33666e+06	7.33666e+06	7.33666e+06	7.33505e+06	7.334e+06	7.32916e+06	7.32591e+06	7.30899e+06	7.30906e+06	7.46939e+06
Colorado Territory	NA	NA	NA	NA	NA	NA	NA	NA	1.80166e+08	NA	NA	NA	NA	NA	NA	NA	NA	NA	NA	NA	NA	NA	NA
Connecticut	310719	280154	248864	248864	215681	215681	215681	215681	215681	215681	224863	224863	224863	224863	224863	224863	224863	224863	224863	224863	224863	224863	224879
Dakota Territory	NA	NA	NA	NA	NA	NA	NA	NA	5.5974e+09	1.04086e+07	NA	NA	NA	NA	NA	NA	NA	NA	NA	NA	NA	NA	NA
Delaware	458849	458849	458849	458849	458849	458849	468148	468148	468148	468148	468148	468148	468148	468148	468148	468148	468148	468148	468148	468148	468148	468148	459160
District Of Columbia	NA	NA	1704.4	NA	1704.4	1704.4	2655.9	NA	NA	NA	NA	NA	NA	NA	NA	NA	NA	NA	NA	NA	NA	NA	NA
Florida	NA	NA	NA	NA	NA	NA	2.51776e+07	1.55176e+07	1.25984e+07	1.28436e+07	8.0746e+06	8.05462e+06	4.90703e+06	3.77516e+06	1.25092e+06	1.25074e+06	1.25102e+06	1.25127e+06	1.15826e+06	1.15822e+06	1.15822e+06	1.15831e+06	1.1563e+06
Florida Territory	NA	NA	NA	NA	7.86188e+07	8.09204e+07	NA	NA	NA	NA	NA	NA	NA	NA	NA	NA	NA	NA	NA	NA	NA	NA	NA
Georgia	5.83163e+06	1.29764e+06	610829	6.79509e+06	2.69814e+06	1.259e+06	1.22615e+06	343414	341821	336275	336275	336275	240650	195255	158707	157220	157222	157300	157301	157304	157316	157320	157356
Hawaii	NA	NA	NA	NA	NA	NA	NA	NA	NA	NA	NA	NA	NA	NA	NA	NA	NA	1.68671e+07	1.79312e+07	1.68671e+07	1.68671e+07	1.68671e+07	1.6878e+07
Hawaii Territory	NA	NA	NA	NA	NA	NA	NA	NA	NA	NA	NA	1.46347e+07	1.68671e+07	1.68671e+07	1.79312e+07	1.79312e+07	1.79312e+07	NA	NA	NA	NA	NA	NA
Idaho	NA	NA	NA	NA	NA	NA	NA	NA	NA	NA	7.33911e+07	4.22571e+07	3.70593e+07	2.02051e+07	1.9843e+07	1.9843e+07	1.9843e+07	1.9843e+07	1.97871e+07	1.97871e+07	1.97871e+07	1.97871e+07	1.97876e+07
Idaho Territory	NA	NA	NA	NA	NA	NA	NA	NA	2.43109e+08	1.88065e+08	NA	NA	NA	NA	NA	NA	NA	NA	NA	NA	NA	NA	NA
Illinois	NA	NA	NA	1.33291e+08	1.49932e+07	657449	448851	334865	334931	334931	334931	334931	334931	334931	334931	334931	334931	334931	334931	334931	334931	334931	335041
Illinois Territory	NA	NA	5.06518e+10	NA	NA	NA	NA	NA	NA	NA	NA	NA	NA	NA	NA	NA	NA	NA	NA	NA	NA	NA	NA
Indian Territory	NA	NA	NA	NA	NA	NA	NA	NA	NA	NA	NA	9.73742e+07	NA	NA	NA	NA	NA	NA	NA	NA	NA	NA	NA
Indiana	NA	NA	NA	1.04196e+07	1.3505e+06	127036	86657.9	63056.8	63025	63025	63025	63025	63025	63025	63025	63025	63025	63025	63025	63025	63025	63025	63026.5
Indiana Territory	NA	2.72181e+10	7.37167e+07	NA	NA	NA	NA	NA	NA	NA	NA	NA	NA	NA	NA	NA	NA	NA	NA	NA	NA	NA	NA
Iowa	NA	NA	NA	NA	NA	NA	2.07591e+06	93297.6	93535.9	93535.9	93535.9	93535.9	93535.9	93535.9	93535.9	93535.9	93535.9	93535.9	93535.9	93535.9	93535.9	93535.9	93491
Iowa Territory	NA	NA	NA	NA	NA	1.14906e+09	NA	NA	NA	NA	NA	NA	NA	NA	NA	NA	NA	NA	NA	NA	NA	NA	NA
Kansas	NA	NA	NA	NA	NA	NA	NA	NA	598253	500388	295341	307420	307420	307420	307420	307420	307420	307449	307398	307398	307398	307398	307392
Kansas Territory	NA	NA	NA	NA	NA	NA	NA	9.82382e+07	NA	NA	NA	NA	NA	NA	NA	NA	NA	NA	NA	NA	NA	NA	NA
Kentucky	NA	5.49069e+06	2.66257e+06	1.75553e+06	362723	298715	207131	158254	150298	135076	128710	128736	128736	114409	114409	114413	114413	114413	114413	114413	114413	114413	114411
Louisiana	NA	NA	NA	3.81398e+07	2.02444e+07	8.1323e+06	4.73429e+06	4.08841e+06	2.52847e+06	2.10181e+06	1.88896e+06	1.88842e+06	1.81328e+06	733239	686815	686927	686927	686927	686927	686928	686919	686920	685754
Louisiana Territory	NA	NA	2.95429e+08	NA	NA	NA	NA	NA	NA	NA	NA	NA	NA	NA	NA	NA	NA	NA	NA	NA	NA	NA	NA
Maine	NA	NA	NA	6.88652e+07	6.92385e+07	1.9444e+07	2.10209e+07	2.30199e+07	2.30212e+07	2.30212e+07	2.30519e+07	2.30519e+07	2.30179e+07	2.30041e+07	2.30041e+07	2.30041e+07	2.30041e+07	2.30041e+07	2.30041e+07	2.30521e+07	2.30521e+07	2.30521e+07	2.30532e+07
Maryland	431982	431371	431371	431371	431371	259589	259589	303299	278799	153959	147483	147483	148021	130791	130791	130791	130791	130791	130791	130791	130791	130801	131016
Massachusetts	8.5774e+07	7.20058e+07	6.07112e+07	1.07497e+06	1.06992e+06	1.07061e+06	1.07133e+06	1.07235e+06	1.06407e+06	1.05424e+06	1.05424e+06	1.05424e+06	1.05451e+06	1.05281e+06	1.05296e+06	1.06876e+06	1.06876e+06	1.06869e+06	1.06862e+06	1.06851e+06	1.06851e+06	1.06851e+06	1.06951e+06
Michigan	NA	NA	NA	NA	NA	6.30287e+07	3.5231e+07	2.40445e+06	1.7385e+06	1.66868e+06	660168	466642	466642	466642	466642	466642	466642	466642	466642	466642	466642	466642	466482
Michigan Territory	NA	NA	3.84776e+08	2.73335e+09	9.01905e+08	NA	NA	NA	NA	NA	NA	NA	NA	NA	NA	NA	NA	NA	NA	NA	NA	NA	NA
Minnesota	NA	NA	NA	NA	NA	NA	NA	2.12683e+07	1.48927e+07	1.09662e+07	9.68719e+06	8.4795e+06	6.03356e+06	6.03356e+06	5.19152e+06	5.19146e+06	5.19146e+06	5.19146e+06	5.19146e+06	5.19146e+06	5.19146e+06	5.19146e+06	5.1902e+06
Minnesota Territory	NA	NA	NA	NA	NA	NA	1.81556e+09	NA	NA	NA	NA	NA	NA	NA	NA	NA	NA	NA	NA	NA	NA	NA	NA
Mississippi	NA	NA	NA	1.58723e+06	1.6652e+06	698897	250432	248468	272259	280832	225956	227237	169669	133878	133613	133613	133613	133613	133613	133613	133613	133613	133551
Mississippi Territory	NA	1.60845e+06	1.10897e+07	NA	NA	NA	NA	NA	NA	NA	NA	NA	NA	NA	NA	NA	NA	NA	NA	NA	NA	NA	NA
Missouri	NA	NA	NA	NA	6.81175e+07	4.48153e+06	609410	155056	174782	172743	172743	172743	172743	172743	172743	172743	172743	172743	172743	172743	172743	172743	172620
Missouri Territory	NA	NA	NA	1.03227e+08	NA	NA	NA	NA	NA	NA	NA	NA	NA	NA	NA	NA	NA	NA	NA	NA	NA	NA	NA
Montana	NA	NA	NA	NA	NA	NA	NA	NA	NA	NA	5.94255e+08	2.06016e+08	1.25387e+08	1.47638e+07	1.16542e+07	1.16542e+07	1.16542e+07	1.16542e+07	1.16542e+07	1.16542e+07	1.16542e+07	1.11933e+07	1.11935e+07
Montana Territory	NA	NA	NA	NA	NA	NA	NA	NA	6.92074e+08	8.52088e+08	NA	NA	NA	NA	NA	NA	NA	NA	NA	NA	NA	NA	NA
Nebraska	NA	NA	NA	NA	NA	NA	NA	NA	7.00267e+07	2.75623e+07	3.78347e+06	3.87631e+06	3.53992e+06	3.46235e+06	3.46235e+06	3.46235e+06	3.46235e+06	3.46235e+06	3.46235e+06	3.46235e+06	3.46235e+06	3.46235e+06	3.46257e+06
Nebraska Territory	NA	NA	NA	NA	NA	NA	NA	1.38922e+08	NA	NA	NA	NA	NA	NA	NA	NA	NA	NA	NA	NA	NA	NA	NA
Nevada	NA	NA	NA	NA	NA	NA	NA	NA	3.43656e+08	3.22719e+08	3.19767e+08	3.198e+08	2.42377e+08	1.8655e+08	1.85602e+08	1.85602e+08	1.85602e+08	1.85602e+08	1.85602e+08	1.85602e+08	1.85602e+08	1.85602e+08	1.85914e+08
New Hampshire	9.33418e+06	9.33418e+06	822772	823121	2.19595e+06	2.19418e+06	1.99162e+06	1.74471e+06	1.66646e+06	1.66647e+06	1.66647e+06	1.66647e+06	1.66647e+06	1.66647e+06	1.66647e+06	1.66647e+06	1.66647e+06	1.66647e+06	1.66647e+06	1.66647e+06	1.66647e+06	1.66647e+06	1.66396e+06
New Jersey	653024	653024	653024	653024	565480	416628	227027	254697	254061	253892	253892	244884	245730	245730	246505	246505	246505	246505	246505	246505	246502	246494	243890
New Mexico	NA	NA	NA	NA	NA	NA	NA	NA	NA	NA	NA	NA	NA	4.16419e+07	1.93257e+07	1.93257e+07	2.17628e+07	1.99675e+07	1.99675e+07	1.99675e+07	2.02443e+07	2.02443e+07	2.0246e+07
New Mexico Territory	NA	NA	NA	NA	NA	NA	4.43205e+08	2.25125e+09	2.34845e+08	3.06869e+08	2.7401e+08	7.71212e+07	5.50132e+07	NA	NA	NA	NA	NA	NA	NA	NA	NA	NA
New York	1.87895e+08	2.31694e+07	4.29504e+06	2.11023e+06	1.69642e+06	1.68863e+06	1.66276e+06	1.65697e+06	1.65697e+06	1.65544e+06	1.65537e+06	1.69005e+06	1.69003e+06	1.72985e+06	1.72985e+06	1.72985e+06	1.72985e+06	1.72985e+06	1.72987e+06	1.72987e+06	1.72987e+06	1.72988e+06	1.72974e+06
North Carolina	1.17416e+06	1.17751e+06	842331	1.05449e+06	841932	592235	450465	341963	347112	291368	285339	282422	272603	251344	253595	253595	253595	253595	253595	253595	253593	253595	253195
North Dakota	NA	NA	NA	NA	NA	NA	NA	NA	NA	NA	2.56001e+06	1.34521e+07	3.70837e+06	1.55258e+06	1.55258e+06	1.55258e+06	1.55258e+06	1.55258e+06	1.55258e+06	1.55258e+06	1.55258e+06	1.55258e+06	1.55241e+06
Northwest Territory	NA	8.16943e+08	NA	NA	NA	NA	NA	NA	NA	NA	NA	NA	NA	NA	NA	NA	NA	NA	NA	NA	NA	NA	NA
Ohio	NA	NA	5.099e+06	1.5538e+06	108943	103186	58372.1	53913.6	53913.6	54015	54015	54015	54015	54015	54015	54015	54015	54015	54026.3	54026.3	54026.3	54017.3	54063.1
Oklahoma	NA	NA	NA	NA	NA	NA	NA	NA	NA	NA	NA	NA	1.0199e+06	944863	943403	943403	943403	943403	943403	943403	943403	943403	943619
Oklahoma Territory	NA	NA	NA	NA	NA	NA	NA	NA	NA	NA	2.32817e+07	1.13108e+07	NA	NA	NA	NA	NA	NA	NA	NA	NA	NA	NA
Oregon	NA	NA	NA	NA	NA	NA	NA	1.49208e+09	2.06862e+08	1.64754e+08	5.24447e+07	4.9643e+07	4.95429e+07	4.20978e+07	4.21006e+07	4.21006e+07	4.20984e+07	4.20984e+07	4.20985e+07	4.20985e+07	4.20984e+07	4.20989e+07	4.20976e+07
Oregon Territory	NA	NA	NA	NA	NA	NA	1.04608e+10	NA	NA	NA	NA	NA	NA	NA	NA	NA	NA	NA	NA	NA	NA	NA	NA
Orleans Territory	NA	NA	2.88485e+07	NA	NA	NA	NA	NA	NA	NA	NA	NA	NA	NA	NA	NA	NA	NA	NA	NA	NA	NA	NA
Pennsylvania	4.94421e+07	1.36684e+07	2.30403e+06	1.12042e+06	1.1143e+06	851675	553794	590061	546034	499244	499244	499244	499244	499244	499244	499244	499244	499244	499244	499244	499244	499244	498667
Puerto Rico	NA	NA	NA	NA	NA	NA	NA	NA	NA	NA	NA	NA	NA	NA	NA	NA	NA	NA	NA	NA	NA	NA	3484.68
Rhode Island	164947	164947	164947	164947	164947	164947	164947	164947	182191	182191	182191	182191	182191	182191	182191	182191	182191	182191	190707	190707	190707	190707	190650
South Carolina	1.03311e+07	3.38391e+06	1.65666e+06	1.69215e+06	1.48245e+06	1.43556e+06	1.43556e+06	1.29449e+06	1.32671e+06	862813	597166	415017	377530	335840	328129	328112	328112	327828	327433	324504	324504	324504	324955
South Dakota	NA	NA	NA	NA	NA	NA	NA	NA	NA	NA	1.22963e+06	1.33766e+07	5.37711e+06	3.05413e+06	2.92498e+06	2.92498e+06	3.06006e+06	3.18242e+06	3.18242e+06	3.26979e+06	3.26979e+06	3.26979e+06	3.26983e+06
Tennessee	NA	907201	601796	1.03367e+06	146156	143405	140355	134221	135687	161726	156773	154693	154259	152447	153103	153268	152731	152816	152816	152637	152644	152643	152775
Texas	NA	NA	NA	NA	NA	NA	1.56477e+09	3.17347e+07	6.47922e+07	1.53981e+07	4.64555e+06	5.3203e+06	4.62417e+06	2.91135e+06	2.89818e+06	2.89811e+06	2.89807e+06	2.89801e+06	2.89806e+06	2.89806e+06	2.89806e+06	2.89806e+06	2.89797e+06
Utah	NA	NA	NA	NA	NA	NA	NA	NA	NA	NA	NA	3.31871e+07	3.31871e+07	3.16903e+07	3.17588e+07	3.17588e+07	3.17588e+07	3.17588e+07	3.17588e+07	3.17588e+07	3.17588e+07	3.17588e+07	3.17688e+07
Utah Territory	NA	NA	NA	NA	NA	NA	4.29578e+10	8.81561e+08	7.67145e+07	5.40342e+07	3.55948e+07	NA	NA	NA	NA	NA	NA	NA	NA	NA	NA	NA	NA
Vermont	5.63152e+06	97350.9	309446	284049	267211	252928	246038	245383	246037	246037	246037	245647	245647	245647	245647	245647	245647	245647	245647	245647	245647	245647	245910
Virginia	3.45724e+07	4.32369e+06	2.29556e+06	1.61832e+06	1.39422e+06	911038	529385	333255	248259	248259	247766	336915	339916	348765	355899	354416	357626	360738	364465	365272	358911	357320	355670
Washington	NA	NA	NA	NA	NA	NA	NA	NA	NA	NA	1.91458e+07	1.17059e+07	8.18736e+06	7.23762e+06	7.23762e+06	7.23762e+06	7.23762e+06	7.23762e+06	7.23762e+06	7.23762e+06	7.23816e+06	7.23816e+06	7.23873e+06
Washington Territory	NA	NA	NA	NA	NA	NA	NA	6.74103e+09	2.21594e+08	7.01281e+07	NA	NA	NA	NA	NA	NA	NA	NA	NA	NA	NA	NA	NA
West Virginia	NA	NA	NA	NA	NA	NA	NA	NA	354594	330315	327897	298426	298426	298426	298426	298426	298426	298426	298426	298426	298426	298426	298431
Wisconsin	NA	NA	NA	NA	NA	NA	3.01359e+07	7.20818e+06	7.00278e+06	2.33427e+06	1.05444e+06	793199	658608	658499	658499	658499	658499	658499	647737	647737	647737	647737	647646
Wisconsin Territory	NA	NA	NA	NA	NA	1.9085e+08	NA	NA	NA	NA	NA	NA	NA	NA	NA	NA	NA	NA	NA	NA	NA	NA	NA
Wyoming	NA	NA	NA	NA	NA	NA	NA	NA	NA	NA	1.49174e+08	7.67946e+07	5.78694e+07	5.67294e+07	3.51198e+07	3.51198e+07	3.51198e+07	3.5109e+07	3.79045e+07	3.79045e+07	3.79045e+07	3.79045e+07	3.79083e+07
Wyoming Territory	NA	NA	NA	NA	NA	NA	NA	NA	6.20635e+08	4.7871e+08	NA	NA	NA	NA	NA	NA	NA	NA	NA	NA	NA	NA	NA

## Sheet: s_a
STATE	1790	1800	1810	1820	1830	1840	1850	1860	1870	1880	1890	1900	1910	1920	1930	1940	1950	1960	1970	1980	1990	2000	2010
Alabama	NA	NA	NA	2.821	1.07305	1.43858	1.65478	1.64398	1.38322	1.53826	1.55082	1.6168	1.66064	1.66574	1.66605	1.66787	1.66787	1.66787	1.66789	1.66789	1.66789	1.66789	1.66232
Alaska	NA	NA	NA	NA	NA	NA	NA	NA	NA	NA	NA	NA	NA	NA	NA	NA	NA	1.27867	1.61413	2.61182	2.90433	2.89433	2.96937
Alaska Territory	NA	NA	NA	NA	NA	NA	NA	NA	NA	1.17568e-15	0	0	-0.397562	-0.397595	-0.0121595	-0.0121595	0.166599	NA	NA	NA	NA	NA	NA
Arizona	NA	NA	NA	NA	NA	NA	NA	NA	NA	NA	NA	NA	NA	0.537276	0.537276	0.537276	0.537276	0.537276	0.537276	0.537276	0.836679	0.836679	0.836812
Arizona Territory	NA	NA	NA	NA	NA	NA	NA	NA	1.17444	0.482631	1.16729	0.567251	0.567251	NA	NA	NA	NA	NA	NA	NA	NA	NA	NA
Arkansas	NA	NA	NA	NA	NA	3.41011	0.574382	-0.302434	0.178499	1.0877	0.930246	0.914541	0.957585	0.955377	0.949704	0.949704	0.949704	0.949704	0.949704	0.949704	0.949704	0.949704	0.948375
Arkansas Territory	NA	NA	NA	0.82631	1.06749	NA	NA	NA	NA	NA	NA	NA	NA	NA	NA	NA	NA	NA	NA	NA	NA	NA	NA
California	NA	NA	NA	NA	NA	NA	2.70614	2.62097	3.36793	2.93119	2.97926	3.16837	3.40124	3.42021	3.41963	3.41963	3.41981	3.42126	3.42124	3.42124	3.42124	3.42123	3.42181
Colorado	NA	NA	NA	NA	NA	NA	NA	NA	NA	1.1651	1.60344	1.66869	1.81086	1.00439	1.00439	1.00439	1.00545	1.00616	1.00925	1.01128	1.01875	1.01872	0.984818
Colorado Territory	NA	NA	NA	NA	NA	NA	NA	NA	1.55456	NA	NA	NA	NA	NA	NA	NA	NA	NA	NA	NA	NA	NA	NA
Connecticut	0.421369	0.308258	0.0471661	0.0471661	0.367505	0.367505	0.367505	0.367505	0.367505	0.367505	0.330083	0.330083	0.330083	0.330083	0.330083	0.330083	0.330083	0.330083	0.330083	0.330083	0.330083	0.330083	0.335528
Dakota Territory	NA	NA	NA	NA	NA	NA	NA	NA	3.55928	3.92003	NA	NA	NA	NA	NA	NA	NA	NA	NA	NA	NA	NA	NA
Delaware	0.463986	0.463986	0.463986	0.463986	0.463986	0.463986	0.409937	0.409937	0.409937	0.409937	0.409937	0.409937	0.409937	0.409937	0.409937	0.409937	0.409937	0.409937	0.409937	0.409937	0.409937	0.409937	0.411681
District Of Columbia	NA	NA	0.320069	NA	0.320069	0.320069	0.152876	NA	NA	NA	NA	NA	NA	NA	NA	NA	NA	NA	NA	NA	NA	NA	NA
Florida	NA	NA	NA	NA	NA	NA	1.61833	2.40351	2.58908	2.343	3.02682	3.03768	2.23185	2.63252	1.73639	1.7371	1.7365	1.73639	1.51977	1.51994	1.51994	1.51976	1.52472
Florida Territory	NA	NA	NA	NA	1.79493	2.84549	NA	NA	NA	NA	NA	NA	NA	NA	NA	NA	NA	NA	NA	NA	NA	NA	NA
Georgia	1.22985	3.19746	1.9506	3.35911	2.3315	3.1289	3.14247	1.25507	1.26511	1.20905	1.20905	1.20905	1.10043	1.17021	0.984206	0.965306	0.965347	0.965297	0.965303	0.965243	0.96524	0.965205	0.966534
Hawaii	NA	NA	NA	NA	NA	NA	NA	NA	NA	NA	NA	NA	NA	NA	NA	NA	NA	1.25795	1.06907	1.25795	1.25795	1.25795	1.25687
Hawaii Territory	NA	NA	NA	NA	NA	NA	NA	NA	NA	NA	NA	1.63654	1.25796	1.25796	1.06907	1.06907	1.06907	NA	NA	NA	NA	NA	NA
Idaho	NA	NA	NA	NA	NA	NA	NA	NA	NA	NA	1.30173	1.16766	1.55662	2.41282	2.34236	2.34236	2.34236	2.34236	2.36008	2.36008	2.36008	2.36008	2.36016
Idaho Territory	NA	NA	NA	NA	NA	NA	NA	NA	0.622118	1.31228	NA	NA	NA	NA	NA	NA	NA	NA	NA	NA	NA	NA	NA
Illinois	NA	NA	NA	2.36018	3.57185	1.31443	1.14218	0.684778	0.684633	0.684633	0.684633	0.684633	0.684633	0.684633	0.684633	0.684633	0.684633	0.684633	0.684633	0.684633	0.684633	0.684633	0.685329
Illinois Territory	NA	NA	3.10144e-16	NA	NA	NA	NA	NA	NA	NA	NA	NA	NA	NA	NA	NA	NA	NA	NA	NA	NA	NA	NA
Indian Territory	NA	NA	NA	NA	NA	NA	NA	NA	NA	NA	NA	-0.327081	NA	NA	NA	NA	NA	NA	NA	NA	NA	NA	NA
Indiana	NA	NA	NA	4.03492	3.3957	3.31857	0.952592	-0.512074	-0.511885	-0.511885	-0.511885	-0.511885	-0.511885	-0.511885	-0.511885	-0.511885	-0.511885	-0.511885	-0.511885	-0.511885	-0.511885	-0.511885	-0.509364
Indiana Territory	NA	0.748089	0.943424	NA	NA	NA	NA	NA	NA	NA	NA	NA	NA	NA	NA	NA	NA	NA	NA	NA	NA	NA	NA
Iowa	NA	NA	NA	NA	NA	NA	6.21763	1.14217	1.05	1.05	1.05	1.05	1.05	1.05	1.05	1.05	1.05	1.05	1.05	1.05	1.05	1.05	1.04938
Iowa Territory	NA	NA	NA	NA	NA	3.8794	NA	NA	NA	NA	NA	NA	NA	NA	NA	NA	NA	NA	NA	NA	NA	NA	NA
Kansas	NA	NA	NA	NA	NA	NA	NA	NA	1.55722	2.69417	0.236595	0.304073	0.304073	0.304073	0.304073	0.304073	0.304073	0.303539	0.304243	0.304243	0.304243	0.304243	0.305587
Kansas Territory	NA	NA	NA	NA	NA	NA	NA	6.13102	NA	NA	NA	NA	NA	NA	NA	NA	NA	NA	NA	NA	NA	NA	NA
Kentucky	NA	1.81029	2.05725	3.20363	1.22717	0.560087	0.565122	0.794655	0.90434	0.930641	1.03228	1.03248	1.03248	0.830255	0.830255	0.830173	0.830173	0.830173	0.830173	0.830173	0.830173	0.830173	0.830226
Louisiana	NA	NA	NA	2.15849	2.12214	1.92217	3.08585	2.98806	2.33729	2.83747	3.03117	3.03299	3.21487	0.936123	0.652804	0.652441	0.652441	0.652441	0.652441	0.652444	0.652415	0.652409	0.651716
Louisiana Territory	NA	NA	0.812831	NA	NA	NA	NA	NA	NA	NA	NA	NA	NA	NA	NA	NA	NA	NA	NA	NA	NA	NA	NA
Maine	NA	NA	NA	1.09861	1.24886	0.936344	1.19097	1.22434	1.22421	1.22421	1.2289	1.2289	1.22382	1.22592	1.22592	1.22592	1.22592	1.22592	1.22592	1.22042	1.22042	1.22042	1.22027
Maryland	0.550382	0.588736	0.588736	0.588736	0.588736	1.22742	1.22742	0.857267	1.16962	-0.342557	-0.302562	-0.302562	-0.306107	-0.162437	-0.162437	-0.162437	-0.162437	-0.162437	-0.162437	-0.162437	-0.162437	-0.162278	-0.144129
Massachusetts	1.92822	2.15474	2.47826	0.75042	0.750642	0.760327	0.757948	0.760919	0.784053	0.811562	0.811562	0.811562	0.811329	0.817443	0.817137	0.84242	0.842421	0.84258	0.842723	0.84294	0.842946	0.842948	0.845594
Michigan	NA	NA	NA	NA	NA	3.81288	5.38833	3.04775	3.16548	3.37429	2.38297	1.95061	1.95061	1.95061	1.95061	1.95061	1.95061	1.95061	1.95061	1.95061	1.95061	1.95061	1.95026
Michigan Territory	NA	NA	0.813643	0.765392	1.12669	NA	NA	NA	NA	NA	NA	NA	NA	NA	NA	NA	NA	NA	NA	NA	NA	NA	NA
Minnesota	NA	NA	NA	NA	NA	NA	NA	2.61825	2.83571	3.17298	3.5301	3.76387	3.75628	3.75628	3.87199	3.87207	3.87207	3.87207	3.87207	3.87207	3.87207	3.87207	3.87119
Minnesota Territory	NA	NA	NA	NA	NA	NA	0.773813	NA	NA	NA	NA	NA	NA	NA	NA	NA	NA	NA	NA	NA	NA	NA	NA
Mississippi	NA	NA	NA	2.02536	2.01229	2.34821	0.79779	0.951192	1.02235	1.31355	0.878634	0.892748	0.732343	0.472603	0.474912	0.474912	0.474912	0.474912	0.474912	0.474912	0.474912	0.474912	0.475508
Mississippi Territory	NA	0.558759	2.02089	NA	NA	NA	NA	NA	NA	NA	NA	NA	NA	NA	NA	NA	NA	NA	NA	NA	NA	NA	NA
Missouri	NA	NA	NA	NA	4.24457	1.92871	1.41381	0.68847	1.16836	0.29127	0.29127	0.29127	0.29127	0.29127	0.29127	0.29127	0.29127	0.29127	0.29127	0.29127	0.29127	0.29127	0.292288
Missouri Territory	NA	NA	NA	1.07096	NA	NA	NA	NA	NA	NA	NA	NA	NA	NA	NA	NA	NA	NA	NA	NA	NA	NA	NA
Montana	NA	NA	NA	NA	NA	NA	NA	NA	NA	NA	1.14139	1.5607	1.22125	0.887842	0.666472	0.666472	0.666472	0.666472	0.666472	0.666472	0.666472	0.721311	0.721293
Montana Territory	NA	NA	NA	NA	NA	NA	NA	NA	0.609782	0.660088	NA	NA	NA	NA	NA	NA	NA	NA	NA	NA	NA	NA	NA
Nebraska	NA	NA	NA	NA	NA	NA	NA	NA	5.79383	5.26378	4.2978	4.168	4.55568	4.68425	4.68425	4.68425	4.68425	4.68425	4.68425	4.68425	4.68425	4.68425	4.68381
Nebraska Territory	NA	NA	NA	NA	NA	NA	NA	5.31031	NA	NA	NA	NA	NA	NA	NA	NA	NA	NA	NA	NA	NA	NA	NA
Nevada	NA	NA	NA	NA	NA	NA	NA	NA	1.02156	0.616379	0.508395	0.508001	0.560306	0.905319	0.923354	0.923354	0.923354	0.923354	0.923354	0.923354	0.923354	0.923354	0.928034
New Hampshire	1.44173	1.44173	0.322319	0.320544	0.481034	0.478828	1.15327	0.975285	0.91768	0.917674	0.917674	0.917674	0.917674	0.917674	0.917674	0.917674	0.917674	0.917674	0.917674	0.917674	0.917674	0.917674	0.916175
New Jersey	0.675561	0.675561	0.675561	0.675561	1.07749	1.16317	0.763526	0.647223	0.642504	0.631478	0.631478	0.48276	0.495028	0.495028	0.50315	0.50315	0.50315	0.50315	0.50315	0.50315	0.503177	0.503261	0.512414
New Mexico	NA	NA	NA	NA	NA	NA	NA	NA	NA	NA	NA	NA	NA	2.62031	0.437725	0.437725	0.250161	0.0236964	0.0236964	0.0236964	0.0679108	0.0679108	0.0677497
New Mexico Territory	NA	NA	NA	NA	NA	NA	1.90974	0.838123	0.726944	0.962355	1.55864	0.902118	1.79115	NA	NA	NA	NA	NA	NA	NA	NA	NA	NA
New York	2.94584	2.12061	1.3917	0.69156	1.04928	1.1686	1.24727	1.27352	1.27352	1.27841	1.27863	1.2488	1.24889	1.19678	1.19678	1.19678	1.19678	1.19679	1.1967	1.19671	1.19671	1.1967	1.19702
North Carolina	1.37338	1.4967	0.955765	1.22334	1.13124	0.227138	0.63226	0.472778	0.580932	0.562884	0.642444	0.688898	0.700689	0.581068	0.580339	0.580339	0.580339	0.580339	0.580339	0.580339	0.580339	0.580339	0.578778
North Dakota	NA	NA	NA	NA	NA	NA	NA	NA	NA	NA	1.96488	2.15617	2.28233	0.961679	0.961679	0.961679	0.961679	0.961679	0.961679	0.961679	0.961679	0.961679	0.961665
Northwest Territory	NA	1.83702	NA	NA	NA	NA	NA	NA	NA	NA	NA	NA	NA	NA	NA	NA	NA	NA	NA	NA	NA	NA	NA
Ohio	NA	NA	2.18406	4.51303	0.779374	0.604384	0.438533	0.510266	0.510266	0.512467	0.512467	0.512467	0.512467	0.512467	0.512467	0.512467	0.512467	0.512467	0.512939	0.512939	0.512938	0.512385	0.50525
Oklahoma	NA	NA	NA	NA	NA	NA	NA	NA	NA	NA	NA	NA	1.51891	1.63378	1.6406	1.6406	1.6406	1.6406	1.6406	1.6406	1.6406	1.6406	1.64082
Oklahoma Territory	NA	NA	NA	NA	NA	NA	NA	NA	NA	NA	1.81587	2.05546	NA	NA	NA	NA	NA	NA	NA	NA	NA	NA	NA
Oregon	NA	NA	NA	NA	NA	NA	NA	3.97369	1.7623	1.53579	1.31418	1.45291	1.50236	1.77128	1.77113	1.77113	1.77139	1.77139	1.77139	1.77139	1.77139	1.77135	1.77121
Oregon Territory	NA	NA	NA	NA	NA	NA	1.47501	NA	NA	NA	NA	NA	NA	NA	NA	NA	NA	NA	NA	NA	NA	NA	NA
Orleans Territory	NA	NA	1.56362	NA	NA	NA	NA	NA	NA	NA	NA	NA	NA	NA	NA	NA	NA	NA	NA	NA	NA	NA	NA
Pennsylvania	2.84955	3.95812	1.78844	1.25287	1.2528	0.565138	0.103073	0.140632	0.217784	0.116566	0.116566	0.116566	0.116566	0.116566	0.116566	0.116566	0.116566	0.116566	0.116566	0.116566	0.116566	0.116566	0.118732
Puerto Rico	NA	NA	NA	NA	NA	NA	NA	NA	NA	NA	NA	NA	NA	NA	NA	NA	NA	NA	NA	NA	NA	NA	1.29919
Rhode Island	0.1106	0.1106	0.1106	0.1106	0.1106	0.1106	0.1106	0.1106	0.200049	0.200049	0.200049	0.200049	0.200049	0.200049	0.200049	0.200049	0.200049	0.200049	0.197551	0.197551	0.197551	0.197551	0.201104
South Carolina	1.49236	1.02365	0.651781	0.663065	0.804566	0.796046	0.796046	1.01271	1.09772	1.48674	1.17616	0.745776	0.638344	0.792713	0.748094	0.747864	0.747864	0.748365	0.751009	0.766918	0.766918	0.766918	0.771276
South Dakota	NA	NA	NA	NA	NA	NA	NA	NA	NA	NA	0.65939	2.6151	1.80786	1.48241	1.51897	1.51897	1.4133	1.3723	1.3723	1.2815	1.2815	1.2815	1.28161
Tennessee	NA	1.00189	1.82967	4.58686	0.837741	-0.347122	-0.24858	-0.148537	-0.158517	-0.126284	-0.0892184	-0.110831	-0.12302	-0.165726	-0.162171	-0.161735	-0.163496	-0.162969	-0.162969	-0.162814	-0.162776	-0.16278	-0.161427
Texas	NA	NA	NA	NA	NA	NA	8.458	11.5237	8.43523	6.16423	6.19056	5.80801	5.90595	4.26188	4.28925	4.28938	4.28953	4.28969	4.28955	4.28955	4.28955	4.28955	4.28903
Utah	NA	NA	NA	NA	NA	NA	NA	NA	NA	NA	NA	0.699289	0.699289	0.900623	0.891544	0.891544	0.891544	0.891544	0.891544	0.891544	0.891544	0.891544	0.891199
Utah Territory	NA	NA	NA	NA	NA	NA	2.2677	0.832746	0.454152	0.565177	0.52279	NA	NA	NA	NA	NA	NA	NA	NA	NA	NA	NA	NA
Vermont	0.896839	0.00215285	-1.95948	-1.32843	-1.41401	-0.857673	-0.977215	-0.982311	-0.978843	-0.978843	-0.978843	-0.979725	-0.979725	-0.979725	-0.979725	-0.979725	-0.979725	-0.979725	-0.979725	-0.979725	-0.979725	-0.979725	-0.978142
Virginia	4.83353	4.27655	2.00344	1.58688	1.82142	1.57445	1.47948	0.900337	0.727986	0.727986	0.716045	0.37513	0.376296	0.386526	0.405398	0.410762	0.434036	0.452082	0.483058	0.503632	0.482141	0.477478	0.471354
Washington	NA	NA	NA	NA	NA	NA	NA	NA	NA	NA	1.73734	1.272	1.08256	1.16187	1.16187	1.16187	1.16187	1.16187	1.16187	1.16187	1.16184	1.16184	1.1618
Washington Territory	NA	NA	NA	NA	NA	NA	NA	3.8559	3.84212	2.13166	NA	NA	NA	NA	NA	NA	NA	NA	NA	NA	NA	NA	NA
West Virginia	NA	NA	NA	NA	NA	NA	NA	NA	0.915598	0.91007	0.890953	0.96513	0.96513	0.96513	0.96513	0.96513	0.96513	0.96513	0.96513	0.96513	0.96513	0.96513	0.965163
Wisconsin	NA	NA	NA	NA	NA	NA	1.59041	3.5058	3.53298	2.38878	1.03136	0.785308	0.397759	0.397772	0.397772	0.397772	0.397772	0.397772	0.43582	0.43582	0.43582	0.43582	0.435932
Wisconsin Territory	NA	NA	NA	NA	NA	2.16034	NA	NA	NA	NA	NA	NA	NA	NA	NA	NA	NA	NA	NA	NA	NA	NA	NA
Wyoming	NA	NA	NA	NA	NA	NA	NA	NA	NA	NA	1.88417	0.496817	0.769507	1.43874	1.52511	1.52511	1.52511	1.52572	1.28211	1.28211	1.28211	1.28211	1.28177
Wyoming Territory	NA	NA	NA	NA	NA	NA	NA	NA	1.05507	1.73122	NA	NA	NA	NA	NA	NA	NA	NA	NA	NA	NA	NA	NA

## Sheet: k_a
STATE	1790	1800	1810	1820	1830	1840	1850	1860	1870	1880	1890	1900	1910	1920	1930	1940	1950	1960	1970	1980	1990	2000	2010
Alabama	NA	NA	NA	11.694	3.51501	4.9852	8.11435	8.04431	5.12742	5.63416	5.57585	5.7498	5.8809	5.90363	5.90713	5.91098	5.91098	5.91098	5.91105	5.91105	5.91105	5.91105	5.87732
Alaska	NA	NA	NA	NA	NA	NA	NA	NA	NA	NA	NA	NA	NA	NA	NA	NA	NA	3.61475	4.60511	9.77936	11.5391	11.4918	12.0939
Alaska Territory	NA	NA	NA	NA	NA	NA	NA	NA	NA	1	1	1	2.03279	2.0328	1.99624	1.99624	1.98579	NA	NA	NA	NA	NA	NA
Arizona	NA	NA	NA	NA	NA	NA	NA	NA	NA	NA	NA	NA	NA	3.10453	3.10453	3.10453	3.10453	3.10453	3.10453	3.10453	3.41437	3.41437	3.41605
Arizona Territory	NA	NA	NA	NA	NA	NA	NA	NA	2.74062	1.83754	3.1161	3.52137	3.52137	NA	NA	NA	NA	NA	NA	NA	NA	NA	NA
Arkansas	NA	NA	NA	NA	NA	16.7425	3.5323	3.1858	2.32612	3.61592	3.09502	2.89819	3.00162	2.98725	2.97298	2.97298	2.97298	2.97298	2.97298	2.97298	2.97298	2.97298	2.96654
Arkansas Territory	NA	NA	NA	2.31504	3.47132	NA	NA	NA	NA	NA	NA	NA	NA	NA	NA	NA	NA	NA	NA	NA	NA	NA	NA
California	NA	NA	NA	NA	NA	NA	9.1756	10.1606	16.2344	12.676	13.0041	15.8781	18.0357	18.2048	18.1987	18.1987	18.1998	18.2136	18.2134	18.2134	18.2134	18.2134	18.2177
Colorado	NA	NA	NA	NA	NA	NA	NA	NA	NA	3.17517	6.40016	6.59396	8.38285	3.88033	3.88033	3.88033	3.88034	3.88027	3.88061	3.88108	3.89097	3.8909	3.84572
Colorado Territory	NA	NA	NA	NA	NA	NA	NA	NA	4.56628	NA	NA	NA	NA	NA	NA	NA	NA	NA	NA	NA	NA	NA	NA
Connecticut	2.83266	2.61495	2.38269	2.38269	2.54833	2.54833	2.54833	2.54833	2.54833	2.54833	2.36527	2.36527	2.36527	2.36527	2.36527	2.36527	2.36527	2.36527	2.36527	2.36527	2.36527	2.36527	2.37036
Dakota Territory	NA	NA	NA	NA	NA	NA	NA	NA	13.809	26.5595	NA	NA	NA	NA	NA	NA	NA	NA	NA	NA	NA	NA	NA
Delaware	1.5	1.5	1.5	1.5	1.5	1.5	1.5	1.5	1.5	1.5	1.5	1.5	1.5	1.5	1.5	1.5	1.5	1.5	1.5	1.5	1.5	1.5	1.5
District Of Columbia	NA	NA	1.8039	NA	1.8039	1.8039	1.5	NA	NA	NA	NA	NA	NA	NA	NA	NA	NA	NA	NA	NA	NA	NA	NA
Florida	NA	NA	NA	NA	NA	NA	4.52526	8.30134	10.0441	7.66442	13.1659	13.2308	7.78071	10.2047	6.43701	6.43845	6.43582	6.4343	5.35649	5.35679	5.35678	5.356	5.37158
Florida Territory	NA	NA	NA	NA	4.70916	11.1462	NA	NA	NA	NA	NA	NA	NA	NA	NA	NA	NA	NA	NA	NA	NA	NA	NA
Georgia	4.1843	14.2537	8.03719	13.1703	8.9095	16.5237	16.9975	4.31512	4.35458	3.98029	3.98029	3.98029	3.83998	4.45155	4.12714	4.10062	4.10047	4.09726	4.09723	4.09713	4.09663	4.09641	4.1046
Hawaii	NA	NA	NA	NA	NA	NA	NA	NA	NA	NA	NA	NA	NA	NA	NA	NA	NA	2.94435	2.25797	2.94435	2.94435	2.94435	2.94271
Hawaii Territory	NA	NA	NA	NA	NA	NA	NA	NA	NA	NA	NA	3.93028	2.94436	2.94436	2.25798	2.25798	2.25798	NA	NA	NA	NA	NA	NA
Idaho	NA	NA	NA	NA	NA	NA	NA	NA	NA	NA	3.99804	4.61335	5.52859	9.02653	8.81309	8.81309	8.81309	8.81309	8.80663	8.80663	8.80663	8.80663	8.80708
Idaho Territory	NA	NA	NA	NA	NA	NA	NA	NA	2.3693	3.73597	NA	NA	NA	NA	NA	NA	NA	NA	NA	NA	NA	NA	NA
Illinois	NA	NA	NA	6.88108	16.649	5.45861	4.60445	3.09078	3.08969	3.08969	3.08969	3.08969	3.08969	3.08969	3.08969	3.08969	3.08969	3.08969	3.08969	3.08969	3.08969	3.08969	3.09227
Illinois Territory	NA	NA	1	NA	NA	NA	NA	NA	NA	NA	NA	NA	NA	NA	NA	NA	NA	NA	NA	NA	NA	NA	NA
Indian Territory	NA	NA	NA	NA	NA	NA	NA	NA	NA	NA	NA	2.20492	NA	NA	NA	NA	NA	NA	NA	NA	NA	NA	NA
Indiana	NA	NA	NA	18.4544	14.2699	24.9654	9.25637	4.23335	4.23828	4.23828	4.23828	4.23828	4.23828	4.23828	4.23828	4.23828	4.23828	4.23828	4.23828	4.23828	4.23828	4.23828	4.23495
Indiana Territory	NA	1.92931	2.13756	NA	NA	NA	NA	NA	NA	NA	NA	NA	NA	NA	NA	NA	NA	NA	NA	NA	NA	NA	NA
Iowa	NA	NA	NA	NA	NA	NA	42.0191	4.84771	4.60879	4.60879	4.60879	4.60879	4.60879	4.60879	4.60879	4.60879	4.60879	4.60879	4.60879	4.60879	4.60879	4.60879	4.60265
Iowa Territory	NA	NA	NA	NA	NA	16.0531	NA	NA	NA	NA	NA	NA	NA	NA	NA	NA	NA	NA	NA	NA	NA	NA	NA
Kansas	NA	NA	NA	NA	NA	NA	NA	NA	7.87514	18.4738	3.44447	3.4496	3.4496	3.4496	3.4496	3.4496	3.4496	3.45064	3.45009	3.45009	3.45009	3.45009	3.4497
Kansas Territory	NA	NA	NA	NA	NA	NA	NA	39.0422	NA	NA	NA	NA	NA	NA	NA	NA	NA	NA	NA	NA	NA	NA	NA
Kentucky	NA	6.0748	7.5791	14.9111	5.46238	2.65893	2.60697	3.18017	3.6243	3.98351	4.34038	4.33949	4.33949	3.73812	3.73812	3.73784	3.73784	3.73784	3.73784	3.73784	3.73784	3.73784	3.73731
Louisiana	NA	NA	NA	6.94512	7.00873	6.8201	15.4508	14.6437	10.2041	14.0668	16.4363	16.445	17.8148	4.05809	3.03049	3.02975	3.02975	3.02975	3.02975	3.02976	3.02971	3.02972	3.0361
Louisiana Territory	NA	NA	2.99019	NA	NA	NA	NA	NA	NA	NA	NA	NA	NA	NA	NA	NA	NA	NA	NA	NA	NA	NA	NA
Maine	NA	NA	NA	2.89414	3.16683	2.77833	3.63462	3.74303	3.74266	3.74266	3.76025	3.76025	3.74135	3.74457	3.74457	3.74457	3.74457	3.74457	3.74457	3.73039	3.73039	3.73039	3.72913
Maryland	3.18454	3.22193	3.22193	3.22193	3.22193	5.05304	5.05304	5.16675	6.19505	3.58712	3.41651	3.41651	3.43061	2.99377	2.99377	2.99377	2.99377	2.99377	2.99377	2.99377	2.99377	2.99349	2.96691
Massachusetts	5.57624	6.82698	8.69515	3.84689	3.87851	3.91798	3.91589	3.9226	3.9275	3.96124	3.96124	3.96124	3.95921	3.96344	3.96301	3.99098	3.99098	3.9912	3.99141	3.99171	3.99173	3.99172	3.99332
Michigan	NA	NA	NA	NA	NA	17.764	32.9875	12.6583	13.6102	16.0659	12.0325	7.64355	7.64355	7.64355	7.64355	7.64355	7.64355	7.64355	7.64355	7.64355	7.64355	7.64355	7.63799
Michigan Territory	NA	NA	2.07898	2.15112	2.56184	NA	NA	NA	NA	NA	NA	NA	NA	NA	NA	NA	NA	NA	NA	NA	NA	NA	NA
Minnesota	NA	NA	NA	NA	NA	NA	NA	8.75502	10.2658	12.6441	15.8083	17.7632	20.1201	20.1201	23.1142	23.1147	23.1147	23.1147	23.1147	23.1147	23.1147	23.1147	23.1062
Minnesota Territory	NA	NA	NA	NA	NA	NA	2.48746	NA	NA	NA	NA	NA	NA	NA	NA	NA	NA	NA	NA	NA	NA	NA	NA
Mississippi	NA	NA	NA	7.32854	7.0767	9.44061	3.90106	4.15983	4.6128	5.36384	3.38288	3.42257	3.14831	2.18972	2.1973	2.1973	2.1973	2.1973	2.1973	2.1973	2.1973	2.1973	2.19947
Mississippi Territory	NA	1.5	6.19847	NA	NA	NA	NA	NA	NA	NA	NA	NA	NA	NA	NA	NA	NA	NA	NA	NA	NA	NA	NA
Missouri	NA	NA	NA	NA	21.6073	6.62833	4.83606	3.59637	6.62328	4.23295	4.23295	4.23295	4.23295	4.23295	4.23295	4.23295	4.23295	4.23295	4.23295	4.23295	4.23295	4.23295	4.23829
Missouri Territory	NA	NA	NA	2.78701	NA	NA	NA	NA	NA	NA	NA	NA	NA	NA	NA	NA	NA	NA	NA	NA	NA	NA	NA
Montana	NA	NA	NA	NA	NA	NA	NA	NA	NA	NA	2.60941	4.84261	3.30948	3.3562	2.60499	2.60499	2.60499	2.60499	2.60499	2.60499	2.60499	2.56749	2.56744
Montana Territory	NA	NA	NA	NA	NA	NA	NA	NA	2.1754	2.02257	NA	NA	NA	NA	NA	NA	NA	NA	NA	NA	NA	NA	NA
Nebraska	NA	NA	NA	NA	NA	NA	NA	NA	38.5368	33.0294	26.6553	25.4886	29.8969	31.1321	31.1321	31.1321	31.1321	31.1321	31.1321	31.1321	31.1321	31.1321	31.1285
Nebraska Territory	NA	NA	NA	NA	NA	NA	NA	29.7813	NA	NA	NA	NA	NA	NA	NA	NA	NA	NA	NA	NA	NA	NA	NA
Nevada	NA	NA	NA	NA	NA	NA	NA	NA	3.08336	1.84796	1.77109	1.77137	2.19947	3.17626	3.19196	3.19196	3.19196	3.19196	3.19196	3.19196	3.19196	3.19196	3.20232
New Hampshire	3.17169	3.17169	1.77057	1.77085	1.48778	1.48951	2.93312	2.62692	2.5729	2.5729	2.5729	2.5729	2.5729	2.5729	2.5729	2.5729	2.5729	2.5729	2.5729	2.5729	2.5729	2.5729	2.57092
New Jersey	1.96014	1.96014	1.96014	1.96014	2.82359	4.12107	3.54734	3.26905	3.27129	3.27586	3.27586	2.77253	2.80795	2.80795	2.81484	2.81484	2.81484	2.81484	2.81484	2.81484	2.8149	2.81488	2.88737
New Mexico	NA	NA	NA	NA	NA	NA	NA	NA	NA	NA	NA	NA	NA	12.1531	2.42535	2.42535	2.55951	2.31549	2.31549	2.31549	2.3312	2.3312	2.33118
New Mexico Territory	NA	NA	NA	NA	NA	NA	4.85609	3.14136	2.85697	3.56617	5.21101	3.49982	7.18746	NA	NA	NA	NA	NA	NA	NA	NA	NA	NA
New York	10.7299	7.46609	5.53606	3.76677	5.27607	5.41575	5.61697	5.69257	5.69256	5.69577	5.69592	5.56466	5.56467	5.42736	5.42737	5.42737	5.42737	5.42737	5.42736	5.42738	5.42739	5.42737	5.42737
North Carolina	6.34993	6.87728	4.51306	4.99045	5.49505	2.78376	3.3525	2.54146	2.62466	2.58011	2.69594	2.78379	2.91538	2.62404	2.59034	2.59034	2.59034	2.59034	2.59034	2.59034	2.59036	2.59034	2.59201
North Dakota	NA	NA	NA	NA	NA	NA	NA	NA	NA	NA	7.53105	6.76726	9.76525	3.64089	3.64089	3.64089	3.64089	3.64089	3.64089	3.64089	3.64089	3.64089	3.64078
Northwest Territory	NA	4.73992	NA	NA	NA	NA	NA	NA	NA	NA	NA	NA	NA	NA	NA	NA	NA	NA	NA	NA	NA	NA	NA
Ohio	NA	NA	7.68161	27.3012	2.90716	3.78349	3.46589	3.80527	3.80527	3.79601	3.79601	3.79601	3.79601	3.79601	3.79601	3.79601	3.79601	3.79601	3.79689	3.79689	3.79689	3.79573	3.80252
Oklahoma	NA	NA	NA	NA	NA	NA	NA	NA	NA	NA	NA	NA	5.19038	5.87005	5.88395	5.88395	5.88395	5.88395	5.88395	5.88395	5.88395	5.88395	5.88425
Oklahoma Territory	NA	NA	NA	NA	NA	NA	NA	NA	NA	NA	4.75467	6.5588	NA	NA	NA	NA	NA	NA	NA	NA	NA	NA	NA
Oregon	NA	NA	NA	NA	NA	NA	NA	16.8864	5.08727	4.12697	3.64633	4.08459	4.23904	5.49908	5.49845	5.49845	5.49884	5.49884	5.49883	5.49883	5.49884	5.49874	5.49825
Oregon Territory	NA	NA	NA	NA	NA	NA	3.77261	NA	NA	NA	NA	NA	NA	NA	NA	NA	NA	NA	NA	NA	NA	NA	NA
Orleans Territory	NA	NA	4.44913	NA	NA	NA	NA	NA	NA	NA	NA	NA	NA	NA	NA	NA	NA	NA	NA	NA	NA	NA	NA
Pennsylvania	11.1684	20.1999	7.49324	6.24369	6.18026	3.20799	2.22677	2.19378	2.33926	2.1645	2.1645	2.1645	2.1645	2.1645	2.1645	2.1645	2.1645	2.1645	2.1645	2.1645	2.1645	2.1645	2.16155
Puerto Rico	NA	NA	NA	NA	NA	NA	NA	NA	NA	NA	NA	NA	NA	NA	NA	NA	NA	NA	NA	NA	NA	NA	5.62571
Rhode Island	1.56946	1.56946	1.56946	1.56946	1.56946	1.56946	1.56946	1.56946	1.57536	1.57536	1.57536	1.57536	1.57536	1.57536	1.57536	1.57536	1.57536	1.57536	1.49244	1.49244	1.49244	1.49244	1.49434
South Carolina	3.78733	3.19037	1.97885	1.98997	2.35336	2.43754	2.43754	2.99825	3.13362	5.47179	4.47543	3.10703	2.67455	2.9199	2.81102	2.81018	2.81018	2.81482	2.82032	2.87483	2.87483	2.87483	2.87912
South Dakota	NA	NA	NA	NA	NA	NA	NA	NA	NA	NA	3.37372	10.3078	6.11203	4.8215	5.09461	5.09461	4.64988	4.39488	4.39488	4.11211	4.11211	4.11211	4.11299
Tennessee	NA	3.37371	5.93087	27.6214	5.93314	3.05268	2.211	2.01943	2.13147	2.12174	2.15711	2.17815	2.16825	2.19316	2.19036	2.18804	2.18947	2.18881	2.18881	2.19185	2.19164	2.19166	2.19255
Texas	NA	NA	NA	NA	NA	NA	73.8928	139.166	73.6553	41.9301	54.152	45.7433	50.3759	26.4384	26.6796	26.6808	26.6816	26.6826	26.6818	26.6818	26.6818	26.6818	26.6768
Utah	NA	NA	NA	NA	NA	NA	NA	NA	NA	NA	NA	2.3582	2.3582	2.7522	2.73704	2.73704	2.73704	2.73704	2.73704	2.73704	2.73704	2.73704	2.73592
Utah Territory	NA	NA	NA	NA	NA	NA	6.14263	2.49043	2.02802	1.83984	2.01587	NA	NA	NA	NA	NA	NA	NA	NA	NA	NA	NA	NA
Vermont	1.87805	1.86694	6.50382	4.8887	5.44855	4.43262	4.48746	4.50962	4.48582	4.48582	4.48582	4.50336	4.50336	4.50336	4.50336	4.50336	4.50336	4.50336	4.50336	4.50336	4.50336	4.50336	4.5032
Virginia	30.9586	27.9901	7.46116	5.58385	7.82635	5.91941	6.25989	3.90228	3.95496	3.95496	4.14589	3.25147	3.21365	3.12685	3.06579	3.06952	3.00262	2.94506	2.91239	2.90605	2.81305	2.82482	2.83427
Washington	NA	NA	NA	NA	NA	NA	NA	NA	NA	NA	5.65796	4.52113	4.7237	5.55383	5.55383	5.55383	5.55383	5.55383	5.55383	5.55383	5.5531	5.5531	5.55249
Washington Territory	NA	NA	NA	NA	NA	NA	NA	16.2217	17.0249	6.89554	NA	NA	NA	NA	NA	NA	NA	NA	NA	NA	NA	NA	NA
West Virginia	NA	NA	NA	NA	NA	NA	NA	NA	3.81174	3.72478	3.68267	4.17618	4.17618	4.17618	4.17618	4.17618	4.17618	4.17618	4.17618	4.17618	4.17618	4.17618	4.17633
Wisconsin	NA	NA	NA	NA	NA	NA	4.06083	15.295	15.7209	10.4927	3.95466	3.82093	2.7123	2.71284	2.71284	2.71284	2.71284	2.71284	2.82274	2.82274	2.82274	2.82274	2.82295
Wisconsin Territory	NA	NA	NA	NA	NA	5.78673	NA	NA	NA	NA	NA	NA	NA	NA	NA	NA	NA	NA	NA	NA	NA	NA	NA
Wyoming	NA	NA	NA	NA	NA	NA	NA	NA	NA	NA	6.21236	1.90644	2.66746	4.01906	4.557	4.557	4.557	4.55979	3.76879	3.76879	3.76879	3.76879	3.76799
Wyoming Territory	NA	NA	NA	NA	NA	NA	NA	NA	2.6923	4.53571	NA	NA	NA	NA	NA	NA	NA	NA	NA	NA	NA	NA	NA

## Sheet: m_c
STATE	1790	1800	1810	1820	1830	1840	1850	1860	1870	1880	1890	1900	1910	1920	1930	1940	1950	1960	1970	1980	1990	2000	2010
Alabama	NA	NA	NA	5345.07	8597.97	12056.2	14838.9	18542.3	15338.3	19128.9	22924.5	27707.5	31911.8	35047.4	39496.2	42283	45697.7	48757.3	51405.4	58117.7	60307.3	66374.6	71339.3
Alaska	NA	NA	NA	NA	NA	NA	NA	NA	NA	NA	NA	NA	NA	NA	NA	NA	NA	9423.62	10358	17471.8	22001.7	23219.7	24490.7
Alaska Territory	NA	NA	NA	NA	NA	NA	NA	NA	NA	16713	16026	31796	NA	13759	14819.5	18131	32160.8	NA	NA	NA	NA	NA	NA
Arizona	NA	NA	NA	NA	NA	NA	NA	NA	NA	NA	NA	NA	NA	23868.7	31112.4	35661.5	53541.9	93011.5	126493	194158	244349	342042	426134
Arizona Territory	NA	NA	NA	NA	NA	NA	NA	NA	2414.5	5777.14	5962	8780.79	15719.5	NA	NA	NA	NA	NA	NA	NA	NA	NA	NA
Arkansas	NA	NA	NA	NA	NA	2501.9	4115.63	7917.27	7942.15	10844.9	15042.4	17487.5	20992.7	23362.7	24726.4	25991.8	25460.1	23817	25643.9	30485.8	31343	35645.3	38878.9
Arkansas Territory	NA	NA	NA	2039	1321.22	NA	NA	NA	NA	NA	NA	NA	NA	NA	NA	NA	NA	NA	NA	NA	NA	NA	NA
California	NA	NA	NA	NA	NA	NA	3858.21	8636.23	11204.9	16628.7	22372.8	26053.6	40992.2	59083.8	97883.6	119093	182521	270986	344020	408067	513104	583994	642310
Colorado	NA	NA	NA	NA	NA	NA	NA	NA	NA	6268.61	7360.68	9468.42	13317.1	14914.7	16441.1	17830.1	21033.2	27840.4	35035.9	45872.4	52292	68274	78581.2
Colorado Territory	NA	NA	NA	NA	NA	NA	NA	NA	1898.29	NA	NA	NA	NA	NA	NA	NA	NA	NA	NA	NA	NA	NA	NA
Connecticut	29706.9	31375.2	32742.8	34406	37209.4	38747.2	46349	57518.4	67181.8	77837.5	93282.2	113552	139344	172579	200863	213655	250910	316904	378964	388447	410890	425696	446762
Dakota Territory	NA	NA	NA	NA	NA	NA	NA	NA	945.4	1408.09	NA	NA	NA	NA	NA	NA	NA	NA	NA	NA	NA	NA	NA
Delaware	19698.7	21424.3	24224.7	24249.7	25582.7	26028.3	30510.7	37405.3	41671.7	48869.3	56164.3	61578.3	67440.7	74334.3	79460	88835	106028	148764	182701	198113	222056	261200	299311
District Of Columbia	NA	4971	4804.6	NA	7966.8	8742.4	17229	NA	131700	NA	230392	NA	331069	437571	486869	663091	802178	763956	756510	638333	606900	572059	601723
Florida	NA	NA	NA	NA	NA	NA	3123.04	3795.24	4814.05	6910.08	8698.27	11745.4	16013.2	17934.6	21913.6	28319.6	41362.8	73903.9	101335	145468	193103	238543	280617
Florida Territory	NA	NA	NA	NA	2170.62	2723.85	NA	NA	NA	NA	NA	NA	NA	NA	NA	NA	NA	NA	NA	NA	NA	NA	NA
Georgia	7504.36	6778.58	6642.97	7255.09	6800.3	7434.32	9538.79	8009.74	8970.52	11256.8	13411.3	16177.6	17870.7	18682.8	18065.3	19646.1	21664	24799.5	28865.3	34359.2	40743.5	51487.1	60928.6
Hawaii	NA	NA	NA	NA	NA	NA	NA	NA	NA	NA	NA	NA	NA	NA	NA	NA	NA	126554	192140	192938	221646	242307	272060
Hawaii Territory	NA	NA	NA	NA	NA	NA	NA	NA	NA	NA	NA	25666.8	38381.8	51182.4	92084	105832	124948	NA	NA	NA	NA	NA	NA
Idaho	NA	NA	NA	NA	NA	NA	NA	NA	NA	NA	4688.06	7703.43	14156.3	9815.14	10114.4	11663.8	13080.8	15163.4	16194.7	21453.1	22880.7	29408	35626.9
Idaho Territory	NA	NA	NA	NA	NA	NA	NA	NA	1666.56	2508.46	NA	NA	NA	NA	NA	NA	NA	NA	NA	NA	NA	NA	NA
Illinois	NA	NA	NA	2905.84	3213.16	5473.37	8600.71	16783.8	24900.9	30175.2	37513.2	47270.1	55280.3	63581.2	74810.3	77423.9	85413.5	98834.9	108961	112025	112065	121758	125791
Illinois Territory	NA	NA	6141	NA	NA	NA	NA	NA	NA	NA	NA	NA	NA	NA	NA	NA	NA	NA	NA	NA	NA	NA	NA
Indian Territory	NA	NA	NA	NA	NA	NA	NA	NA	NA	NA	NA	32671.7	NA	NA	NA	NA	NA	NA	NA	NA	NA	NA	NA
Indiana	NA	NA	NA	4205.09	5444.94	7883.52	10861.7	14678.6	18267.8	21503.3	23830.5	27352.8	29357.3	31852.1	35201.1	37258.7	42763.3	50679.3	56452.9	59676.3	60262.6	66092.2	70476.1
Indiana Territory	NA	1410.25	6130	NA	NA	NA	NA	NA	NA	NA	NA	NA	NA	NA	NA	NA	NA	NA	NA	NA	NA	NA	NA
Iowa	NA	NA	NA	NA	NA	NA	3922.73	6957.87	12183.9	16410.3	19312.1	22544	22472.4	24283	24959	25639.1	26475.5	27853.9	28529.1	29432.4	28048	29558.8	30771.3
Iowa Territory	NA	NA	NA	NA	NA	2395.11	NA	NA	NA	NA	NA	NA	NA	NA	NA	NA	NA	NA	NA	NA	NA	NA	NA
Kansas	NA	NA	NA	NA	NA	NA	NA	NA	5693.73	9577.85	13463.2	14004.7	16104.3	16850.1	17914.3	17152.6	18145.7	20748.7	21396	22511.2	23595.9	25604	27172.6
Kansas Territory	NA	NA	NA	NA	NA	NA	NA	3368.64	NA	NA	NA	NA	NA	NA	NA	NA	NA	NA	NA	NA	NA	NA	NA
Kentucky	NA	5260.83	7527.98	8422.64	8288.16	8664.76	9824.05	10602.6	11487.1	14091.4	15618.8	18043.5	19242.9	20138.6	21788.2	23713.6	24540	25318	26822.5	30506.5	30710.8	33681.4	36161.4
Louisiana	NA	NA	NA	6136.28	6952.55	9273.97	11016.2	14750	13715.4	16206	18643.1	23417.4	27606.5	28101.7	32837.4	36935.6	41929.9	50891	56895.4	65717.2	65937.1	69827.8	70833.9
Louisiana Territory	NA	NA	2977.86	NA	NA	NA	NA	NA	NA	NA	NA	NA	NA	NA	NA	NA	NA	NA	NA	NA	NA	NA	NA
Maine	NA	NA	NA	33148.3	39945.5	38599.5	44859.2	39267.4	39182.2	40558.5	41317.9	43404.1	46398.2	48000.9	49838.9	52951.6	57110.9	60579.1	62003	70291.2	76745.5	79682.7	83022.6
Maryland	15986.4	17077.4	19027.3	20367.5	22352	23501	29151.7	31229.5	35495.2	38956	43432.9	49501.8	53972.8	60402.5	67980.2	75885.2	97625	129195	163433	175707	199228	220687	240565
Massachusetts	52799.9	57456.4	63704.1	37377.6	43600.6	52692.8	71036.7	87933.3	104096	127363	159924	200382	240458	275168	303544	308337	335037	367756	406369	409788	429745	453507	467688
Michigan	NA	NA	NA	NA	NA	6633.34	9247.77	12082.5	16676.9	20986.4	24927.2	29168.5	33857.5	44197.7	58341.3	63326.6	76768.3	94255.3	106929	111591	111992	119740	119080
Michigan Territory	NA	NA	1190.5	1270.86	1977.44	NA	NA	NA	NA	NA	NA	NA	NA	NA	NA	NA	NA	NA	NA	NA	NA	NA	NA
Minnesota	NA	NA	NA	NA	NA	NA	NA	2687.86	6107.03	10009.9	16272.8	21101.1	24136.1	27757.3	29470.7	32095.4	34281.4	39239.8	43735.3	46850.2	50288.5	56545.7	60964.7
Minnesota Territory	NA	NA	NA	NA	NA	NA	675.222	NA	NA	NA	NA	NA	NA	NA	NA	NA	NA	NA	NA	NA	NA	NA	NA
Mississippi	NA	NA	NA	4438.12	5254.65	6708.05	10280.1	13188.4	12737.3	15291.9	17194.7	20683.6	22748.3	21836.8	24510	26631.7	26572.1	26562.7	27035.5	30739.5	31380.7	34691	36186.5
Mississippi Territory	NA	2950	3668.36	NA	NA	NA	NA	NA	NA	NA	NA	NA	NA	NA	NA	NA	NA	NA	NA	NA	NA	NA	NA
Missouri	NA	NA	NA	NA	4389.22	6188.74	6820.44	10460.3	15099.1	18855.5	23297.3	27014.5	28637.7	29600.5	31559.7	32910.1	34388.3	37563.6	40665.2	42753.8	44496.3	48654	52077.6
Missouri Territory	NA	NA	NA	4439.07	NA	NA	NA	NA	NA	NA	NA	NA	NA	NA	NA	NA	NA	NA	NA	NA	NA	NA	NA
Montana	NA	NA	NA	NA	NA	NA	NA	NA	NA	NA	8259.94	9733.16	13430.5	10762.5	9431.68	9815.02	10368.8	11838	12182.6	13801.6	14018.7	16110.6	17668.1
Montana Territory	NA	NA	NA	NA	NA	NA	NA	NA	1872.27	3559.91	NA	NA	NA	NA	NA	NA	NA	NA	NA	NA	NA	NA	NA
Nebraska	NA	NA	NA	NA	NA	NA	NA	NA	2196.3	6462.89	11509.9	11847.8	12958.8	13939.5	14816.8	14148.8	14252.8	15175.6	15951.5	16879.8	16971.9	18400.7	19638.1
Nebraska Territory	NA	NA	NA	NA	NA	NA	NA	848.265	NA	NA	NA	NA	NA	NA	NA	NA	NA	NA	NA	NA	NA	NA	NA
Nevada	NA	NA	NA	NA	NA	NA	NA	NA	2862.73	4151.07	2860.06	3023.93	5458.33	4553.35	5356.35	6485.12	9416.65	16781.1	28749.3	47087.8	70696.1	117545	158856
New Hampshire	28379.8	36771.6	35743.3	40693.5	33666	35571.8	31797.6	32607.3	31830	34699.1	37653	41158.8	43057.2	44308.3	46529.3	49152.4	53324.2	60692.1	73768.1	92061	110925	123579	131647
New Jersey	14164.5	16242.2	18889.4	21351.9	22915.9	20739.2	24477.8	32001.7	43147.4	53862.7	68806.3	89698.5	120817	150281	192444	198103	230254	288894	341341	350706	368104	400683	418662
New Mexico	NA	NA	NA	NA	NA	NA	NA	NA	NA	NA	NA	NA	NA	12425.9	13655.4	17155.4	21287.1	29719.5	31750	40715.4	45911.2	55122.6	62399.4
New Mexico Territory	NA	NA	NA	NA	NA	NA	8792.43	8501.45	7067.23	9963.75	10970.9	10279.5	12588.5	NA	NA	NA	NA	NA	NA	NA	NA	NA	NA
New York	22682.7	20312.1	22303.5	27456.2	34260.9	41877.9	52498.2	64678.9	73046	84714.5	99964.2	119162	149404	167504	203033	217406	239197	270682	294145	283195	290169	306072	312550
North Carolina	7314.91	7968.38	8959.68	10303.7	11531	11079.7	11000.5	11542.1	11904	14891	16853.6	19523.8	22513.1	25591.2	31702.8	35716.2	40619.3	45561.6	50820.6	58817.7	66286.4	80493.1	95354.8
North Dakota	NA	NA	NA	NA	NA	NA	NA	NA	NA	NA	3383.69	7978.65	11776.7	12205.1	12846.1	12112	11691.2	11932.9	11655.9	12315.4	12052.8	12117	12690.4
Northwest Territory	NA	6480.71	NA	NA	NA	NA	NA	NA	NA	NA	NA	NA	NA	NA	NA	NA	NA	NA	NA	NA	NA	NA	NA
Ohio	NA	NA	6410	9854.81	12848	19233.8	22762.4	26585.4	30287	36341.6	41730.9	47244.8	54171.8	65447.7	75530.6	78495.6	90302.6	110300	121046	122700	123263	129013	131097
Oklahoma	NA	NA	NA	NA	NA	NA	NA	NA	NA	NA	NA	NA	21804.7	26341.3	31117.4	30343.3	29004.6	30237.5	33236.7	39289.5	40851.8	44813.7	48718.8
Oklahoma Territory	NA	NA	NA	NA	NA	NA	NA	NA	NA	NA	7729.25	14753	NA	NA	NA	NA	NA	NA	NA	NA	NA	NA	NA
Oregon	NA	NA	NA	NA	NA	NA	NA	2761.32	4132.86	7598.61	10121.5	12531.4	19787.2	21760.8	26494.1	30269	42259.5	49130.2	58094	73141.8	78953.4	95038.9	106419
Oregon Territory	NA	NA	NA	NA	NA	NA	1329.4	NA	NA	NA	NA	NA	NA	NA	NA	NA	NA	NA	NA	NA	NA	NA	NA
Orleans Territory	NA	NA	3827.8	NA	NA	NA	NA	NA	NA	NA	NA	NA	NA	NA	NA	NA	NA	NA	NA	NA	NA	NA	NA
Pennsylvania	20648.1	17716.6	19287.9	20577.6	26435.9	31926.5	36695	44711	53362.9	63923.7	78477.8	94061.4	114405	130150	143751	147764	156687	168946	176028	177073	177338	183299	189588
Puerto Rico	NA	NA	NA	NA	NA	NA	NA	NA	NA	NA	NA	NA	NA	NA	NA	NA	NA	NA	NA	NA	NA	NA	47766.5
Rhode Island	13822.4	13824.4	15386.2	16611.8	19439.8	21766	29509	34924	43470.6	55306.2	69101.2	85711.2	108522	120879	137499	142669	158379	171898	189345	189431	200693	209664	210513
South Carolina	12453.6	13823.6	14825.5	17955	20040.9	20496.5	23052	23456.9	22761.5	30169	32890	33507.9	35241.9	36602.7	37799.2	41300.1	46022.3	51795.5	56315.6	67865.7	75797.9	87217.7	100551
South Dakota	NA	NA	NA	NA	NA	NA	NA	NA	NA	NA	4162.13	6923.62	8586.59	9360.99	10041.3	9318.28	9599.12	10156.9	9932.94	10466.2	10545.5	11437	12336.1
Tennessee	NA	6211.88	6887.55	8808.6	10998.5	11516.8	12692.6	13211.9	14806.1	16408.1	18411.6	21048.1	22758.2	24609.3	27542.7	30693.1	34649.7	37548.3	41302	48327.6	51338.8	59887.2	66801.1
Texas	NA	NA	NA	NA	NA	NA	2725.54	4542.97	5805.52	7074.44	9124.58	12546.1	15904.3	18431.7	22931.9	25255.2	30359	37715.3	44081.6	56020.4	66876	82093.8	98998.3
Utah	NA	NA	NA	NA	NA	NA	NA	NA	NA	NA	NA	10250	13827.8	15496.4	17512	18976.2	23753.9	30711.3	36526.7	50380.6	59408.6	77005.8	95306.4
Utah Territory	NA	NA	NA	NA	NA	NA	1625.71	2356.5	4316.8	6259.26	8316.2	NA	NA	NA	NA	NA	NA	NA	NA	NA	NA	NA	NA
Vermont	12191.6	14042.3	18157.9	18135.7	21588.6	20853.4	22437.1	22507	23610.8	23734.7	23744.4	24545.8	25425.4	25173.4	25686.5	25659.4	26981.9	27848.6	31737.9	36532.6	40197	43487.6	44695.8
Virginia	18455.9	9464	9844.44	10050.7	11216.7	10418.5	10377.1	10785.9	12375.4	15278.4	16395.8	15713.4	17620.6	19243.2	19531.1	21594.9	25927.2	30515	34690.3	39314.8	45495.3	52433.4	59709.1
Washington	NA	NA	NA	NA	NA	NA	NA	NA	NA	NA	10276.2	14391.8	30052.4	34785.2	40087.1	44517.7	60999.1	73159.3	87414.6	105953	124787	151131	172424
Washington Territory	NA	NA	NA	NA	NA	NA	NA	610.211	1088.86	3004.64	NA	NA	NA	NA	NA	NA	NA	NA	NA	NA	NA	NA	NA
West Virginia	NA	NA	NA	NA	NA	NA	NA	NA	8339.89	11452.9	14125.8	17432.7	22202.2	26612.7	31440.1	34581.3	36464.6	33825.8	31713.4	35448.1	32608.7	32879	33690.8
Wisconsin	NA	NA	NA	NA	NA	NA	9851.32	13377.3	18184	20880.9	24807.1	29557.7	32871.3	37071.4	41394.5	44191.4	48374.3	55658.8	61357.4	65357.9	67941.2	74495.5	78985.9
Wisconsin Territory	NA	NA	NA	NA	NA	1406.59	NA	NA	NA	NA	NA	NA	NA	NA	NA	NA	NA	NA	NA	NA	NA	NA	NA
Wyoming	NA	NA	NA	NA	NA	NA	NA	NA	NA	NA	5058.75	6609.36	9731	8836.45	9398.54	10447.6	12105.4	13752.8	14452.9	20415.5	19721.2	21468.8	24505.5
Wyoming Territory	NA	NA	NA	NA	NA	NA	NA	NA	1823.6	2969.86	NA	NA	NA	NA	NA	NA	NA	NA	NA	NA	NA	NA	NA

## Sheet: v_c
STATE	1790	1800	1810	1820	1830	1840	1850	1860	1870	1880	1890	1900	1910	1920	1930	1940	1950	1960	1970	1980	1990	2000	2010
Alabama	NA	NA	NA	1.14225e+07	2.72899e+07	4.32761e+07	6.15803e+07	7.13476e+07	8.80948e+07	1.06798e+08	1.65159e+08	3.24747e+08	7.33441e+08	1.36712e+09	2.68776e+09	3141385113	5.11512e+09	7.23384e+09	7.69384e+09	8.78202e+09	8.89983e+09	9.76113e+09	1.07592e+10
Alaska	NA	NA	NA	NA	NA	NA	NA	NA	NA	NA	NA	NA	NA	NA	NA	NA	NA	3.12708e+08	5.52676e+08	1.2948e+09	2.09841e+09	2.62714e+09	3.23542e+09
Alaska Territory	NA	NA	NA	NA	NA	NA	NA	NA	NA	91098002	158135328	3011058	NA	1.27166e+07	15330383	3.17362e+07	3.90657e+08	NA	NA	NA	NA	NA	NA
Arizona	NA	NA	NA	NA	NA	NA	NA	NA	NA	NA	NA	NA	NA	4.75989e+08	1.37627e+09	2.13886e+09	7.49465e+09	3.11482e+10	6.59241e+10	1.59911e+11	2.94993e+11	6.10895e+11	9.37896e+11
Arizona Territory	NA	NA	NA	NA	NA	NA	NA	NA	5.53375e+06	2.69999e+07	1.45843e+07	2.71376e+07	1.06435e+08	NA	NA	NA	NA	NA	NA	NA	NA	NA	NA
Arkansas	NA	NA	NA	NA	NA	1.72565e+06	5.03532e+06	1.06705e+07	2.27686e+07	2.71887e+07	5.72236e+07	7.125e+07	1.29363e+08	2.03539e+08	3.34791e+08	4.20912e+08	6.45219e+08	9.12657e+08	1.24509e+09	1.75831e+09	1.92933e+09	2.39812e+09	3.20978e+09
Arkansas Territory	NA	NA	NA	2690132	567211	NA	NA	NA	NA	NA	NA	NA	NA	NA	NA	NA	NA	NA	NA	NA	NA	NA	NA
California	NA	NA	NA	NA	NA	NA	2.85455e+07	8.43773e+07	4.40243e+08	1.05434e+09	1.82799e+09	2.59548e+09	7.68065e+09	2.01121e+10	9.0642e+10	1.39571e+11	3.07774e+11	6.50857e+11	9.10124e+11	1.06985e+12	1.54132e+12	1.82652e+12	2.0077e+12
Colorado	NA	NA	NA	NA	NA	NA	NA	NA	NA	5.54159e+07	3.20057e+08	4.34673e+08	8.04708e+08	1.10121e+09	1.39913e+09	1.73352e+09	2.92555e+09	4.74953e+09	6.67046e+09	9.58712e+09	1.22356e+10	1.92125e+10	2.46577e+10
Colorado Territory	NA	NA	NA	NA	NA	NA	NA	NA	2.98431e+06	NA	NA	NA	NA	NA	NA	NA	NA	NA	NA	NA	NA	NA	NA
Connecticut	8.50643e+07	1.00886e+08	1.18477e+08	1.23689e+08	1.41248e+08	1.82777e+08	346859514	8.20434e+08	1.37612e+09	2305028744	4.46412e+09	8.12611e+09	1.42262e+10	2.46571e+10	3.51764e+10	3.96655e+10	5.44177e+10	8.59207e+10	1.15214e+11	1.13748e+11	1.21364e+11	1.28258e+11	1.37557e+11
Dakota Territory	NA	NA	NA	NA	NA	NA	NA	NA	1.23087e+06	6.22568e+06	NA	NA	NA	NA	NA	NA	NA	NA	NA	NA	NA	NA	NA
Delaware	614741	1.16326e+07	1.31901e+07	1.26516e+07	2.58053e+07	4.45335e+07	1.15336e+08	2.27672e+08	3.58743e+08	6.26569e+08	1.27079e+09	1.75918e+09	2.37769e+09	4.13686e+09	5037183277	6255091327	9.68912e+09	18899210827	3.09545e+10	3.00007e+10	36264958999	43088171539	4.32042e+10
District Of Columbia	NA	NA	8.94436e+06	NA	4.67429e+07	7.51104e+07	395288517	NA	NA	NA	NA	NA	NA	NA	NA	NA	NA	NA	NA	NA	NA	NA	NA
Florida	NA	NA	NA	NA	NA	NA	7.62116e+06	9.95899e+06	1.91373e+07	2.84771e+07	4.30151e+07	7.94433e+07	2.32486e+08	3.7628e+08	1.00523e+09	2.2078e+09	6.0957e+09	2.12522e+10	3.9818e+10	7.15654e+10	1.0858e+11	1.57229e+11	1.98698e+11
Florida Territory	NA	NA	NA	NA	3.02249e+06	6.61939e+06	NA	NA	NA	NA	NA	NA	NA	NA	NA	NA	NA	NA	NA	NA	NA	NA	NA
Georgia	7.92284e+07	1.57826e+07	1.74871e+07	2.38863e+07	1.77179e+07	1.44402e+07	1.92493e+07	2.1709e+07	3.36482e+07	5.23408e+07	9.84873e+07	1.62929e+08	2.86014e+08	4.5196e+08	7.57612e+08	1.13864e+09	1.79413e+09	2.86053e+09	4.10788e+09	4.86428e+09	6.99963e+09	1.1866e+10	1.61529e+10
Hawaii	NA	NA	NA	NA	NA	NA	NA	NA	NA	NA	NA	NA	NA	NA	NA	NA	NA	4.41743e+10	8.50784e+10	1.026e+11	1.20205e+11	1.29004e+11	1.50312e+11
Hawaii Territory	NA	NA	NA	NA	NA	NA	NA	NA	NA	NA	NA	5.47867e+08	9.72509e+08	2.15919e+09	5.69355e+09	10560050337	23364911559	NA	NA	NA	NA	NA	NA
Idaho	NA	NA	NA	NA	NA	NA	NA	NA	NA	NA	9.69115e+06	1.63621e+07	6.35288e+07	6.33088e+07	7.92438e+07	1.24246e+08	2.10044e+08	3.2878e+08	4.32608e+08	9.24677e+08	1.23695e+09	2.55698e+09	4.44041e+09
Idaho Territory	NA	NA	NA	NA	NA	NA	NA	NA	1.0953e+06	3.50323e+06	NA	NA	NA	NA	NA	NA	NA	NA	NA	NA	NA	NA	NA
Illinois	NA	NA	NA	8.44626e+06	7.48995e+06	1.42054e+07	3.89708e+07	2.42324e+08	1.19332e+09	3.5099e+09	1.35566e+10	3.24288e+10	5.57325e+10	9.00844e+10	1.53785e+11	1.60136e+11	1.97662e+11	2.57164e+11	2.96497e+11	2.73629e+11	2.6119e+11	2.93167e+11	2.78038e+11
Illinois Territory	NA	NA	2571912	NA	NA	NA	NA	NA	NA	NA	NA	NA	NA	NA	NA	NA	NA	NA	NA	NA	NA	NA	NA
Indian Territory	NA	NA	NA	NA	NA	NA	NA	NA	NA	NA	NA	2.59749e+09	NA	NA	NA	NA	NA	NA	NA	NA	NA	NA	NA
Indiana	NA	NA	NA	1.00147e+07	1.29235e+07	2.33482e+07	2.51638e+07	3.81563e+07	8.11378e+07	1.42199e+08	2.54671e+08	5.04168e+08	9.18157e+08	1.7074e+09	2.95083e+09	3.52539e+09	5.27376e+09	8.77144e+09	1.08988e+10	1.02603e+10	1.0418e+10	1.20558e+10	1.36302e+10
Indiana Territory	NA	586153	3.77482e+06	NA	NA	NA	NA	NA	NA	NA	NA	NA	NA	NA	NA	NA	NA	NA	NA	NA	NA	NA	NA
Iowa	NA	NA	NA	NA	NA	NA	1.68257e+07	5.17574e+07	9.17074e+07	8.61783e+07	1.08845e+08	1.34919e+08	2.11469e+08	3.69064e+08	4.76771e+08	5.85782e+08	8.03003e+08	1.16715e+09	1.45297e+09	1.63364e+09	1.73988e+09	2.19868e+09	2.79722e+09
Iowa Territory	NA	NA	NA	NA	NA	3.43697e+06	NA	NA	NA	NA	NA	NA	NA	NA	NA	NA	NA	NA	NA	NA	NA	NA	NA
Kansas	NA	NA	NA	NA	NA	NA	NA	NA	3.56455e+07	5.90965e+07	1.15496e+08	1.51899e+08	2.24343e+08	3.10134e+08	4.41683e+08	4.80908e+08	8.30758e+08	1.74054e+09	2.07889e+09	2.38493e+09	3.13805e+09	4.26893e+09	5.57264e+09
Kansas Territory	NA	NA	NA	NA	NA	NA	NA	3.16175e+07	NA	NA	NA	NA	NA	NA	NA	NA	NA	NA	NA	NA	NA	NA	NA
Kentucky	NA	1.27384e+07	2.21097e+07	2.51063e+07	2.724e+07	2.66573e+07	4.31272e+07	7.80821e+07	1.324e+08	1.9737e+08	3.18389e+08	4.76523e+08	6.12135e+08	7.23854e+08	1.16231e+09	1.36484e+09	2.12617e+09	3.32528e+09	4.33013e+09	4.33405e+09	4.19909e+09	4.68923e+09	5.49418e+09
Louisiana	NA	NA	NA	6.27545e+07	6.8708e+07	2.51497e+08	2.82874e+08	5.79222e+08	6.45141e+08	7.55432e+08	9.16513e+08	1.31731e+09	1.83692e+09	2.24981e+09	3.26705e+09	3.87742e+09	5.52092e+09	7.63297e+09	8.34141e+09	9.99418e+09	9.29126e+09	9.86573e+09	8.91041e+09
Louisiana Territory	NA	NA	4.00154e+06	NA	NA	NA	NA	NA	NA	NA	NA	NA	NA	NA	NA	NA	NA	NA	NA	NA	NA	NA	NA
Maine	NA	NA	NA	2.3582e+08	2.00535e+08	3.46883e+08	4.8447e+08	3.36706e+08	3.77813e+08	3.85282e+08	4.57762e+08	5.80059e+08	7.82676e+08	9.72258e+08	1.20567e+09	1.4517e+09	1.91672e+09	2.38262e+09	2.56228e+09	3.19731e+09	3.99114e+09	4.70888e+09	5.34525e+09
Maryland	3.56685e+07	5.1242e+07	8.93277e+07	1.63264e+08	2.80276e+08	7.30005e+08	1.88585e+09	1.7506e+09	4.43096e+09	4.13643e+09	7.12788e+09	9.87424e+09	1.2081e+10	2.08898e+10	2.53494e+10	2.90532e+10	3.72024e+10	4.57415e+10	6.19486e+10	5.75244e+10	6.59955e+10	7.44724e+10	8.46398e+10
Massachusetts	7.17883e+09	8.45105e+09	1.03994e+10	4.50955e+08	6.52201e+08	1.11859e+09	2.64729e+09	4.90688e+09	8.59423e+09	1.4615e+10	2.45586e+10	4.0383e+10	5.79431e+10	7.66156e+10	9.47677e+10	9.69374e+10	1.10642e+11	1.25775e+11	1.48521e+11	1.36929e+11	1.44467e+11	1.59064e+11	1.70232e+11
Michigan	NA	NA	NA	NA	NA	4.8006e+07	9.17087e+07	1.89623e+08	3.51714e+08	5.38615e+08	1.01241e+09	1.67109e+09	3.62271e+09	1.67444e+10	4.33822e+10	4.94981e+10	7.31801e+10	9.27534e+10	9.97813e+10	8.37129e+10	7.43448e+10	7.65904e+10	6.74935e+10
Michigan Territory	NA	NA	600198	1.25915e+06	3.4659e+06	NA	NA	NA	NA	NA	NA	NA	NA	NA	NA	NA	NA	NA	NA	NA	NA	NA	NA
Minnesota	NA	NA	NA	NA	NA	NA	NA	1.26455e+07	5.48165e+07	1.1485e+08	6.49988e+08	9.42572e+08	1.94777e+09	2.85866e+09	4.10672e+09	4.84773e+09	6.6509e+09	1.01687e+10	1.3247e+10	1.299e+10	1.58072e+10	1.902e+10	2.07089e+10
Minnesota Territory	NA	NA	NA	NA	NA	NA	486512	NA	NA	NA	NA	NA	NA	NA	NA	NA	NA	NA	NA	NA	NA	NA	NA
Mississippi	NA	NA	NA	9.05837e+06	1.25452e+07	2.42568e+07	4.64252e+07	5.07313e+07	5.43581e+07	6.77402e+07	6.81389e+07	9.01639e+07	1.17846e+08	1.1536e+08	2.07665e+08	2.57534e+08	3.9476e+08	6.50526e+08	8.4083e+08	1.18872e+09	1.26567e+09	1.48521e+09	1.70881e+09
Mississippi Territory	NA	2907100	6.54103e+06	NA	NA	NA	NA	NA	NA	NA	NA	NA	NA	NA	NA	NA	NA	NA	NA	NA	NA	NA	NA
Missouri	NA	NA	NA	NA	8.07033e+06	2.26828e+07	1.12681e+08	3.14588e+08	1.0632e+09	1.06977e+09	1.88795e+09	3.11142e+09	4.62115e+09	6.14187e+09	7.78655e+09	7.99759e+09	9.87501e+09	1.2007e+10	1.44753e+10	1.32819e+10	1.3592e+10	1.44155e+10	1.49129e+10
Missouri Territory	NA	NA	NA	1.17555e+07	NA	NA	NA	NA	NA	NA	NA	NA	NA	NA	NA	NA	NA	NA	NA	NA	NA	NA	NA
Montana	NA	NA	NA	NA	NA	NA	NA	NA	NA	NA	4.09032e+07	9.45418e+07	1.21507e+08	1.08225e+08	9.2423e+07	1.07122e+08	1.49572e+08	2.47519e+08	3.18897e+08	4.41323e+08	4.84855e+08	6.76449e+08	9.07042e+08
Montana Territory	NA	NA	NA	NA	NA	NA	NA	NA	2.72188e+06	5.35735e+06	NA	NA	NA	NA	NA	NA	NA	NA	NA	NA	NA	NA	NA
Nebraska	NA	NA	NA	NA	NA	NA	NA	NA	1.30649e+07	4.02487e+07	3.34477e+08	2.63441e+08	3.52495e+08	5.01725e+08	6.57148e+08	7.33619e+08	9.6458e+08	1.47679e+09	1.90575e+09	2.09661e+09	2.38052e+09	3.03776e+09	3.88583e+09
Nebraska Territory	NA	NA	NA	NA	NA	NA	NA	1.57537e+06	NA	NA	NA	NA	NA	NA	NA	NA	NA	NA	NA	NA	NA	NA	NA
Nevada	NA	NA	NA	NA	NA	NA	NA	NA	8.70561e+06	1.48119e+07	5.64994e+06	4.91136e+06	1.74471e+07	1.84799e+07	4.18166e+07	6.3438e+07	2.33494e+08	1.1916e+09	4.76248e+09	1.35405e+10	3.34118e+10	1.11431e+11	2.23091e+11
New Hampshire	1.21171e+08	8.35805e+07	3.02731e+08	3.62167e+08	2.38931e+08	2.61164e+08	2.26735e+08	2.53872e+08	2.61987e+08	3.50555e+08	5.27097e+08	7.96143e+08	1.01724e+09	1.18591e+09	1.25757e+09	1.33728e+09	1.61151e+09	2.26696e+09	3.98132e+09	6.47695e+09	1.02796e+10	1.33721e+10	1.48697e+10
New Jersey	2.48144e+07	3.35397e+07	4.31413e+07	6.65639e+07	8.42788e+07	9.33545e+07	2.10555e+08	3.98701e+08	1.12898e+09	2.29642e+09	4.90106e+09	1.00905e+10	2.07443e+10	3.16264e+10	4.67775e+10	4.58217e+10	5.27827e+10	6.2415e+10	6.94223e+10	5.69726e+10	5.32201e+10	6.03612e+10	6.37016e+10
New Mexico	NA	NA	NA	NA	NA	NA	NA	NA	NA	NA	NA	NA	NA	4.02506e+07	7.65335e+07	1.57491e+08	6.45883e+08	2.13726e+09	3.03919e+09	5.44121e+09	7.08041e+09	9.72745e+09	1.39413e+10
New Mexico Territory	NA	NA	NA	NA	NA	NA	9.25921e+06	1.18017e+07	1.94489e+07	2.88666e+07	3.52326e+07	4.47914e+07	2.21495e+07	NA	NA	NA	NA	NA	NA	NA	NA	NA	NA
New York	3.81177e+08	1.84046e+08	3.0425e+08	4.63514e+08	7.42797e+08	1.60534e+09	4.3787e+09	1.12882e+10	1.63622e+10	2.8026e+10	4.71605e+10	8.70938e+10	1.62459e+11	1.52507e+11	1.93724e+11	2.19059e+11	2.43065e+11	2.55553e+11	2.73991e+11	2.24869e+11	2.34521e+11	2.7389e+11	2.83403e+11
North Carolina	7.67728e+06	1.19157e+07	1.64559e+07	2.2402e+07	2.34639e+07	2.46477e+07	1.97623e+07	2.26784e+07	3.5365e+07	5.7931e+07	6.8151e+07	1.01194e+08	1.63608e+08	2.72674e+08	6.15611e+08	8.35238e+08	1.29404e+09	2.17955e+09	3.40754e+09	4.5418e+09	6.73337e+09	1.16838e+10	2.00911e+10
North Dakota	NA	NA	NA	NA	NA	NA	NA	NA	NA	NA	2.22058e+07	3.91684e+07	4.35963e+07	5.07937e+07	6.76198e+07	7.87431e+07	1.01141e+08	1.53776e+08	2.19171e+08	2.95202e+08	3.6473e+08	4.59413e+08	6.28632e+08
Northwest Territory	NA	2.0806e+07	NA	NA	NA	NA	NA	NA	NA	NA	NA	NA	NA	NA	NA	NA	NA	NA	NA	NA	NA	NA	NA
Ohio	NA	NA	1.88919e+07	3.80833e+07	9.54768e+07	1.42038e+08	3.1003e+08	5.2879e+08	8.43772e+08	1.36749e+09	2.48273e+09	3.99905e+09	7.20415e+09	1.42761e+10	2.30474e+10	2.409e+10	3.28642e+10	4.82489e+10	5.58257e+10	4.68425e+10	4.54863e+10	4.68867e+10	4.50703e+10
Oklahoma	NA	NA	NA	NA	NA	NA	NA	NA	NA	NA	NA	NA	1.3354e+08	3.46562e+08	1.06057e+09	1.16683e+09	2.03578e+09	3.84596e+09	5.44511e+09	6.82281e+09	7.80035e+09	9.66815e+09	1.15274e+10
Oklahoma Territory	NA	NA	NA	NA	NA	NA	NA	NA	NA	NA	1.07147e+07	8.32862e+07	NA	NA	NA	NA	NA	NA	NA	NA	NA	NA	NA
Oregon	NA	NA	NA	NA	NA	NA	NA	4.24644e+06	9.35009e+06	2.76e+07	1.71891e+08	3.0803e+08	1.41761e+09	2.01516e+09	3.06052e+09	3.41948e+09	6.23642e+09	7.97128e+09	9.97564e+09	1.22932e+10	1.43381e+10	2.0637e+10	2.64199e+10
Oregon Territory	NA	NA	NA	NA	NA	NA	705842	NA	NA	NA	NA	NA	NA	NA	NA	NA	NA	NA	NA	NA	NA	NA	NA
Orleans Territory	NA	NA	2.62508e+07	NA	NA	NA	NA	NA	NA	NA	NA	NA	NA	NA	NA	NA	NA	NA	NA	NA	NA	NA	NA
Pennsylvania	1.4298e+08	2.51347e+08	4.06811e+08	4.71846e+08	7.67572e+08	1.28794e+09	2.7997e+09	5.14542e+09	7.60844e+09	1.17783e+10	1.96297e+10	3.20837e+10	4.92172e+10	6.80986e+10	8.26909e+10	8.30159e+10	9.54031e+10	9.94025e+10	9.83519e+10	7.93599e+10	7.23569e+10	7.04599e+10	7.20058e+10
Puerto Rico	NA	NA	NA	NA	NA	NA	NA	NA	NA	NA	NA	NA	NA	NA	NA	NA	NA	NA	NA	NA	NA	NA	2.9289e+09
Rhode Island	6.73075e+07	7.0012e+07	9.37111e+07	1.32124e+08	2.56321e+08	4.26673e+08	1069163260	1682652505	3.5124e+09	6.37616e+09	1.08584e+10	1.85045e+10	3.12482e+10	3.93016e+10	5.07385e+10	5.20861e+10	5.45525e+10	5.00052e+10	4.8939e+10	4.70801e+10	5.05514e+10	5.49103e+10	5.60555e+10
South Carolina	1.90529e+08	1.13984e+08	1.28876e+08	1.96444e+08	2.16809e+08	1.94635e+08	1.65543e+08	1.48296e+08	2.15569e+08	248981430	1.49222e+08	2.14547e+08	2.68444e+08	4.61063e+08	6.5005e+08	8.99707e+08	1.51469e+09	2.51946e+09	3.41905e+09	4.78959e+09	5.96036e+09	7.93094e+09	1.16861e+10
South Dakota	NA	NA	NA	NA	NA	NA	NA	NA	NA	NA	1.88377e+07	2.06521e+07	3.43876e+07	4.36284e+07	5.49449e+07	6.52828e+07	9.72599e+07	1.59512e+08	1.88786e+08	2.53773e+08	3.27103e+08	4.45598e+08	5.95342e+08
Tennessee	NA	8.20483e+06	1.14421e+07	3.6569e+07	5.04454e+07	4.27788e+07	6.00562e+07	7.32818e+07	1.35498e+08	1.61518e+08	2.81697e+08	4.25449e+08	6.63756e+08	9.1942e+08	1.75691e+09	2.37261e+09	4.06148e+09	6.49745e+09	8.39447e+09	9.87508e+09	1.11336e+10	1.35633e+10	1.57955e+10
Texas	NA	NA	NA	NA	NA	NA	4.1092e+06	1.34419e+07	2.42794e+07	6.54222e+07	1.22874e+08	2.24091e+08	3.63686e+08	7.35918e+08	1.5979e+09	2.58152e+09	5.97959e+09	1.34394e+10	2.44224e+10	4.07185e+10	5.85653e+10	8.67549e+10	1.24533e+11
Utah	NA	NA	NA	NA	NA	NA	NA	NA	NA	NA	NA	2.38198e+08	6.39455e+08	8.77224e+08	1.30891e+09	1.56852e+09	2.75691e+09	5.39061e+09	7.88509e+09	1.45659e+10	2.02418e+10	3.18523e+10	4.48805e+10
Utah Territory	NA	NA	NA	NA	NA	NA	4.4152e+06	9.48422e+06	2.02291e+07	5.12729e+07	1.47908e+08	NA	NA	NA	NA	NA	NA	NA	NA	NA	NA	NA	NA
Vermont	1.88716e+07	7.38946e+07	1.03591e+08	1.071e+08	1.0547e+08	1.03363e+08	1.06303e+08	9.5857e+07	1.13251e+08	1.04423e+08	1.15163e+08	1.32954e+08	1.70466e+08	1.70091e+08	2.00734e+08	2.10881e+08	2.7052e+08	3.57093e+08	5.91232e+08	7.72495e+08	9.79666e+08	1.18234e+09	1.3331e+09
Virginia	6.17658e+09	2.4939e+07	2.3578e+07	2.85015e+07	3.50812e+07	3.58895e+07	4.44517e+07	5.9492e+07	8.50371e+07	1.38456e+08	1.96592e+08	1.25463e+08	2.19795e+08	4.0163e+08	4.57179e+08	5.47654e+08	1.06346e+09	2.02661e+09	3.34327e+09	4.46392e+09	7.64879e+09	1.03991e+10	1.35948e+10
Washington	NA	NA	NA	NA	NA	NA	NA	NA	NA	NA	1.9534e+08	4.32453e+08	2.64332e+09	4.42549e+09	6.147e+09	7.34075e+09	1.54918e+10	2.49163e+10	3.82245e+10	4.7524e+10	6.80118e+10	9.31249e+10	1.17273e+11
Washington Territory	NA	NA	NA	NA	NA	NA	NA	357471	1.42498e+06	5.49846e+06	NA	NA	NA	NA	NA	NA	NA	NA	NA	NA	NA	NA	NA
West Virginia	NA	NA	NA	NA	NA	NA	NA	NA	2.96132e+07	4.77235e+07	6.12893e+07	9.49804e+07	2.14888e+08	4.45883e+08	8.04241e+08	1.08748e+09	1.50652e+09	1.48425e+09	1.26114e+09	1.3239e+09	1.07014e+09	1.05277e+09	1.09996e+09
Wisconsin	NA	NA	NA	NA	NA	NA	6.22577e+07	1.74495e+08	2.55399e+08	3.79702e+08	8.36712e+08	1.53104e+09	2.56737e+09	3.98733e+09	7.25973e+09	8.15701e+09	1.0705e+10	1.55612e+10	1.68186e+10	1.49394e+10	1.54079e+10	1.61433e+10	1.74765e+10
Wisconsin Territory	NA	NA	NA	NA	NA	2.5248e+06	NA	NA	NA	NA	NA	NA	NA	NA	NA	NA	NA	NA	NA	NA	NA	NA	NA
Wyoming	NA	NA	NA	NA	NA	NA	NA	NA	NA	NA	2.01857e+07	3.02713e+07	4.26004e+07	2.45946e+07	4.44919e+07	5.94188e+07	1.15432e+08	2.03865e+08	2.02955e+08	3.57867e+08	3.31544e+08	3.93923e+08	5.16136e+08
Wyoming Territory	NA	NA	NA	NA	NA	NA	NA	NA	618980	4.64415e+06	NA	NA	NA	NA	NA	NA	NA	NA	NA	NA	NA	NA	NA

## Sheet: s_c
STATE	1790	1800	1810	1820	1830	1840	1850	1860	1870	1880	1890	1900	1910	1920	1930	1940	1950	1960	1970	1980	1990	2000	2010
Alabama	NA	NA	NA	1.80841	1.38161	0.786841	0.399048	0.48359	1.48019	1.13496	2.4763	4.09893	5.81809	6.37217	6.65985	6.41965	5.92858	5.49646	5.22702	4.88907	4.48173	4.1186	3.62755
Alaska	NA	NA	NA	NA	NA	NA	NA	NA	NA	NA	NA	NA	NA	NA	NA	NA	NA	3.45947	4.26492	3.87544	3.8208	3.92387	3.87501
Alaska Territory	NA	NA	NA	NA	NA	NA	NA	NA	NA	0	0	0	NA	0.0478453	-0.0765641	0.232531	0.623219	NA	NA	NA	NA	NA	NA
Arizona	NA	NA	NA	NA	NA	NA	NA	NA	NA	NA	NA	NA	NA	2.1516	2.62861	2.72557	2.67788	2.72006	2.8144	2.8422	3.05226	3.13453	3.14988
Arizona Territory	NA	NA	NA	NA	NA	NA	NA	NA	0.718329	1.64435	0.528479	0.831927	0.80858	NA	NA	NA	NA	NA	NA	NA	NA	NA	NA
Arkansas	NA	NA	NA	NA	NA	1.4428	1.13862	0.506823	2.36825	1.48787	1.86843	2.61254	3.12363	3.40541	3.58392	3.85242	4.45758	5.36763	5.68989	5.66162	5.37921	4.48498	3.91468
Arkansas Territory	NA	NA	NA	1.71592	0.480943	NA	NA	NA	NA	NA	NA	NA	NA	NA	NA	NA	NA	NA	NA	NA	NA	NA	NA
California	NA	NA	NA	NA	NA	NA	1.86958	3.50141	5.89906	5.9842	5.34404	4.8699	4.20986	4.8692	6.2192	6.49113	6.51166	6.48265	6.14101	5.74983	5.51382	5.27584	4.99875
Colorado	NA	NA	NA	NA	NA	NA	NA	NA	NA	3.1092	6.26504	5.93234	6.06015	6.3318	6.27848	6.41116	6.37226	5.2445	3.94677	2.89921	2.67853	2.5178	2.42097
Colorado Territory	NA	NA	NA	NA	NA	NA	NA	NA	1.57361	NA	NA	NA	NA	NA	NA	NA	NA	NA	NA	NA	NA	NA	NA
Connecticut	-0.80035	-0.596901	-0.665404	-0.740245	-0.457791	-0.339297	-0.13687	0.153726	0.303249	0.479797	0.635044	0.655678	0.616665	0.550836	0.4952	0.485099	0.475955	0.473285	0.479105	0.474714	0.472806	0.478951	0.479099
Dakota Territory	NA	NA	NA	NA	NA	NA	NA	NA	1.1061	2.29173	NA	NA	NA	NA	NA	NA	NA	NA	NA	NA	NA	NA	NA
Delaware	0.0249884	0.704481	-0.103033	0.0992188	-0.503737	0.252431	0.64056	0.695665	0.699177	0.694578	0.684765	0.666396	0.644903	0.676131	0.677727	0.665848	0.662166	0.704712	0.707046	0.707106	0.706997	0.690592	0.684829
District Of Columbia	NA	NA	-0.0409681	NA	0.757101	1.09999	0.656211	NA	NA	NA	NA	NA	NA	NA	NA	NA	NA	NA	NA	NA	NA	NA	NA
Florida	NA	NA	NA	NA	NA	NA	1.40087	1.14971	1.33313	0.967636	0.94809	1.54384	2.79877	3.25601	3.15511	3.48241	3.9341	3.82483	3.73915	3.47511	3.17067	3.05337	2.87982
Florida Territory	NA	NA	NA	NA	1.13429	1.62716	NA	NA	NA	NA	NA	NA	NA	NA	NA	NA	NA	NA	NA	NA	NA	NA	NA
Georgia	1.89449	0.299972	0.272374	0.439598	0.384914	0.523001	0.344022	1.27268	2.18284	2.22975	3.82076	4.57087	6.33686	7.16156	8.52484	8.90575	8.21262	7.17591	6.43639	5.52343	5.0458	5.01761	4.85427
Hawaii	NA	NA	NA	NA	NA	NA	NA	NA	NA	NA	NA	NA	NA	NA	NA	NA	NA	1.45761	1.147	1.45584	1.43183	1.39911	1.36707
Hawaii Territory	NA	NA	NA	NA	NA	NA	NA	NA	NA	NA	NA	0.269462	0.288192	0.666928	1.01394	1.07813	1.11836	NA	NA	NA	NA	NA	NA
Idaho	NA	NA	NA	NA	NA	NA	NA	NA	NA	NA	1.50215	-0.0151267	0.286018	1.45596	1.51449	1.75938	2.22572	2.46607	2.76193	3.25666	3.58575	3.92495	3.97648
Idaho Territory	NA	NA	NA	NA	NA	NA	NA	NA	0.99337	1.03287	NA	NA	NA	NA	NA	NA	NA	NA	NA	NA	NA	NA	NA
Illinois	NA	NA	NA	2.72512	1.91421	1.30282	2.38223	5.70649	8.3051	9.20738	9.69505	9.79353	9.81153	9.82916	9.83999	9.83059	9.79737	9.71406	9.61761	9.46029	9.30361	9.13575	8.89612
Illinois Territory	NA	NA	0	NA	NA	NA	NA	NA	NA	NA	NA	NA	NA	NA	NA	NA	NA	NA	NA	NA	NA	NA	NA
Indian Territory	NA	NA	NA	NA	NA	NA	NA	NA	NA	NA	NA	1.14477	NA	NA	NA	NA	NA	NA	NA	NA	NA	NA	NA
Indiana	NA	NA	NA	1.11996	1.07995	0.545618	0.472066	0.744175	2.53242	3.76758	4.7009	5.09813	5.43829	5.48584	5.06789	5.12644	5.04084	5.1502	5.18579	4.99225	5.11597	5.03116	4.82238
Indiana Territory	NA	0.905299	-0.460039	NA	NA	NA	NA	NA	NA	NA	NA	NA	NA	NA	NA	NA	NA	NA	NA	NA	NA	NA	NA
Iowa	NA	NA	NA	NA	NA	NA	1.4507	1.16693	0.784046	0.833787	2.05122	2.48466	3.21516	4.10628	4.14224	4.41695	4.42023	4.42017	4.24694	4.28227	4.68303	4.93245	5.19144
Iowa Territory	NA	NA	NA	NA	NA	1.03826	NA	NA	NA	NA	NA	NA	NA	NA	NA	NA	NA	NA	NA	NA	NA	NA	NA
Kansas	NA	NA	NA	NA	NA	NA	NA	NA	1.78676	0.44062	1.20646	1.68528	2.71797	3.30652	4.0607	4.1821	5.02802	5.53267	5.11255	5.10959	5.30845	5.55698	5.77374
Kansas Territory	NA	NA	NA	NA	NA	NA	NA	4.1986	NA	NA	NA	NA	NA	NA	NA	NA	NA	NA	NA	NA	NA	NA	NA
Kentucky	NA	0.660013	0.785073	0.916986	1.10657	2.11903	4.59103	6.6624	7.28824	7.29727	7.8833	8.20043	8.25129	8.2902	8.05665	8.05631	8.49503	8.94402	8.97259	8.49152	8.19235	7.91345	7.68297
Louisiana	NA	NA	NA	3.73343	4.65644	5.49029	5.88572	6.27028	6.63551	6.80027	6.85264	6.65931	6.56572	6.95708	6.67591	6.43957	5.90924	4.9513	4.04741	3.36585	3.07994	2.87663	2.47384
Louisiana Territory	NA	NA	-0.155647	NA	NA	NA	NA	NA	NA	NA	NA	NA	NA	NA	NA	NA	NA	NA	NA	NA	NA	NA	NA
Maine	NA	NA	NA	-0.0681045	0.19841	0.034993	0.0416522	0.758454	0.943978	0.832334	0.809759	0.848563	0.873833	0.996625	0.972479	0.978335	1.12557	1.11351	1.18943	1.21961	1.34984	1.52136	1.54086
Maryland	0.610236	0.676635	1.34478	2.08099	2.36807	3.69725	3.91593	3.93474	4.23482	4.20457	4.3947	4.3742	4.28485	4.47665	4.38583	4.28946	3.82935	2.65482	1.84878	1.5804	1.45553	1.43214	1.45314
Massachusetts	3.39216	3.39732	3.28514	0.348487	0.25031	0.328362	0.499395	0.571963	0.809737	0.944431	0.933434	0.94627	0.89678	0.891944	0.946447	0.955169	0.947014	1.02664	1.11653	1.09509	1.02842	1.01146	0.976205
Michigan	NA	NA	NA	NA	NA	1.47204	1.47956	1.87562	2.46676	3.35462	4.9542	6.04052	7.04582	8.25681	8.34145	8.30346	8.15493	7.50356	6.79774	6.08318	5.56837	5.18193	4.68241
Michigan Territory	NA	NA	0.578393	1.39015	1.34547	NA	NA	NA	NA	NA	NA	NA	NA	NA	NA	NA	NA	NA	NA	NA	NA	NA	NA
Minnesota	NA	NA	NA	NA	NA	NA	NA	1.46651	1.39149	2.60142	5.15547	5.2713	5.52515	5.72841	6.15898	6.27731	6.52612	6.63397	6.57209	6.2942	6.18077	5.91679	5.69958
Minnesota Territory	NA	NA	NA	NA	NA	NA	1.29771	NA	NA	NA	NA	NA	NA	NA	NA	NA	NA	NA	NA	NA	NA	NA	NA
Mississippi	NA	NA	NA	1.21547	1.01895	0.971821	0.605748	0.401304	0.853892	0.93749	0.839687	1.24422	1.26318	1.43115	1.87426	2.19897	3.05247	3.86671	4.18432	4.09738	3.95189	3.37635	2.95569
Mississippi Territory	NA	0.0107744	1.32963	NA	NA	NA	NA	NA	NA	NA	NA	NA	NA	NA	NA	NA	NA	NA	NA	NA	NA	NA	NA
Missouri	NA	NA	NA	NA	1.73626	4.11222	8.03892	9.38205	9.74385	9.24623	8.73039	8.65133	8.48107	8.23311	7.48992	7.17272	6.62093	5.73795	5.98845	6.22823	6.1868	6.00176	5.59293
Missouri Territory	NA	NA	NA	1.49727	NA	NA	NA	NA	NA	NA	NA	NA	NA	NA	NA	NA	NA	NA	NA	NA	NA	NA	NA
Montana	NA	NA	NA	NA	NA	NA	NA	NA	NA	NA	1.25136	2.65994	2.2791	2.75076	2.99442	2.44828	2.41804	2.82748	2.84906	2.83487	2.79285	2.67972	2.69927
Montana Territory	NA	NA	NA	NA	NA	NA	NA	NA	0.769108	1.12331	NA	NA	NA	NA	NA	NA	NA	NA	NA	NA	NA	NA	NA
Nebraska	NA	NA	NA	NA	NA	NA	NA	NA	2.86718	2.38077	6.17455	5.99826	6.6366	7.07243	7.12478	7.33855	7.3455	7.33725	7.31398	6.90618	6.766	6.63958	6.51585
Nebraska Territory	NA	NA	NA	NA	NA	NA	NA	1.71127	NA	NA	NA	NA	NA	NA	NA	NA	NA	NA	NA	NA	NA	NA	NA
Nevada	NA	NA	NA	NA	NA	NA	NA	NA	1.806	2.07239	1.05633	1.63686	1.63101	2.23424	2.45605	2.29706	2.21379	2.54074	2.98333	3.03556	3.2163	3.44164	3.5067
New Hampshire	-0.0185119	-0.589673	-1.1058	-1.1842	-0.0701529	-0.105998	0.33481	0.525599	0.712736	0.983078	1.45724	1.7116	1.9037	2.02512	1.99834	1.93799	1.8468	1.62829	1.52366	1.44856	1.37888	1.38897	1.35828
New Jersey	-0.924808	-0.87077	-0.912911	-0.480182	0.0983358	0.656779	1.99852	1.89588	2.06325	2.15632	2.17905	2.20636	2.17336	2.0356	1.8444	1.75153	1.55992	1.11105	0.828129	0.626165	0.377966	0.300628	0.241175
New Mexico	NA	NA	NA	NA	NA	NA	NA	NA	NA	NA	NA	NA	NA	0.77467	1.57729	2.34646	3.80861	4.13416	4.44871	4.42122	4.37923	4.20095	4.2044
New Mexico Territory	NA	NA	NA	NA	NA	NA	0.545175	0.406964	0.319307	0.461909	0.801587	1.20885	0.337379	NA	NA	NA	NA	NA	NA	NA	NA	NA	NA
New York	1.30508	1.05796	1.86723	2.2107	4.262	5.4251	5.98015	6.11534	5.69528	5.62894	5.40649	5.46848	5.42121	4.45538	3.80346	3.68727	3.4314	2.88874	2.65229	2.49129	2.52964	2.60457	2.5798
North Carolina	1.00206	1.01391	0.906967	1.06461	0.584198	0.67975	0.724922	0.796404	1.09151	1.08648	0.949585	1.05716	1.18203	1.3981	1.97281	1.99987	2.20113	2.60936	2.8771	2.85845	3.1853	3.67475	4.16518
North Dakota	NA	NA	NA	NA	NA	NA	NA	NA	NA	NA	2.0608	1.59105	1.32173	1.78925	2.11574	2.35833	2.63751	2.70074	2.86152	2.89542	3.18541	3.54193	3.87995
Northwest Territory	NA	0.703366	NA	NA	NA	NA	NA	NA	NA	NA	NA	NA	NA	NA	NA	NA	NA	NA	NA	NA	NA	NA	NA
Ohio	NA	NA	0.846577	1.03415	1.10676	1.83241	5.13368	6.61619	6.24743	5.83443	5.32152	5.05629	5.17211	5.34187	5.39606	5.29785	5.05717	4.82581	4.56426	4.14276	3.95754	3.86867	3.7189
Oklahoma	NA	NA	NA	NA	NA	NA	NA	NA	NA	NA	NA	NA	2.67756	2.84066	4.1632	4.67353	5.32807	5.5506	5.61174	5.38391	5.2858	5.23579	5.12225
Oklahoma Territory	NA	NA	NA	NA	NA	NA	NA	NA	NA	NA	0.210351	0.22995	NA	NA	NA	NA	NA	NA	NA	NA	NA	NA	NA
Oregon	NA	NA	NA	NA	NA	NA	NA	0.554856	0.861368	1.58404	4.0517	4.33608	5.05186	5.24074	5.17138	4.95907	4.66693	4.37136	3.74344	2.84466	2.63269	2.42118	2.39394
Oregon Territory	NA	NA	NA	NA	NA	NA	0.730334	NA	NA	NA	NA	NA	NA	NA	NA	NA	NA	NA	NA	NA	NA	NA	NA
Orleans Territory	NA	NA	3.54172	NA	NA	NA	NA	NA	NA	NA	NA	NA	NA	NA	NA	NA	NA	NA	NA	NA	NA	NA	NA
Pennsylvania	1.0872	1.9073	2.39735	3.30578	4.14334	4.81949	5.76865	6.12888	5.81063	6.02194	5.62087	5.41567	5.15631	5.17567	4.9793	4.90111	4.92501	4.53209	4.25047	3.84695	3.55003	3.2396	3.03665
Puerto Rico	NA	NA	NA	NA	NA	NA	NA	NA	NA	NA	NA	NA	NA	NA	NA	NA	NA	NA	NA	NA	NA	NA	4.15225
Rhode Island	-0.0258033	0.283954	0.730935	0.995858	1.21581	1.36692	1.43851	1.44758	1.47848	1.48541	1.48433	1.48855	1.49079	1.49318	1.4921	1.48847	1.47812	1.4421	1.41093	1.38506	1.38036	1.37394	1.37265
South Carolina	3.28913	2.87665	2.88291	3.25192	3.27205	3.15968	2.12957	2.05851	3.07396	2.99047	0.593853	1.75754	1.77506	1.77947	1.8194	1.84749	2.02544	2.18714	2.20564	1.97609	1.77398	1.67915	1.61469
South Dakota	NA	NA	NA	NA	NA	NA	NA	NA	NA	NA	1.28179	1.19242	0.906719	2.24369	2.81495	3.46088	3.99365	4.2964	4.45574	4.59443	4.76487	4.9924	4.91926
Tennessee	NA	0.66693	0.732225	0.649514	1.136	0.966123	1.06765	1.72935	2.70989	2.69398	3.70433	4.28816	4.58835	4.64541	4.84707	4.91541	5.16501	5.50457	5.62637	5.43761	5.43539	5.20353	4.78253
Texas	NA	NA	NA	NA	NA	NA	1.79608	0.933334	0.86699	1.31926	1.82899	1.76313	3.11869	4.38334	5.84433	6.74283	7.06727	7.52888	8.15872	8.62758	8.27153	8.05113	7.81275
Utah	NA	NA	NA	NA	NA	NA	NA	NA	NA	NA	NA	3.36952	3.95982	4.17605	4.25063	4.21646	4.04628	4.07663	3.97483	3.90245	3.84926	3.70113	3.40549
Utah Territory	NA	NA	NA	NA	NA	NA	1.6623	1.70877	1.82752	2.30456	3.07566	NA	NA	NA	NA	NA	NA	NA	NA	NA	NA	NA	NA
Vermont	-0.165062	-0.0349934	-0.123566	0.258497	-0.261877	-0.147229	-0.542205	-0.487748	-0.28248	-0.326921	0.0319097	-0.0632554	0.104736	0.051497	0.189654	0.274618	0.558342	0.958252	1.49268	1.62156	1.78378	1.942	2.09596
Virginia	9.12801	0.71061	0.666627	0.65556	0.781272	1.19975	1.75429	2.69934	2.86714	2.92028	3.58258	2.70801	4.08775	4.8206	4.93082	4.52533	4.00999	3.99022	4.45126	5.23144	5.95699	6.13998	5.82243
Washington	NA	NA	NA	NA	NA	NA	NA	NA	NA	NA	2.65703	3.24312	3.6945	4.22595	4.34492	4.29041	4.35949	4.47685	4.49825	4.2244	4.16102	3.96595	3.85819
Washington Territory	NA	NA	NA	NA	NA	NA	NA	1.65372	2.32884	1.04143	NA	NA	NA	NA	NA	NA	NA	NA	NA	NA	NA	NA	NA
West Virginia	NA	NA	NA	NA	NA	NA	NA	NA	1.51017	1.6218	1.73908	1.68496	1.85659	2.1974	2.16883	2.57229	2.97393	3.62391	3.47985	3.15861	3.11096	2.87113	2.53799
Wisconsin	NA	NA	NA	NA	NA	NA	0.553161	1.42119	1.9041	3.62528	5.85034	6.59536	7.08691	7.24148	7.43847	7.37488	7.24724	7.01916	6.46823	5.86291	5.54715	4.95605	4.63943
Wisconsin Territory	NA	NA	NA	NA	NA	1.19681	NA	NA	NA	NA	NA	NA	NA	NA	NA	NA	NA	NA	NA	NA	NA	NA	NA
Wyoming	NA	NA	NA	NA	NA	NA	NA	NA	NA	NA	1.58369	1.15763	0.971488	0.697183	1.12405	1.31685	1.73696	2.12792	1.91489	1.63825	1.62159	1.70412	1.62315
Wyoming Territory	NA	NA	NA	NA	NA	NA	NA	NA	0.266291	0.219293	NA	NA	NA	NA	NA	NA	NA	NA	NA	NA	NA	NA	NA

## Sheet: k_c
STATE	1790	1800	1810	1820	1830	1840	1850	1860	1870	1880	1890	1900	1910	1920	1930	1940	1950	1960	1970	1980	1990	2000	2010
Alabama	NA	NA	NA	7.14723	6.27871	2.95738	2.18921	2.66992	5.57276	4.55445	12.2577	24.8832	41.354	47.2705	50.3931	47.6323	41.5434	36.2327	33.7113	30.1444	26.0506	22.7914	18.4451
Alaska	NA	NA	NA	NA	NA	NA	NA	NA	NA	NA	NA	NA	NA	NA	NA	NA	NA	14.1055	20.7868	17.2657	17.2947	18.3761	18.2267
Alaska Territory	NA	NA	NA	NA	NA	NA	NA	NA	NA	1	1	1	NA	1.07802	1.69616	1.81119	2.08807	NA	NA	NA	NA	NA	NA
Arizona	NA	NA	NA	NA	NA	NA	NA	NA	NA	NA	NA	NA	NA	7.00367	9.09437	9.36974	8.95	9.14256	9.60374	9.7431	10.9761	11.4191	11.5263
Arizona Territory	NA	NA	NA	NA	NA	NA	NA	NA	2.09265	4.38504	2.03909	2.73077	2.36248	NA	NA	NA	NA	NA	NA	NA	NA	NA	NA
Arkansas	NA	NA	NA	NA	NA	5.60326	3.72588	2.59436	11.9577	6.12467	7.68989	13.5512	17.1555	19.5401	21.0596	23.2923	29.0277	38.3212	41.6453	41.2885	38.177	28.0243	21.2355
Arkansas Territory	NA	NA	NA	4.41163	2.08974	NA	NA	NA	NA	NA	NA	NA	NA	NA	NA	NA	NA	NA	NA	NA	NA	NA	NA
California	NA	NA	NA	NA	NA	NA	5.65259	18.36	39.2998	40.218	34.0773	28.6537	20.5148	28.2249	43.3454	46.4236	46.8245	46.6693	43.1914	39.1338	36.7723	34.4201	31.771
Colorado	NA	NA	NA	NA	NA	NA	NA	NA	NA	13.4037	43.8801	40.9368	42.7541	46.1303	45.5555	47.0177	46.5804	34.6357	21.0184	11.0462	9.07321	8.16743	7.68315
Colorado Territory	NA	NA	NA	NA	NA	NA	NA	NA	4.83699	NA	NA	NA	NA	NA	NA	NA	NA	NA	NA	NA	NA	NA	NA
Connecticut	2.27338	2.04617	2.1124	2.33022	1.64968	1.67705	1.55417	1.55318	1.56268	1.78551	1.93703	1.91017	1.733	1.5221	1.37	1.3382	1.29685	1.28593	1.29982	1.28955	1.28736	1.29131	1.28811
Dakota Territory	NA	NA	NA	NA	NA	NA	NA	NA	2.92247	8.49638	NA	NA	NA	NA	NA	NA	NA	NA	NA	NA	NA	NA	NA
Delaware	1.5	1.5	1.5	1.5	1.5	1.5	1.5	1.5	1.5	1.5	1.5	1.5	1.5	1.5	1.5	1.5	1.5	1.5	1.5	1.5	1.5	1.5	1.5
District Of Columbia	NA	NA	1.38128	NA	2.35352	2.74115	1.5	NA	NA	NA	NA	NA	NA	NA	NA	NA	NA	NA	NA	NA	NA	NA	NA
Florida	NA	NA	NA	NA	NA	NA	4.50499	3.27687	3.73088	2.83036	3.02187	4.83028	11.4943	14.9444	12.8925	15.6536	20.4514	20.354	19.6131	16.9699	14.6468	13.496	12.3585
Florida Territory	NA	NA	NA	NA	3.4808	5.61605	NA	NA	NA	NA	NA	NA	NA	NA	NA	NA	NA	NA	NA	NA	NA	NA	NA
Georgia	5.95144	1.89845	1.7751	1.9945	1.87144	2.81452	3.04811	6.36031	11.1975	10.7899	24.2289	32.9425	57.2131	68.8683	90.376	96.1222	83.8772	65.5149	51.6543	38.4752	31.3756	30.1525	28.6201
Hawaii	NA	NA	NA	NA	NA	NA	NA	NA	NA	NA	NA	NA	NA	NA	NA	NA	NA	3.19497	2.3274	3.1928	3.16287	3.12166	3.0808
Hawaii Territory	NA	NA	NA	NA	NA	NA	NA	NA	NA	NA	NA	1.65896	1.90301	2.29234	2.23007	2.27613	2.30536	NA	NA	NA	NA	NA	NA
Idaho	NA	NA	NA	NA	NA	NA	NA	NA	NA	NA	4.71556	1.58916	1.84652	4.58608	4.60898	5.75876	8.04817	9.72407	11.8931	15.4623	17.9918	20.3891	20.4044
Idaho Territory	NA	NA	NA	NA	NA	NA	NA	NA	2.98627	3.42117	NA	NA	NA	NA	NA	NA	NA	NA	NA	NA	NA	NA	NA
Illinois	NA	NA	NA	10.6762	7.15178	4.57778	11.7401	46.3557	78.446	90.1907	96.6269	97.9333	98.1702	98.4049	98.5473	98.4221	97.978	96.8553	95.5351	93.3483	91.1298	88.7746	85.4698
Illinois Territory	NA	NA	1	NA	NA	NA	NA	NA	NA	NA	NA	NA	NA	NA	NA	NA	NA	NA	NA	NA	NA	NA	NA
Indian Territory	NA	NA	NA	NA	NA	NA	NA	NA	NA	NA	NA	2.64462	NA	NA	NA	NA	NA	NA	NA	NA	NA	NA	NA
Indiana	NA	NA	NA	3.25881	4.59318	3.03069	3.26216	5.19217	15.5338	25.263	33.5698	37.1986	40.4595	39.5677	32.6925	33.1278	31.8326	32.2817	33.1972	31.4947	33.7444	33.3489	31.3893
Indiana Territory	NA	2.17599	1.68841	NA	NA	NA	NA	NA	NA	NA	NA	NA	NA	NA	NA	NA	NA	NA	NA	NA	NA	NA	NA
Iowa	NA	NA	NA	NA	NA	NA	5.19999	3.88239	3.07674	3.77507	8.05061	10.7289	16.5781	24.367	24.5763	27.627	27.6283	27.1409	24.8387	25.1194	29.9093	32.7306	35.8818
Iowa Territory	NA	NA	NA	NA	NA	2.86513	NA	NA	NA	NA	NA	NA	NA	NA	NA	NA	NA	NA	NA	NA	NA	NA	NA
Kansas	NA	NA	NA	NA	NA	NA	NA	NA	7.80393	2.53808	4.90866	7.68147	13.3624	17.2449	22.5498	23.3447	31.9661	38.4545	32.1782	31.7523	33.211	35.6336	38.0216
Kansas Territory	NA	NA	NA	NA	NA	NA	NA	23.0705	NA	NA	NA	NA	NA	NA	NA	NA	NA	NA	NA	NA	NA	NA	NA
Kentucky	NA	2.55674	2.88796	3.3452	3.829	10.8347	34.794	59.3341	67.6385	67.9354	75.7871	79.9565	80.6748	81.4839	77.951	78.092	84.18	90.3284	90.3972	83.2736	78.5496	74.2143	70.7103
Louisiana	NA	NA	NA	17.0085	24.6825	32.7239	38.4155	42.1804	46.9679	49.9524	51.1217	48.8827	48.1103	53.0261	49.8386	47.225	41.5721	31.3469	21.5305	14.7108	12.5559	11.196	8.98431
Louisiana Territory	NA	NA	1.71327	NA	NA	NA	NA	NA	NA	NA	NA	NA	NA	NA	NA	NA	NA	NA	NA	NA	NA	NA	NA
Maine	NA	NA	NA	1.51504	1.51762	1.96351	1.86066	2.51567	3.01191	3.07421	2.89145	2.95443	2.84324	3.13852	3.09688	3.05809	3.49897	3.32085	3.60272	3.62052	3.96641	4.45458	4.49755
Maryland	3.48708	2.91429	4.83502	7.23937	8.50408	15.7354	16.9135	17.5636	19.3132	19.657	20.879	20.7432	20.1525	21.3862	20.825	20.2355	17.3281	9.84263	5.0859	3.88135	3.42696	3.50329	3.6966
Massachusetts	13.6437	13.9141	13.1913	2.53625	2.16744	1.88462	1.92468	1.97903	2.27991	2.67219	2.61569	2.66816	2.6033	2.61945	2.78221	2.84254	2.90264	3.51782	4.01653	4.11791	3.93324	3.87895	3.74166
Michigan	NA	NA	NA	NA	NA	4.19288	5.30168	8.47571	13.4899	20.9749	35.4214	46.6706	57.9909	72.6855	73.6718	73.2087	71.3499	63.0062	53.8664	44.6857	38.088	33.2445	27.375
Michigan Territory	NA	NA	1.73132	3.61287	3.90222	NA	NA	NA	NA	NA	NA	NA	NA	NA	NA	NA	NA	NA	NA	NA	NA	NA	NA
Minnesota	NA	NA	NA	NA	NA	NA	NA	4.29798	4.28145	12.7878	31.8811	32.7882	34.8889	37.6033	43.3732	45.0179	48.3197	50.0589	49.6952	46.8101	45.7166	42.7933	40.5791
Minnesota Territory	NA	NA	NA	NA	NA	NA	3.65802	NA	NA	NA	NA	NA	NA	NA	NA	NA	NA	NA	NA	NA	NA	NA	NA
Mississippi	NA	NA	NA	3.67037	3.33841	3.04416	2.57216	2.38181	3.08603	3.84064	3.28866	4.53532	4.80295	5.03222	7.17542	9.96997	16.1108	22.2548	24.86	23.7923	22.4336	16.6416	12.6312
Mississippi Territory	NA	1.5	4.43566	NA	NA	NA	NA	NA	NA	NA	NA	NA	NA	NA	NA	NA	NA	NA	NA	NA	NA	NA	NA
Missouri	NA	NA	NA	NA	5.94089	25.8425	74.6383	95.7049	100.798	93.6997	84.5736	83.3837	79.6293	74.6872	62.537	57.9346	49.2331	35.0928	39.8898	45.1061	45.4443	43.6619	38.683
Missouri Territory	NA	NA	NA	4.33552	NA	NA	NA	NA	NA	NA	NA	NA	NA	NA	NA	NA	NA	NA	NA	NA	NA	NA	NA
Montana	NA	NA	NA	NA	NA	NA	NA	NA	NA	NA	3.37677	10.4755	9.63094	12.144	13.6449	9.27723	8.48672	11.2254	11.0649	11.0315	10.7795	9.88053	9.82883
Montana Territory	NA	NA	NA	NA	NA	NA	NA	NA	2.44771	3.87417	NA	NA	NA	NA	NA	NA	NA	NA	NA	NA	NA	NA	NA
Nebraska	NA	NA	NA	NA	NA	NA	NA	NA	12.7188	11.1085	47.5767	46.337	53.6594	58.7798	59.0178	61.7539	61.2818	60.4847	60.5165	54.6711	52.387	50.3588	48.4761
Nebraska Territory	NA	NA	NA	NA	NA	NA	NA	4.61416	NA	NA	NA	NA	NA	NA	NA	NA	NA	NA	NA	NA	NA	NA	NA
Nevada	NA	NA	NA	NA	NA	NA	NA	NA	5.78001	7.35035	3.5902	5.16776	5.41937	7.82455	8.73067	7.77758	6.1892	7.92435	10.6961	11.0274	12.1214	13.4255	13.7863
New Hampshire	2.09446	1.94672	2.8751	2.95779	2.48394	2.25075	1.88253	2.12214	2.4762	3.17944	4.4646	5.26174	5.79943	6.19375	6.13356	5.94004	5.64277	4.78527	4.24484	3.81869	3.52061	3.53824	3.46169
New Jersey	3.23949	2.99812	3.12983	2.55459	3.02292	3.35242	7.93064	7.20256	6.62924	6.73731	6.73657	6.77222	6.6323	6.18286	5.67029	5.42131	4.84451	3.40533	2.82709	2.55582	2.1305	2.04918	2.0131
New Mexico	NA	NA	NA	NA	NA	NA	NA	NA	NA	NA	NA	NA	NA	3.35825	6.64363	10.674	19.1989	21.3434	23.4936	23.2399	23.0178	21.6608	21.6258
New Mexico Territory	NA	NA	NA	NA	NA	NA	2.64887	2.01483	2.46289	2.58472	3.37569	4.19625	3.51898	NA	NA	NA	NA	NA	NA	NA	NA	NA	NA
New York	4.74269	4.05462	8.55776	10.0198	27.1687	37.3674	42.1411	42.872	37.7075	36.2816	33.4296	33.8019	33.0743	22.908	18.0063	17.0704	15.0032	11.2562	9.71594	8.60803	8.87922	9.32539	9.15648
North Carolina	3.69433	4.28957	3.71933	4.21361	2.57887	3.04163	3.04004	3.73269	4.87183	5.54153	4.78056	4.70821	4.66052	5.13455	7.64792	7.80176	8.83934	11.2034	12.6806	12.4032	14.8671	18.8979	23.1737
North Dakota	NA	NA	NA	NA	NA	NA	NA	NA	NA	NA	6.71406	5.33885	4.62268	7.27183	8.8766	10.3003	11.4312	10.6734	10.7873	11.159	13.2392	16.3657	19.3496
Northwest Territory	NA	2.47645	NA	NA	NA	NA	NA	NA	NA	NA	NA	NA	NA	NA	NA	NA	NA	NA	NA	NA	NA	NA	NA
Ohio	NA	NA	2.73029	4.30485	5.16769	10.0574	39.8313	54.3581	47.5794	40.8411	33.0677	29.9412	32.3562	36.2581	37.1478	35.8956	33.0579	30.4534	27.4118	22.7872	20.4803	19.5136	18.0767
Oklahoma	NA	NA	NA	NA	NA	NA	NA	NA	NA	NA	NA	NA	13.8904	13.1097	22.9213	27.451	32.7414	34.2713	34.991	32.4851	31.4647	30.9075	29.9022
Oklahoma Territory	NA	NA	NA	NA	NA	NA	NA	NA	NA	NA	2.26484	2.23591	NA	NA	NA	NA	NA	NA	NA	NA	NA	NA	NA
Oregon	NA	NA	NA	NA	NA	NA	NA	2.60579	3.02812	6.56951	20.5827	22.9734	28.25	30.2001	29.6502	28.0126	25.7263	23.4042	18.5411	11.9307	10.3134	8.66982	8.4527
Oregon Territory	NA	NA	NA	NA	NA	NA	2.08954	NA	NA	NA	NA	NA	NA	NA	NA	NA	NA	NA	NA	NA	NA	NA	NA
Orleans Territory	NA	NA	14.8678	NA	NA	NA	NA	NA	NA	NA	NA	NA	NA	NA	NA	NA	NA	NA	NA	NA	NA	NA	NA
Pennsylvania	4.1111	8.48895	11.3035	17.5941	24.4182	30.5203	40.3545	44.3356	40.6216	42.5551	37.149	34.1847	31.1718	31.4396	29.1907	28.315	28.5106	24.7406	22.477	19.3805	17.213	14.8896	13.5622
Puerto Rico	NA	NA	NA	NA	NA	NA	NA	NA	NA	NA	NA	NA	NA	NA	NA	NA	NA	NA	NA	NA	NA	NA	24.3165
Rhode Island	1.80076	2.03224	2.42912	2.68398	2.94463	3.0926	3.17253	3.18498	3.2231	3.23141	3.23006	3.23516	3.23782	3.24088	3.23938	3.23453	3.2211	3.1719	3.12968	3.08913	3.08824	3.08149	3.08066
South Carolina	13.5527	12.3089	12.8526	15.1057	15.3908	14.7911	8.7817	8.3529	14.415	14.6792	2.18873	6.41937	5.74613	5.62813	5.7334	5.78969	6.37904	7.13681	7.24896	6.33823	5.54128	5.1914	4.86525
South Dakota	NA	NA	NA	NA	NA	NA	NA	NA	NA	NA	5.40188	5.00723	4.69358	11.3814	15.2502	20.188	23.7905	24.0958	25.6774	26.5526	27.7843	30.429	29.6743
Tennessee	NA	2.42074	2.89512	2.33692	3.54371	3.35763	3.76062	7.34724	13.5023	13.2204	20.0535	25.1459	26.9187	26.8287	28.1748	28.9107	32.0556	36.0821	37.7279	35.8321	36.0009	33.6029	28.993
Texas	NA	NA	NA	NA	NA	NA	7.63753	3.47479	3.13106	4.1457	7.07084	6.29884	16.5568	27.5498	43.2089	56.8859	60.3152	67.243	77.349	88.5179	81.7814	78.5951	76.2061
Utah	NA	NA	NA	NA	NA	NA	NA	NA	NA	NA	NA	14.8366	18.7532	20.6117	21.0612	20.7845	19.49	19.7226	19.004	18.4134	18.0231	16.9058	14.635
Utah Territory	NA	NA	NA	NA	NA	NA	4.30421	5.00251	5.94649	8.40915	12.7848	NA	NA	NA	NA	NA	NA	NA	NA	NA	NA	NA	NA
Vermont	1.5429	1.94993	2.07194	2.40886	2.81064	2.57915	2.30702	2.53804	2.44523	2.7217	2.85631	2.28057	2.22915	2.05273	2.01628	2.14702	2.71714	3.66878	5.26059	5.74615	6.36134	6.94387	7.51495
Virginia	85.1572	3.21205	3.10502	2.80314	3.05632	4.39856	7.5128	15.3962	14.8533	14.617	19.7641	15.059	28.22	33.3745	34.2314	30.2168	22.6396	21.1998	27.2402	38.9343	48.1953	51.2411	46.7581
Washington	NA	NA	NA	NA	NA	NA	NA	NA	NA	NA	9.55636	14.1961	17.5536	22.171	23.2715	22.8402	23.2834	24.2648	24.4227	22.2752	21.7118	20.158	19.3014
Washington Territory	NA	NA	NA	NA	NA	NA	NA	5.12687	8.25848	2.93612	NA	NA	NA	NA	NA	NA	NA	NA	NA	NA	NA	NA	NA
West Virginia	NA	NA	NA	NA	NA	NA	NA	NA	5.69839	6.31372	6.95865	6.57607	6.80342	8.63538	8.67815	11.6521	14.8478	20.2139	18.8217	16.5424	16.1533	14.1226	11.2567
Wisconsin	NA	NA	NA	NA	NA	NA	2.76427	5.06427	8.43272	22.2331	43.2316	51.1697	56.481	58.0737	60.1484	59.4252	57.9526	55.3443	49.2418	42.3764	38.6904	32.0568	28.4662
Wisconsin Territory	NA	NA	NA	NA	NA	3.4394	NA	NA	NA	NA	NA	NA	NA	NA	NA	NA	NA	NA	NA	NA	NA	NA	NA
Wyoming	NA	NA	NA	NA	NA	NA	NA	NA	NA	NA	4.79691	3.57809	3.6959	3.08221	3.82334	4.6075	6.16698	6.99603	5.84069	4.86909	5.0402	5.4663	5.07855
Wyoming Territory	NA	NA	NA	NA	NA	NA	NA	NA	2.09735	2.09812	NA	NA	NA	NA	NA	NA	NA	NA	NA	NA	NA	NA	NA

[truncated: 6 more sheets: m_d, v_d, s_d, k_d, cov_ac, cor_ac]
