# Supplementary material for: Analyzing and interpreting spatial and temporal variability of the United States county population distributions using Taylor's law
Source: PLoS One. 2019 Dec 11;14(12):e0226096. doi: 10.1371/journal.pone.0226096 (PMC6905577; doi:10.1371/journal.pone.0226096)
Supplement: S9 Table — (XLSX) [file pone.0226096.s061.xlsx]

## Sheet: Sheet1
Table S9. Diagnostic statistics of the ols linear regression for spatial hierarchical Taylor's law, using count and density separately. Except columns "measure," "year," and "outlier," all columns show the p-value of the corresponding hypothesis test and census. "outlier" column shows the name of the outlier(s), if any
measure	year	linear model
		no outliers?	outlier	normality (Shapiro-Wilk)	homoscedasticity (Breusch-Pagan)	skewness (gvlma)	kurtosis (gvlma)	homoscedasticity (gvlma)	global test (gvlma)	Moran's I (dist=1000 km)	Moran's I (dist=750 km)
count	1790	0.0664	na	0.1326	0.525	0.3318	0.2296	0.423	0.4068	0.5195	0.0744
	1800	0.1267	na	0.4526	0.002*	0.5274	0.2736	0.0399	0.2014	0.8167	0.4697
	1810	0.1289	na	0.2219	0.0768	0.3021	0.3601	0.0386	0.1089	0.4228	0.1903
	1820	0.0006*	Delaware	0.0019*	0.0271	0.0041	<0.0001*	0.0565	<0.0001*	0.5212	0.7773
	1830	0.017*	Delaware	0.1791	0.0456	0.1026	0.054	0.1554	0.0478	0.6174	0.6569
	1840	0.2079	na	0.6391	0.1186	0.8043	0.5549	0.1859	0.6995	0.7385	0.6607
	1850	1	na	0.2831	0.2177	0.5909	0.3658	0.5976	0.7916	0.7392	0.3725
	1860	1	na	0.2171	0.1571	0.6002	0.2389	0.6318	0.5328	0.5235	0.2732
	1870	1	na	0.3547	0.1233	0.5023	0.3633	0.7758	0.8081	0.3007	0.4504
	1880	1	na	0.0365	0.1373	0.3317	0.2142	0.1659	0.1309	0.4512	0.5803
	1890	1	na	0.1827	0.3804	0.5862	0.1858	0.3824	0.4563	0.3216	0.2945
	1900	<0.0001*	Alaska Territory	<0.0001*	0.1086	<0.0001*	<0.0001*	<0.0001*	<0.0001*	0.0993	0.2356
	1910	0.6141	na	0.1343	0.4526	0.4341	0.226	0.4546	0.5569	0.0909	0.246
	1920	0.4049	na	0.5612	0.7537	0.9707	0.5593	0.1239	0.4258	0.0041	0.0562
	1930	0.2099	na	0.4527	0.6071	0.695	0.8442	0.0536	0.2329	0.0003*	0.0057
	1940	0.2484	na	0.6007	0.5214	0.7406	0.8584	0.0558	0.26	0.0002*	0.0047
	1950	0.4234	na	0.5172	0.2787	0.8074	0.4709	0.2451	0.467	<0.0001*	0.0001*
	1960	0.3315	na	0.3914	0.1894	0.8901	0.5661	0.86	0.5014	<0.0001*	<0.0001*
	1970	0.3214	na	0.3069	0.2457	0.7726	0.5409	0.932	0.4227	<0.0001*	<0.0001*
	1980	0.2852	na	0.5195	0.1709	0.8051	0.79	0.7976	0.6119	<0.0001*	<0.0001*
	1990	0.3646	na	0.5484	0.1594	0.9207	0.7495	0.7168	0.6925	<0.0001*	<0.0001*
	2000	0.4495	na	0.6054	0.1431	0.9912	0.7465	0.7789	0.8568	<0.0001*	<0.0001*
	2010	0.6842	na	0.7333	0.1229	0.8722	0.7314	0.8475	0.9582	<0.0001*	<0.0001*
density	1790	0.3829	na	0.251	0.1054	0.6215	0.7546	0.0682	0.1658	0.2307	0.5075
	1800	0.4543	na	0.2468	0.1676	0.9284	0.5751	0.4223	0.2965	0.3127	0.3784
	1810	0.5646	na	0.8386	0.0963	0.8279	0.565	0.7063	0.7782	0.6524	0.2603
	1820	0.3892	na	0.5551	0.0734	0.9395	0.714	0.7022	0.3375	0.447	0.5462
	1830	0.6215	na	0.6217	0.1016	0.8985	0.5948	0.4258	0.5548	0.3834	0.5351
	1840	0.2529	na	0.18	0.051	0.1606	0.7565	0.4591	0.1667	0.2933	0.4198
	1850	0.1763	na	0.4086	0.0385	0.1559	0.9603	0.5038	0.073	0.2404	0.2789
	1860	1	na	0.3125	0.1028	0.6663	0.231	0.8142	0.0235	0.0026	0.022
	1870	0.8539	na	0.6421	0.0246	0.5167	0.4718	0.6034	0.4947	0.0029	0.0777
	1880	1	na	0.4796	0.0311	0.8171	0.4159	0.8853	0.4262	0.0014*	0.0384
	1890	1	na	0.2078	0.0737	0.8639	0.1792	0.8661	0.3906	0.0003*	0.0187
	1900	1	na	0.1556	0.4644	0.9016	0.1581	0.8284	0.5998	<0.0001*	0.0103
	1910	1	na	0.231	0.692	0.7341	0.1718	0.6	0.4423	<0.0001*	0.0093
	1920	1	na	0.1705	0.6058	0.8473	0.1763	0.7531	0.4938	<0.0001*	0.0093
	1930	1	na	0.1852	0.5159	0.8814	0.1818	0.7934	0.6537	<0.0001*	0.0083
	1940	1	na	0.2168	0.4009	0.8255	0.2151	0.7794	0.7063	<0.0001*	0.0012*
	1950	1	na	0.4081	0.2306	0.9837	0.2946	0.9493	0.893	<0.0001*	0.0003*
	1960	1	na	0.5918	0.3353	0.8346	0.3185	0.879	0.8966	<0.0001*	<0.0001*
	1970	0.6913	na	0.6055	0.2335	0.7402	0.3514	0.9769	0.8864	<0.0001*	<0.0001*
	1980	0.7736	na	0.5041	0.2668	0.6721	0.2885	0.8707	0.8109	<0.0001*	<0.0001*
	1990	0.6206	na	0.4786	0.2127	0.5231	0.2978	0.7315	0.7634	<0.0001*	<0.0001*
	2000	0.6343	na	0.3283	0.2464	0.4847	0.2962	0.7951	0.7808	<0.0001*	<0.0001*
	2010	0.7895	na	0.3185	0.2764	0.5687	0.2707	0.7496	0.7898	<0.0001*	0.0008*
