# Supplementary material for: Analyzing and interpreting spatial and temporal variability of the United States county population distributions using Taylor's law
Source: PLoS One. 2019 Dec 11;14(12):e0226096. doi: 10.1371/journal.pone.0226096 (PMC6905577; doi:10.1371/journal.pone.0226096)
Supplement: S10 Table — (XLSX) [file pone.0226096.s062.xlsx]

## Sheet: Sheet1
Table S10. Diagnostic statistics of the ols quadratic regression for spatial hierarchical quadratic Taylor's law, using count and density separately. Column definitions and notations follow Table S9
measure	year	quadratic model
		no outliers?	outlier	normality (Shapiro-Wilk)	homoscedasticity (Breusch-Pagan)	skewness (gvlma)	kurtosis (gvlma)	homoscedasticity (gvlma)	global test (gvlma)	Moran's I (dist=1000 km)	Moran's I (dist=750 km)
count	1790	0.1265	na	0.1657	0.7057	0.6468	0.1777	0.9799	0.625	0.4168	0.2724
	1800	0.0321*	Massachusetts	0.571	0.0033	0.3445	0.4304	0.045	0.0609	0.8587	0.473
	1810	0.1086	na	0.2624	0.2001	0.1308	0.4937	0.0435	0.0517	0.1942	0.1598
	1820	0.0009*	Delaware	0.0015*	0.0195	0.0035	<0.0001*	0.0691	<0.0001*	0.4898	0.7049
	1830	0.0183*	Delaware	0.1098	0.0242	0.1451	0.0337	0.3308	0.0963	0.617	0.6057
	1840	0.2388	na	0.631	0.1186	0.8065	0.5096	0.157	0.6427	0.7261	0.65
	1850	1	na	0.2409	0.2546	0.5731	0.3638	0.4992	0.6954	0.7615	0.3676
	1860	1	na	0.1082	0.2494	0.5926	0.1847	0.5344	0.3968	0.4138	0.2067
	1870	1	na	0.5388	0.1234	0.5172	0.4415	0.6738	0.8773	0.147	0.2937
	1880	1	na	0.0938	0.0732	0.2907	0.2487	0.1313	0.2958	0.1478	0.287
	1890	0.9721	na	0.1314	0.3914	0.4323	0.1952	0.2696	0.4683	0.3257	0.2921
	1900	<0.0001*	Alaska Territory	<0.0001*	0.1396	<0.0001*	<0.0001*	<0.0001*	<0.0001*	0.0274	0.2058
	1910	0.7422	na	0.2408	0.5059	0.533	0.2234	0.494	0.5527	0.0693	0.24
	1920	0.456	na	0.6856	0.9702	0.806	0.5111	0.1441	0.3202	0.0021*	0.0562
	1930	0.2342	na	0.6938	0.8981	0.5066	0.8292	0.0605	0.1821	0.0002*	0.0089
	1940	0.2411	na	0.7935	0.7135	0.5072	0.9216	0.0571	0.2036	0.0002*	0.0093
	1950	0.5596	na	0.9247	0.3319	0.8742	0.619	0.2031	0.5844	<0.0001*	0.0008*
	1960	0.4521	na	0.9225	0.2299	0.8613	0.8826	0.7224	0.9501	<0.0001*	<0.0001*
	1970	0.446	na	0.8838	0.285	0.9333	0.8562	0.8174	0.9712	<0.0001*	<0.0001*
	1980	0.4035	na	0.6713	0.1795	0.9049	0.9812	0.9736	0.9935	<0.0001*	<0.0001*
	1990	0.5181	na	0.6729	0.1504	0.9209	0.8576	0.9332	0.9993	<0.0001*	<0.0001*
	2000	0.6043	na	0.7019	0.1513	0.9431	0.7172	0.9715	0.9951	<0.0001*	<0.0001*
	2010	0.8468	na	0.6664	0.1357	0.9253	0.6654	0.9703	0.9886	<0.0001*	<0.0001*
density	1790	0.4593	na	0.6097	0.1697	0.6006	0.8833	0.3542	0.8051	0.7309	0.566
	1800	0.146	na	0.631	0.0712	0.246	0.6795	0.342	0.4558	0.5651	0.2021
	1810	0.6678	na	0.6992	0.0545	0.948	0.5668	0.6933	0.9427	0.6709	0.2404
	1820	0.225	na	0.4195	0.3175	0.3344	0.939	0.5877	0.0727	0.1207	0.3923
	1830	0.8055	na	0.4778	0.0359	0.7126	0.6571	0.5335	0.8185	0.3857	0.52
	1840	0.3504	na	0.0186	0.0061	0.0577	0.3128	0.8229	0.1727	0.421	0.5279
	1850	0.4682	na	0.2018	0.0042	0.1512	0.8858	0.6914	0.6374	0.4698	0.5151
	1860	0.1879	na	0.3171	0.6464	0.1499	0.8754	0.5357	0.3215	0.2265	0.0607
	1870	0.795	na	0.503	0.2414	0.6233	0.3595	0.5679	0.0304	0.0056	0.0987
	1880	1	na	0.4519	0.2293	0.6458	0.4559	0.7176	0.1797	0.0013*	0.0262
	1890	1	na	0.3315	0.206	0.8923	0.1834	0.8663	0.3777	0.0003*	0.0226
	1900	1	na	0.1026	0.7664	0.7601	0.1707	0.6973	0.216	<0.0001*	0.0307
	1910	1	na	0.213	0.7047	0.3701	0.2612	0.525	0.626	<0.0001*	0.1412
	1920	1	na	0.21	0.5147	0.5523	0.2415	0.8022	0.7629	<0.0001*	0.0091
	1930	1	na	0.2091	0.4444	0.6913	0.2147	0.8275	0.7375	<0.0001*	0.0054
	1940	1	na	0.2487	0.3666	0.6532	0.2566	0.809	0.8022	<0.0001*	0.0007*
	1950	1	na	0.3876	0.2287	0.9981	0.2907	0.9506	0.8906	<0.0001*	0.0002*
	1960	1	na	0.613	0.324	0.8497	0.3315	0.9058	0.811	<0.0001*	0.0001*
	1970	0.812	na	0.5578	0.2313	0.7147	0.3161	0.9064	0.8854	<0.0001*	0.0001*
	1980	0.9405	na	0.5224	0.2328	0.663	0.2622	0.9551	0.7507	<0.0001*	0.0001*
	1990	0.7546	na	0.4448	0.1709	0.535	0.282	0.8082	0.5795	<0.0001*	0.0001*
	2000	0.7214	na	0.3019	0.2127	0.5052	0.2902	0.8512	0.5246	<0.0001*	<0.0001*
	2010	0.8728	na	0.3953	0.2482	0.6051	0.2769	0.803	0.4784	<0.0001*	0.0007*
