# Supplementary material for: Analyzing and interpreting spatial and temporal variability of the United States county population distributions using Taylor's law
Source: PLoS One. 2019 Dec 11;14(12):e0226096. doi: 10.1371/journal.pone.0226096 (PMC6905577; doi:10.1371/journal.pone.0226096)
Supplement: S11 Table — (XLSX) [file pone.0226096.s063.xlsx]

## Sheet: Sheet1
Table S11. Diagnostic statistics of the ols linear regression for spatial Taylor's law, using count and density separately. Column definitions and notations follow Table S9
measure	state	ols linear model
		no outliers? (Bonf.p)	outliers	normality (Shapiro-Wilk)	homoscedasticity (Breusch-Pagan)	1st-order autocorrelation (Durbin-Watson)	skewness (gvlma)	kurtosis (gvlma)	homoscedasticity (gvlma)	global test (gvlma)
count	Alabama	0.17283	na	0.942443	0.039689	<0.0001*	0.98314	0.606629	0.0616824	0.00920074
	Alaska	0.215054	na	0.658449	0.195582	0.551781	0.632039	0.569547	0.305066	0.785179
	Alaska Territory	0.0446*	1900	0.983762	0.0370188	0.27877	0.800865	0.761463	0.73143	0.949092
	Arizona	0.15927	na	0.503474	0.31576	0.0004*	0.525018	0.710701	0.289591	0.0365056
	Arizona Territory	1	na	0.492007	0.86063	0.372858	0.956105	0.492641	0.983642	0.925838
	Arkansas	1	na	0.0202154	0.918418	<0.0001*	0.75905	0.161608	0.806269	0.0244244
	California	0.165237	na	0.659525	0.861061	0.0007*	0.353089	0.933859	0.854023	0.0539609
	Colorado	<0.0001*	1880	0.00536289	0.00500542	0.0384545	0.00553082	0.0131299	0.0061616	<0.0001*
	Connecticut	1	na	0.0305715	0.410581	<0.0001*	0.694917	0.150406	0.37491	0.0001*
	Delaware	0.0066*	1790	0.00430437	0.217633	<0.0001*	0.00870691	0.0770493	0.113382	<0.0001*
	Florida	1	na	0.473996	0.741975	<0.0001*	0.883344	0.286934	0.653656	0.513375
	Georgia	0.478271	na	0.70601	0.86462	<0.0001*	0.470875	0.560568	0.624785	0.796368
	Hawaii	0.861223	na	0.890032	0.897786	0.383697	0.74434	0.660151	0.558381	0.872312
	Hawaii Territory	0.444359	na	0.99545	0.340974	0.125225	0.926226	0.649246	0.365707	0.433127
	Idaho	0.0106*	1910	0.00132245	0.338432	0.0546593	0.00602373	0.0433236	0.0101095	0.0007*
	Illinois	0.749119	na	0.365814	0.0419624	<0.0001*	0.499708	0.450269	0.035864	0.0912164
	Indiana	0.567169	na	0.203599	0.0307181	<0.0001*	0.495348	0.49067	0.0203258	0.00320706
	Iowa	1	na	0.220598	0.825156	<0.0001*	0.517527	0.331398	0.902841	0.0363689
	Kansas	0.0040*	1870	0.197717	0.0453927	<0.0001*	0.775089	0.471382	0.109295	0.00346764
	Kentucky	0.0449*	1800	0.00869061	0.150664	0.0006*	0.0261662	0.581808	0.359713	0.0760123
	Louisiana	0.244109	na	0.222115	0.14333	0.0006*	0.219247	0.713904	0.297291	0.00490747
	Maine	0.0055*	1830	0.0123946	0.349556	0.0544928	0.0101215	0.0234221	0.0638164	0.00101959
	Maryland	1	na	0.025095	0.35997	<0.0001*	0.549012	0.175485	0.320819	0.0001*
	Massachusetts	0.597017	na	0.00439482	<0.0001*	<0.0001*	0.178424	0.568827	<0.0001*	0.0002*
	Michigan	1	na	0.106167	0.312721	<0.0001*	0.386516	0.373081	0.388067	0.570495
	Minnesota	0.0547926	na	0.686879	0.00839897	0.00783864	0.50768	0.795367	0.0192121	0.0182172
	Mississippi	1	na	0.0194087	0.351389	<0.0001*	0.780554	0.159768	0.412649	0.0114667
	Missouri	0.880503	na	0.591201	0.0191092	0.00219043	0.80493	0.455593	0.115501	0.0418961
	Montana	0.0033*	1910	0.00427541	0.379535	0.0376031	0.00609662	0.0209688	0.0746695	0.00275649
	Nebraska	0.0013*	1870	0.245124	0.140259	0.00254643	0.786675	0.274156	0.264692	0.00446043
	Nevada	0.436881	na	0.734172	0.708998	0.0003*	0.62084	0.611069	0.75258	0.2602
	New Hampshire	0.0010*	1800	0.00289658	0.219999	0.0002*	0.00102228	<0.0001*	0.00870177	<0.0001*
	New Jersey	1	na	0.0269435	0.4909	<0.0001*	0.87918	0.135034	0.501152	0.0001*
	New Mexico	1	na	0.265834	0.904692	0.0007*	0.820033	0.337792	0.924557	0.0493432
	New Mexico Territory	0.991229	na	0.544245	0.782746	0.0407351	0.759809	0.474505	0.560575	0.915307
	New York	1	na	0.014782	0.626953	<0.0001*	0.419548	0.20831	0.651711	0.000905397
	North Carolina	1	na	0.774352	0.152364	0.0001*	0.865561	0.367725	0.173396	0.0289665
	North Dakota	1	na	0.512847	0.411652	<0.0001*	0.872088	0.328678	0.505057	0.681316
	Ohio	0.817459	na	0.45984	0.668849	<0.0001*	0.985009	0.366014	0.697863	0.88112
	Oklahoma	0.867707	na	0.15358	0.443163	<0.0001*	0.413919	0.475271	0.706368	0.263002
	Oregon	1	na	0.365552	0.668852	<0.0001*	0.996702	0.325086	0.576392	0.0375967
	Pennsylvania	0.0175*	1790	0.0127976	0.298254	<0.0001*	0.019243	0.290678	0.306181	0.0006*
	Rhode Island	1	na	0.00239019	0.773292	<0.0001*	0.853337	0.0978661	0.745005	0.0001*
	South Carolina	0.504265	na	0.170417	0.393625	<0.0001*	0.363632	0.858151	0.33961	0.00791545
	South Dakota	0.0459*	1890	0.0769659	0.598003	0.0001*	0.862344	0.241637	0.53942	0.0308799
	Tennessee	0.686105	na	0.848835	0.165128	<0.0001*	0.974154	0.453477	0.17111	0.603138
	Texas	0.987893	na	0.895344	0.756604	0.0001*	0.914132	0.414732	0.788657	0.843558
	Utah	0.151602	na	0.345023	0.649291	<0.0001*	0.278741	0.778355	0.625657	0.0101542
	Utah Territory	0.662886	na	0.914685	0.394105	0.182034	0.867233	0.551975	0.418921	0.463694
	Vermont	0.0600793	na	0.342623	0.0260739	0.0002*	0.220124	0.997236	0.035749	0.048371
	Virginia	<0.0001*	1790	<0.0001*	0.851515	0.00435726	<0.0001*	<0.0001*	<0.0001*	<0.0001*
	Washington	0.988188	na	0.150484	0.72554	<0.0001*	0.753498	0.293763	0.59747	0.020424
	West Virginia	0.103547	na	0.873481	0.0297451	0.0001*	0.981236	0.736767	0.0460302	0.00434483
	Wisconsin	1	na	0.387562	0.314461	<0.0001*	0.860299	0.309713	0.300816	0.335432
	Wyoming	0.225194	na	0.683264	0.096655	0.00173431	0.37156	0.935382	0.0806675	0.244631
density	Alabama	0.153606	na	0.567321	0.069589	<0.0001*	0.966462	0.531812	0.107057	0.00165577
	Alaska	0.45091	na	0.886242	0.410467	0.0005*	0.652223	0.678489	0.283801	0.471597
	Alaska Territory	0.0435*	1900	0.00662404	0.625408	0.677624	0.102937	0.658743	0.552168	0.501056
	Arizona	1	na	0.48834	0.981459	<0.0001*	0.856423	0.38264	0.954268	0.0362606
	Arizona Territory	0.242712	na	0.143725	0.840712	0.0374017	0.90532	0.42339	0.869282	0.224186
	Arkansas	0.898426	na	0.0343974	0.784826	<0.0001*	0.998266	0.16581	0.811017	0.0123889
	California	0.0002*	1850	0.0136494	0.106571	<0.0001*	0.336783	0.314114	0.645942	0.00136375
	Colorado	0.149005	na	0.369975	0.182728	<0.0001*	0.228363	0.995621	0.0867014	0.0332034
	Connecticut	1	na	0.00901942	0.970743	<0.0001*	0.81548	0.113936	0.970453	<0.0001*
	Delaware	0.614986	na	0.0390881	0.844488	<0.0001*	0.209261	0.459672	0.756621	0.0002*
	Florida	1	na	0.361342	0.883738	<0.0001*	0.643809	0.330543	0.886875	0.881055
	Georgia	0.0347*	1790	0.299886	0.0224297	0.0004*	0.14872	0.428711	0.0700005	0.104843
	Hawaii	0.265021	na	0.316693	0.905578	0.647358	0.356552	0.988487	0.27717	0.725289
	Hawaii Territory	0.0412*	1900	0.965391	0.166156	0.273684	0.758992	0.720461	0.17063	0.155714
	Idaho	0.0334*	1890	0.893917	0.0718579	0.0001*	0.93984	0.767135	0.0860122	0.0103479
	Illinois	0.356364	na	0.167141	0.0320772	<0.0001*	0.144995	0.889857	0.0107499	0.00303288
	Indiana	0.905159	na	0.123103	0.0462871	<0.0001*	0.418885	0.444386	0.026817	0.0026063
	Iowa	1	na	0.256566	0.750068	<0.0001*	0.533668	0.333976	0.979439	0.0438404
	Kansas	0.261818	na	0.632411	0.0595479	0.00903268	0.608533	0.565044	0.141281	0.598797
	Kentucky	0.0421*	1800	0.36825	0.0156544	<0.0001*	0.177705	0.973101	0.0609644	0.00104379
	Louisiana	0.0317*	1820	0.00175527	0.275859	<0.0001*	0.0371723	0.905562	0.884304	0.0003*
	Maine	0.515031	na	0.319371	0.0655175	0.0001*	0.4298	0.746655	0.0318501	0.0520941
	Maryland	1	na	0.0453867	0.326062	<0.0001*	0.246347	0.367473	0.770322	0.0109977
	Massachusetts	0.0003*	1790	0.0232568	0.000242776	<0.0001*	0.0205406	0.169915	0.0470881	<0.0001*
	Michigan	1	na	0.136569	0.257711	<0.0001*	0.384479	0.40328	0.318816	0.491407
	Minnesota	0.815143	na	0.0057884	0.440183	0.00420947	0.211768	0.419391	0.626843	0.482047
	Mississippi	1	na	0.138872	0.236246	<0.0001*	0.797503	0.207807	0.286005	0.00673771
	Missouri	0.686638	na	0.800239	0.653089	0.0001*	0.574782	0.543779	0.306714	0.756376
	Montana	0.303485	na	0.208975	0.926392	0.0003*	0.300883	0.674967	0.197704	0.190684
	Nebraska	0.0001*	1870	0.514911	0.00131291	0.0973839	0.523359	0.955454	0.0108363	0.00227899
	Nevada	0.591472	na	0.29854	0.394084	<0.0001*	0.791958	0.307558	0.880458	0.00575563
	New Hampshire	0.550117	na	0.666628	0.0342221	0.0002*	0.37961	0.779561	0.0211001	0.180698
	New Jersey	1	na	0.0233115	0.525728	<0.0001*	0.464137	0.19839	0.587829	0.0002*
	New Mexico	0.487602	na	0.20919	0.807844	<0.0001*	0.665716	0.395011	0.784055	0.0357852
	New Mexico Territory	0.0746476	na	0.143466	0.384081	0.383628	0.472653	0.544487	0.610528	0.179423
	New York	0.0234*	1790	0.141009	0.0364957	<0.0001*	0.152312	0.50927	0.029389	0.0002*
	North Carolina	0.529775	na	0.426113	0.0450436	<0.0001*	0.992977	0.419069	0.0488715	0.00102651
	North Dakota	1	na	0.399789	0.412296	<0.0001*	0.69511	0.36002	0.32984	0.4516
	Ohio	0.0874226	na	0.963662	0.0217292	<0.0001*	0.797725	0.985139	0.0531204	0.102987
	Oklahoma	0.896401	na	0.166522	0.531955	<0.0001*	0.443199	0.474854	0.808303	0.162605
	Oregon	0.59757	na	0.118153	0.664722	<0.0001*	0.699232	0.252839	0.791658	0.003337
	Pennsylvania	0.351246	na	0.0438771	0.938196	<0.0001*	0.157346	0.577549	0.730423	0.003101
	Rhode Island	0.487995	na	0.290583	0.718283	<0.0001*	0.726759	0.388782	0.827275	0.00117164
	South Carolina	1	na	0.183185	0.450439	<0.0001*	0.518103	0.287548	0.462827	0.00275869
	South Dakota	0.110311	na	0.0608594	0.994559	<0.0001*	0.893944	0.235219	0.818362	0.0792189
	Tennessee	1	na	0.348845	0.277602	<0.0001*	0.99829	0.24678	0.2808	0.028864
	Texas	0.672693	na	0.967921	0.599879	<0.0001*	0.901086	0.523052	0.646437	0.333408
	Utah	0.0134*	1900	0.0303299	0.151999	0.0002*	0.0805218	0.69188	0.168039	0.00299662
	Utah Territory	0.0148*	1860	0.929653	0.134717	0.651536	0.806729	0.690688	0.175542	0.545405
	Vermont	0.699523	na	0.198004	0.232029	<0.0001*	0.853959	0.21967	0.311111	0.00247311
	Virginia	0.933075	na	0.0195942	0.0317971	0.0157883	0.222759	0.641552	0.00930521	0.0002*
	Washington	1	na	0.0228985	0.706472	<0.0001*	0.744309	0.235433	0.824217	0.00991543
	West Virginia	1	na	0.351432	0.571219	0.0001*	0.83485	0.326708	0.294392	0.233465
	Wisconsin	1	na	0.134717	0.452317	<0.0001*	0.648939	0.266592	0.390492	0.085076
	Wyoming	0.282719	na	0.28488	0.688964	0.00677123	0.233517	0.960347	0.276588	0.24972
