# Supplementary material for: Analyzing and interpreting spatial and temporal variability of the United States county population distributions using Taylor's law
Source: PLoS One. 2019 Dec 11;14(12):e0226096. doi: 10.1371/journal.pone.0226096 (PMC6905577; doi:10.1371/journal.pone.0226096)
Supplement: S12 Table — (XLSX) [file pone.0226096.s064.xlsx]

## Sheet: Sheet1
Table S12. Diagnostic statistics of the ols quadratic regression for spatial quadratic Taylor's law, using count and density separately. Column definitions and notations follow Table S9
measure	state	ols quadratic model
		no outliers? (Bonf.p)	outliers	normality (Shapiro-Wilk)	homoscedasticity (Breusch-Pagan)	1st-order autocorrelation (Durbin-Watson)	skewness (gvlma)	kurtosis (gvlma)	homoscedasticity (gvlma)	global test (gvlma)
count	Alabama	0.718753	na	0.748385	0.129882	<0.0001*	0.690754	0.378929	0.141203	0.052501
	Alaska	0.257286	na	0.943179	0.110765	0.297052	0.66339	0.676247	0.191533	0.096581
	Alaska Territory	0.100166	na	0.862769	0.781198	0.439313	0.988503	0.906953	0.478449	0.950689
	Arizona	0.158854	na	0.144794	0.352493	0.00885306	0.34209	0.654495	0.327775	0.0383988
	Arizona Territory	0.253668	na	0.312234	0.883182	0.243306	0.487743	0.731665	0.640277	0.646884
	Arkansas	1	na	0.334774	0.826822	0.0002*	0.584056	0.383012	0.849588	0.646773
	California	0.0471*	1860	0.264587	0.00961417	0.323786	0.302916	0.544205	0.0151118	0.00419752
	Colorado	0.0004*	1880, 1890	0.0227766	0.0001*	0.328268	0.813421	0.0712755	0.0006*	0.00178995
	Connecticut	0.56555	na	0.948381	0.00227132	<0.0001*	0.849835	0.771737	0.00330046	0.0002*
	Delaware	<0.0001*	1790	0.0001*	<0.0001*	0.0362236	0.0003*	<0.0001*	<0.0001*	<0.0001*
	Florida	1	na	0.263045	0.375844	<0.0001*	0.624237	0.310774	0.374586	0.00794368
	Georgia	0.359207	na	0.952709	0.491289	<0.0001*	0.594048	0.717313	0.272947	0.0353385
	Hawaii	0.175815	na	0.55914	0.874891	0.398053	0.547954	0.907897	0.310491	0.78227
	Hawaii Territory	1	na	0.463303	0.504859	0.27603	0.958656	0.604777	0.5379	0.439149
	Idaho	0.0256*	1910	0.00212979	0.547098	0.00943864	0.0110018	0.142994	0.0381835	0.00680173
	Illinois	1	na	0.0246931	0.677452	<0.0001*	0.776362	0.168552	0.644018	0.0006*
	Indiana	1	na	0.330538	0.617047	<0.0001*	0.863194	0.272131	0.614387	0.0179357
	Iowa	0.0268*	1850	0.979149	0.0789988	0.00100088	0.928432	0.556293	0.105344	0.00160688
	Kansas	1	na	0.229394	0.425795	<0.0001*	0.813574	0.314341	0.468992	0.443354
	Kentucky	0.11914	na	0.180053	0.730668	0.0001*	0.289614	0.751873	0.50633	0.0220198
	Louisiana	0.759672	na	0.597027	0.152023	0.139903	0.74859	0.699248	0.15944	0.660007
	Maine	0.0021*	1830	0.00185319	0.0118886	0.581688	0.00208324	0.0001*	0.0003*	<0.0001*
	Maryland	0.442863	na	0.0831842	0.49868	0.0004*	0.136585	0.825085	0.637942	0.00540189
	Massachusetts	0.304947	na	0.0006*	<0.0001*	<0.0001*	0.0218187	0.363119	<0.0001*	<0.0001*
	Michigan	1	na	0.109442	0.705863	<0.0001*	0.5558	0.260409	0.846138	0.00576253
	Minnesota	0.537465	na	0.168253	0.89965	0.00423965	0.302616	0.559572	0.825475	0.0474003
	Mississippi	1	na	0.203804	0.961382	<0.0001*	0.830916	0.230195	0.87471	0.0744017
	Missouri	0.144071	na	0.247512	0.028048	0.0457859	0.772436	0.980097	0.0281036	0.24682
	Montana	0.0006*	1910	0.00102693	0.266848	0.0271786	0.00164212	0.00314085	0.0572966	0.0001*
	Nebraska	1	na	0.331552	0.566393	0.0001*	0.752601	0.332459	0.998953	0.890186
	Nevada	0.0329*	1910	0.069698	0.0704252	0.017425	0.131566	0.0686342	0.0270933	0.0215381
	New Hampshire	<0.0001*	1800	<0.0001*	0.0777759	0.032601	<0.0001*	<0.0001*	0.0001*	<0.0001*
	New Jersey	0.117191	na	0.702012	0.0033988	0.0001*	0.899147	0.943642	0.00667833	0.00117776
	New Mexico	0.0360*	1940	0.0824215	0.177329	0.758484	0.092004	0.424692	0.190459	0.213466
	New Mexico Territory	0.276939	na	0.428759	0.860986	0.0640931	0.800623	0.462342	0.675709	0.156959
	New York	0.699746	na	0.773724	0.064886	<0.0001*	0.500952	0.831137	0.0469947	0.0002*
	North Carolina	1	na	0.100084	0.901897	0.00286196	0.861886	0.229805	0.95118	0.0592549
	North Dakota	1	na	0.299195	0.212394	<0.0001*	0.887659	0.355036	0.564033	0.876224
	Ohio	1	na	0.557399	0.952178	<0.0001*	0.977487	0.345727	0.933301	0.00355782
	Oklahoma	1	na	0.676222	0.463199	0.0006*	0.958207	0.538314	0.225611	0.68825
	Oregon	0.0029*	1880	0.011983	0.00807997	0.0187607	0.0164997	0.0073262	0.00564463	<0.0001*
	Pennsylvania	0.0017*	1790	0.0288272	0.00128702	0.00179259	0.00928131	0.0083638	0.00424019	<0.0001*
	Rhode Island	0.919241	na	0.0826398	0.116394	<0.0001*	0.233303	0.451383	0.232339	0.019768
	South Carolina	0.460033	na	0.827862	0.416668	<0.0001*	0.503144	0.672977	0.257738	0.0555344
	South Dakota	0.541396	na	0.839212	0.555851	0.0007*	0.438996	0.755934	0.921356	0.941014
	Tennessee	0.775753	na	0.674567	0.407868	<0.0001*	0.842304	0.332323	0.409166	0.00513788
	Texas	1	na	0.878947	0.310447	<0.0001*	0.996636	0.424303	0.322185	0.0995388
	Utah	0.763885	na	0.983107	0.750842	0.13984	0.952448	0.623403	0.742299	0.175563
	Utah Territory	0.311738	na	0.0783752	0.480597	0.282813	0.541771	0.5615	0.561705	0.222171
	Vermont	0.0715488	na	0.689683	0.0131074	0.00117425	0.475814	0.599994	0.0246632	0.200029
	Virginia	<0.0001*	1790	<0.0001*	0.950354	0.0003*	<0.0001*	<0.0001*	<0.0001*	<0.0001*
	Washington	0.659211	na	0.890667	0.641349	0.07131	0.792299	0.889451	0.500265	0.122137
	West Virginia	0.123067	na	0.10298	0.195462	0.111762	0.0723986	0.506776	0.32049	0.243241
	Wisconsin	1	na	0.157428	0.69786	<0.0001*	0.754131	0.245055	0.682135	0.00783812
	Wyoming	0.361027	na	0.989533	0.453731	0.0004*	0.687149	0.949705	0.47891	0.136974
density	Alabama	1	na	0.876976	0.110004	<0.0001*	0.97833	0.444589	0.105936	0.285939
	Alaska	0.636331	na	0.690845	0.296756	0.0134398	0.52412	0.737903	0.173519	0.435926
	Alaska Territory	0.0105*	1900	0.045107	0.768426	0.420489	0.188859	0.960671	0.753222	0.095542
	Arizona	0.313526	na	0.683668	0.761623	0.0204169	0.393195	0.818979	0.850234	0.133277
	Arizona Territory	0.517114	na	0.437353	0.955571	0.924354	0.661851	0.64425	0.995851	0.979783
	Arkansas	1	na	0.394895	0.520799	<0.0001*	0.730262	0.376882	0.635797	0.489031
	California	0.0100*	1850	0.50628	0.814898	<0.0001*	0.981232	0.335461	0.998214	0.0119964
	Colorado	1	na	0.121116	0.662972	0.0003*	0.489679	0.349527	0.197675	0.297866
	Connecticut	0.0133*	1830	0.125905	0.00203877	0.224963	0.0517887	0.0586638	0.00493898	0.00268499
	Delaware	0.0009*	1810	0.0004*	<0.0001*	0.832421	0.0463167	<0.0001*	<0.0001*	<0.0001*
	Florida	1	na	0.366327	0.855846	<0.0001*	0.641271	0.332941	0.857787	0.00397879
	Georgia	0.0262*	1790	0.792241	0.670008	<0.0001*	0.40735	0.882858	0.769327	0.00248743
	Hawaii	0.0627588	na	0.540705	0.905311	0.356212	0.471341	0.923206	0.311023	0.754222
	Hawaii Territory	0.0025*	1910	0.42152	0.320023	0.436904	0.384778	0.848555	0.324132	0.367034
	Idaho	0.578928	na	0.756445	0.846184	0.0001*	0.563678	0.587429	0.927355	0.18711
	Illinois	1	na	0.100927	0.775048	<0.0001*	0.67524	0.233538	0.969313	0.0341595
	Indiana	1	na	0.223269	0.605128	<0.0001*	0.827965	0.269353	0.609192	0.0535443
	Iowa	0.0575942	na	0.948561	0.132399	0.0004*	0.815221	0.496933	0.154541	0.00210295
	Kansas	0.0039*	1870	0.64554	0.0519242	0.00366446	0.611873	0.572618	0.12771	0.00299043
	Kentucky	0.536104	na	0.274296	0.0851796	<0.0001*	0.633317	0.854617	0.049208	0.0265905
	Louisiana	0.0342*	2010	0.280167	0.0782196	<0.0001*	0.213193	0.374831	0.0118459	0.0332969
	Maine	1	na	0.142844	0.772906	<0.0001*	0.651737	0.313371	0.63299	0.0319567
	Maryland	0.555655	na	0.792031	0.181886	0.0001*	0.705415	0.891393	0.0946113	0.202273
	Massachusetts	0.613606	na	0.0852471	0.257588	0.0002*	0.638437	0.215706	0.866255	0.364035
	Michigan	1	na	0.137313	0.692481	<0.0001*	0.595424	0.258349	0.837757	0.00670115
	Minnesota	0.0016*	1860	0.101616	0.0380911	0.0110743	0.195775	0.735222	0.115156	0.0008*
	Mississippi	1	na	0.0484907	0.867554	<0.0001*	0.40046	0.27764	0.993768	0.0388786
	Missouri	0.781125	na	0.981975	0.526091	<0.0001*	0.665153	0.677577	0.269905	0.486751
	Montana	0.0770725	na	0.136291	0.269267	0.0003*	0.0928107	0.469342	0.306523	0.270104
	Nebraska	0.0551532	na	0.757803	0.663031	0.0304361	0.552225	0.64405	0.91527	0.0310908
	Nevada	0.143602	na	0.415359	0.566127	0.340527	0.18188	0.72527	0.527122	0.270061
	New Hampshire	0.182124	na	0.712988	0.0174294	0.0001*	0.427722	0.940304	0.0100842	0.00145798
	New Jersey	0.733957	na	0.883815	0.26139	<0.0001*	0.972318	0.418702	0.421712	0.0006*
	New Mexico	0.401857	na	0.700468	0.163478	0.334352	0.753373	0.546208	0.259479	0.704398
	New Mexico Territory	0.311437	na	0.481629	0.188823	0.132321	0.457807	0.761198	0.339704	0.28465
	New York	0.0038*	1790	0.151795	0.0100898	0.0007*	0.0688042	0.0798792	0.0171616	0.00667439
	North Carolina	0.796307	na	0.305233	0.627634	<0.0001*	0.304819	0.486419	0.584142	0.00111055
	North Dakota	0.0801348	na	0.860799	0.235252	<0.0001*	0.865621	0.419483	0.609447	0.307393
	Ohio	0.727892	na	0.618224	0.87971	<0.0001*	0.847562	0.419839	0.808284	0.00526952
	Oklahoma	1	na	0.655195	0.442871	0.00123327	0.989893	0.506666	0.216775	0.569516
	Oregon	0.0023*	1880	0.00731794	0.0418906	0.212534	0.00529599	0.0149946	0.0386293	0.0001*
	Pennsylvania	0.904272	na	0.155322	0.90564	<0.0001*	0.284264	0.524638	0.302285	0.343475
	Rhode Island	1	na	0.0499471	0.242629	<0.0001*	0.345858	0.321769	0.161387	0.0880053
	South Carolina	1	na	0.894806	0.417099	<0.0001*	0.966018	0.387097	0.360546	0.562418
	South Dakota	0.951262	na	0.975026	0.555076	0.0001*	0.762158	0.623695	0.769534	0.953446
	Tennessee	0.562092	na	0.956156	0.0926653	<0.0001*	0.863174	0.445753	0.0906495	0.0207188
	Texas	0.927278	na	0.762559	0.20749	<0.0001*	0.750507	0.521035	0.201265	0.154201
	Utah	0.0313*	1900	0.76759	0.133672	0.000865357	0.889855	0.43058	0.154417	0.0341019
	Utah Territory	0.193624	na	0.634373	0.113416	0.231648	0.711965	0.808534	0.0849592	0.32829
	Vermont	1	na	0.348203	0.988257	<0.0001*	0.550176	0.370538	0.612561	0.58358
	Virginia	0.0036*	1900	0.0305057	0.0879269	0.0005*	0.0390416	0.0950063	0.421336	0.00188605
	Washington	0.793164	na	0.826765	0.318265	0.276402	0.648592	0.506957	0.239003	0.386888
	West Virginia	1	na	0.783719	0.123459	0.0002*	0.994686	0.765679	0.0175229	0.217546
	Wisconsin	0.0254*	1850	0.787662	0.142622	<0.0001*	0.582671	0.507302	0.267501	0.00162352
	Wyoming	0.698813	na	0.992243	0.811659	0.0144324	0.902499	0.756342	0.802761	0.841654
