# Supplementary material for: Analyzing and interpreting spatial and temporal variability of the United States county population distributions using Taylor's law
Source: PLoS One. 2019 Dec 11;14(12):e0226096. doi: 10.1371/journal.pone.0226096 (PMC6905577; doi:10.1371/journal.pone.0226096)
Supplement: S13 Table — (XLSX) [file pone.0226096.s065.xlsx]

## Sheet: Sheet1
Table S13. Diagnostic statistics of the ols linear regression for temporal Taylor's law, using count and density separately. Column definitions and notations follow Table S9
measure	state	linear model
		no outliers? (Bonf.p)	outliers	normality (Shapiro-Wilk)	homoscedasticity (Breusch-Pagan)	skewness (gvlma)	kurtosis (gvlma)	homoscedasticity (gvlma)	global test (gvlma)	Moran's I (dist=500 km)	Moran's I (dist=250 km)
count	Alabama	0.260411	na	0.902127	0.196128	0.36105	0.917715	0.217515	0.288758	1	0.2915
	Alaska	0.0759353	na	0.0541463	0.241246	0.0340774	0.126468	0.0572686	0.0326509	na	na
	Alaska Territory	0.961895	na	0.278113	0.744402	0.912894	0.410717	0.827414	0.617716	na	na
	Arizona	0.462124	na	0.823718	0.458863	0.623604	0.581207	0.831898	0.24661	0.2823	0.3373
	Arizona Territory	0.483742	na	0.167188	0.933527	0.288835	0.608457	0.796136	0.300282	na	na
	Arkansas	0.0442*	Logan County	0.0372849	0.379557	0.020686	0.0243269	0.892195	0.0212821	na	<0.0001*
	Arkansas Territory	0.356087	na	0.946355	0.440174	0.999818	0.600233	0.410428	0.241055	na	na
	California	0.0050*, 0.0314*	Modoc County, San Francisco County	<0.0001*	0.402473	<0.0001*	<0.0001*	0.382455	<0.0001*	0.2934	0.0578
	Colorado	0.462605	na	0.994196	0.37206	0.843995	0.981256	0.169585	0.737453	0.7845	0.0138
	Connecticut	0.208148	na	0.917637	0.0633222	0.751238	0.846006	0.0855038	0.283175	1	1
	Dakota Territory	0.959144	na	0.0264741	0.936098	0.271601	0.511623	0.440453	0.229649	na	na
	District Of Columbia	0.758741	na	0.857458	0.846811	0.733069	0.654937	0.728484	0.763807	na	na
	Florida	<0.0001*	Miami-Dade County	<0.0001*	<0.0001*	<0.0001*	<0.0001*	0.139094	<0.0001*	0.001	0.0084
	Florida Territory	0.558922	na	0.362593	0.709071	0.445799	0.562272	0.615359	0.488306	na	na
	Georgia	0.579007	na	0.145438	0.427084	0.0600867	0.984881	0.0733173	0.150117	<0.0001*	<0.0001*
	Hawaii	0.592746	na	0.811395	0.360438	0.94411	0.564528	0.994763	0.536613	na	na
	Hawaii Territory	0.375007	na	0.40536	0.390634	0.436082	0.777711	0.164446	0.486439	na	na
	Idaho	1	na	0.266836	0.071151	0.681155	0.415369	0.168254	0.187865	0.1415	0.1522
	Idaho Territory	0.5926	na	0.0382988	0.474518	0.282615	0.640861	0.809789	0.83896	na	na
	Illinois	0.0930714	na	0.807013	0.0127093	0.623062	0.15698	0.0528168	0.0947814	0.0044	<0.0001*
	Indiana	0.14855	na	0.117008	0.160046	0.283747	0.104384	0.104795	0.0476133	na	0.5634
	Iowa	0.0356*	Jefferson County	0.00309065	0.319227	0.001167	0.127486	0.982116	<0.0001*	0.2413	<0.0001*
	Kansas	0.0782448	na	0.585949	0.00052166	0.613948	0.124808	0.324549	0.0002*	<0.0001*	<0.0001*
	Kentucky	0.1859	na	0.0586798	0.57473	0.0521652	0.119896	0.534442	0.124824	0.6804	0.6491
	Louisiana	0.145617	na	0.340506	0.805311	0.189086	0.453223	0.497102	0.584919	0.8175	0.0037
	Maine	0.0276*	Lincoln County	0.179872	0.133114	0.0818428	0.178241	0.961521	0.302157	na	0.5992
	Maryland	0.601529	na	0.508836	0.704673	0.393071	0.774168	0.524455	0.10064	na	0.0478
	Massachusetts	0.0599307	na	0.00834437	0.556408	0.0312124	0.58888	0.625676	0.155604	0.1043	<0.0001*
	Michigan	0.0040*	Dickinson County	0.0279475	0.0768208	0.0118573	0.00182243	0.412079	0.0004*	0.0021	<0.0001*
	Michigan Territory	0.369367	na	0.196713	0.262048	0.371319	0.699211	0.229469	0.410606	na	na
	Minnesota	0.463796	na	0.7966	0.0143024	0.737988	0.861089	0.963384	0.151142	0.0002*	0.0069
	Mississippi	0.181466	na	0.0685714	0.0511493	0.0314474	0.303286	0.947058	0.00987479	1	<0.0001
	Missouri	0.0296*	St. Louis city	0.17605	0.000325019	0.322483	0.128325	0.568777	0.0661986	0.358	0.9432
	Montana	0.583842	na	0.0577867	0.871504	0.0453488	0.687839	0.127781	0.0005*	0.4589	0.9026
	Montana Territory	0.0507199	na	0.0851543	0.947223	0.0927638	0.427422	0.126903	0.142958	na	na
	Nebraska	0.0172*, 0.0217*	Sarpy County, Unorganized Territory	0.00327243	0.269769	0.0220627	<0.0001*	0.033718	<0.0001*	0.2112	0.2003
	Nevada	1	na	0.122188	0.692685	0.494184	0.300385	0.997509	0.721176	0.1946	0.8506
	New Hampshire	1	na	0.443794	0.894528	0.925236	0.344557	0.965074	0.493081	1	1
	New Jersey	1	na	0.0795788	0.91668	0.752962	0.217958	0.252061	0.192575	1	1
	New Mexico	0.0464*	Cibola County	0.124469	0.493219	0.0466852	0.172468	0.354377	0.0459999	0.8906	0.4068
	New Mexico Territory	0.102894	na	0.186066	0.131502	0.264872	0.73725	0.304581	0.252622	na	na
	New York	0.0040*	Bronx County	0.133863	0.0839045	0.167327	0.0127919	0.680445	0.036443	0.3098	0.3173
	North Carolina	0.149955	na	0.032207	0.0128446	0.64202	0.211719	0.175198	0.147877	0.9572	0.5943
	North Dakota	0.107454	na	0.11547	0.459822	0.154648	0.107874	0.991672	0.00615315	0.887	0.801
	Ohio	0.0068*	Harrison County	0.0166193	0.383779	0.133643	0.0003*	0.851219	<0.0001*	na	0.4298
	Oklahoma	1	na	0.479889	0.0458475	0.851837	0.329133	0.767336	0.0474324	0.9192	0.2466
	Oklahoma Territory	0.0203*	Beaver County	0.735958	0.703355	0.944974	0.46452	0.790714	0.109021	na	na
	Oregon	0.32519	na	0.526117	0.803562	0.623398	0.56777	0.901908	0.454577	<0.0001*	<0.0001
	Pennsylvania	0.0634216	na	0.00362568	0.0291974	0.0357915	0.00268841	0.701652	0.00387247	na	0.65
	Rhode Island	1	na	0.905491	0.801286	0.923164	0.662237	0.694208	0.899359	1	1
	South Carolina	0.27139	na	0.0428054	0.390281	0.0528692	0.949555	0.344587	0.227738	na	0.7811
	South Dakota	<0.0001*	Pine Ridge Indian Reservation	<0.0001*	0.405418	<0.0001*	<0.0001*	0.00875313	<0.0001*	0.7572	0.4739
	Tennessee	0.0075*	James County	0.00454045	0.0248484	0.00126691	0.00589586	0.124341	0.0002*	<0.0001*	<0.0001*
	Texas	0.149391	na	0.0166873	0.0884642	0.00358923	0.316427	0.0227617	<0.0001*	<0.0001*	<0.0001*
	Utah	1	na	0.18375	0.190858	0.933161	0.194485	0.894938	0.763593	0.4507	0.2676
	Utah Territory	0.0001*	Morgan County	0.0001*	0.0801664	<0.0001*	<0.0001*	0.506361	<0.0001*	na	na
	Vermont	0.0064*	Chittenden County	0.092191	0.0403721	0.0774242	0.174472	0.313657	0.0607232	na	na
	Virginia	<0.0001*	Barbour County	<0.0001*	0.0350188	<0.0001*	<0.0001*	0.0537625	<0.0001*	0.585	0.0139
	Washington	0.0574251	na	0.172038	0.448082	0.093635	0.406922	0.701745	0.213821	0.0041	0.9519
	Washington Territory	1	na	0.96441	0.917871	0.965217	0.495444	0.230064	0.751876	na	na
	West Virginia	0.072604	na	0.0351732	0.393291	0.0397999	0.368569	0.472924	0.227647	na	0.5713
	Wisconsin	0.143088	na	0.00574295	0.384239	0.00472683	0.313348	0.69976	0.0413112	0.0203	<0.0001*
	Wyoming	0.462148	na	0.297572	0.505675	0.167932	0.971383	0.552209	0.264461	0.0473	0.3803
	Wyoming Territory	0.0271*	Sweetwater County	0.187909	0.253647	0.321986	0.927548	0.228897	0.588097	na	na
density	Alabama	0.27717	na	0.933176	0.0260334	0.888165	0.652477	0.144887	0.666407	1	0.0981
	Alaska	0.158353	na	0.0936197	0.468703	0.242536	0.215469	0.817595	0.555698	na	na
	Alaska Territory	0.883413	na	0.910439	0.640435	0.816375	0.563679	0.327173	0.841943	na	na
	Arizona	0.555064	na	0.617452	0.150599	0.443614	0.771089	0.866126	0.944285	0.9529	0.1823
	Arizona Territory	0.400668	na	0.0377886	0.809025	0.153981	0.816422	0.848995	0.679202	na	na
	Arkansas	0.0269*	Logan County	0.00336348	0.312331	0.00169811	0.00612868	0.67134	0.000819886	na	0.0014
	Arkansas Territory	0.22281	na	0.36307	0.703981	0.351528	0.980299	0.943711	0.911271	na	na
	California	<0.0001*	Klamath County	<0.0001*	<0.0001*	<0.0001*	<0.0001*	0.0207974	<0.0001*	0.1294	0.352
	Colorado	0.0055*	Denver County	0.806163	0.0001*	0.3302	0.368823	0.111264	0.0286544	0.7071	0.0218
	Connecticut	0.061822	na	0.167856	0.147279	0.241415	0.764054	0.0447982	0.20467	na	na
	Dakota Territory	0.113843	na	0.00686365	0.907522	0.0705517	0.826863	0.316789	0.360062	na	na
	District Of Columbia	0.603477	na	0.887281	0.961977	0.693709	0.818206	0.682796	0.972267	na	na
	Florida	<0.0001*	Miami-Dade County	<0.0001*	<0.0001*	<0.0001*	<0.0001*	0.145763	<0.0001*	0.0013	0.0162
	Florida Territory	0.249231	na	0.0314388	0.304293	0.100703	0.992308	0.848121	0.444859	na	na
	Georgia	1	na	0.0199546	0.569477	0.0157146	0.878019	0.0998722	0.0141158	0.0017	0.0002*
	Hawaii	0.268163	na	0.134749	0.930986	0.29905	0.907431	0.117884	0.210107	na	na
	Hawaii Territory	0.279725	na	0.101291	0.962322	0.300647	0.894374	0.875101	0.611663	na	na
	Idaho	1	na	0.215722	0.852649	0.290473	0.817523	0.00765236	0.00824282	0.1275	0.8941
	Idaho Territory	1	na	0.555974	0.666463	0.792161	0.494222	0.667963	0.946378	na	na
	Illinois	0.0111*	Cook County	0.157185	0.000785705	0.169521	0.0897388	0.238359	0.00653039	0.5221	0.1741
	Indiana	0.0084*	Union County	0.00351621	0.435795	0.00330311	<0.0001*	0.0325861	<0.0001*	na	0.713
	Iowa	0.0277*	Jefferson County	0.00192519	0.015594	0.0007*	0.0786145	0.853483	<0.0001*	0.2476	<0.0001*
	Kansas	0.0505736	na	0.26081	<0.0001*	0.593393	0.0313593	0.334295	0.000965406	<0.0001*	<0.0001*
	Kentucky	0.269432	na	0.252991	0.496783	0.0498531	0.714402	0.689257	0.228808	0.4376	0.3414
	Louisiana	0.21086	na	0.135046	0.369871	0.066045	0.896878	0.54164	0.428923	0.5307	0.0985
	Maine	0.133458	na	0.364734	0.47462	0.542909	0.812363	0.457553	0.906447	na	0.8658
	Maryland	0.0004*	Baltimore city	0.0314524	0.0406931	0.139352	0.606739	0.320257	0.0006*	na	0.0285
	Massachusetts	0.109223	na	0.342191	0.840229	0.144313	0.629543	0.37462	0.360035	0.1983	0.5104
	Michigan	0.0130*, 0.0266*	Dickinson County, Michilimackinac County	0.0159275	0.0007*	0.165838	<0.0001*	0.764236	<0.0001*	0.2273	0.0001*
	Michigan Territory	0.654967	na	0.918082	0.86392	0.679311	0.686663	0.796287	0.687567	na	na
	Minnesota	0.392395	na	0.930901	0.035788	0.548239	0.737355	0.969254	0.0530272	0.0006	0.0004
	Mississippi	0.18425	na	0.00519732	0.349093	0.0053713	0.126612	0.758596	0.0006*	1	0.0001*
	Missouri	0.0008*	St. Louis city	0.00604348	<0.0001*	0.099142	0.00386456	0.97379	<0.0001*	0.8724	0.5826
	Montana	0.391851	na	0.0277944	0.914738	0.0275007	0.487306	0.216343	0.00424217	0.6688	0.7822
	Montana Territory	0.183818	na	0.668113	0.466102	0.342631	0.895507	0.342251	0.640203	na	na
	Nebraska	0.0111*	Sarpy County	0.112498	0.446891	0.336431	0.0023597	0.172651	<0.0001*	0.1971	0.1501
	Nevada	0.337344	na	0.0870921	0.10345	0.471537	0.295644	0.744777	0.20731	0.9417	0.7578
	New Hampshire	0.535218	na	0.685719	0.783753	0.681292	0.67476	0.179246	0.0473971	1	1
	New Jersey	0.777015	na	0.268667	0.484465	0.55584	0.365588	0.155677	0.103956	na	na
	New Mexico	0.145262	na	0.139646	0.513036	0.0887742	0.71012	0.716811	0.514277	0.7543	0.5608
	New Mexico Territory	0.0044*	Sierra County	0.0004*	0.759899	0.000864227	0.0029906	0.169828	0.0002*	na	na
	New York	0.0030*	Bronx County	0.0331819	0.0006*	0.00597505	0.0252884	0.446557	0.0007*	0.4755	0.253
	North Carolina	0.148457	na	0.0213538	0.519507	0.0316427	0.507467	0.205794	0.0917315	0.768	0.1749
	North Dakota	0.0734467	na	0.022462	0.829557	0.0102624	0.267627	0.359528	0.0100513	0.7539	0.7119
	Ohio	0.0103*	Harrison County	0.0182521	0.79383	0.0393447	0.0004*	0.647848	<0.0001*	na	0.9191
	Oklahoma	1	na	0.383282	0.0683763	0.665992	0.325879	0.661894	0.08245	0.9189	0.1062
	Oklahoma Territory	0.0115*, 0.0258*	Beaver County, Greer County	0.0293289	0.154417	0.0724908	0.398673	0.672189	0.0424716	na	na
	Oregon	0.416695	na	0.0372182	0.722002	0.0481549	0.747358	0.852345	0.0887125	0.0041	<0.0001*
	Pennsylvania	0.0997428	na	0.0005*	0.58158	0.00151841	0.0952709	0.901589	0.00524636	na	0.9718
	Rhode Island	0.529038	na	0.593983	0.834984	0.486445	0.782537	0.531914	0.876309	1	1
	South Carolina	0.233616	na	0.00170981	0.611699	0.0050295	0.453456	0.228692	0.0307521	na	0.6765
	South Dakota	<0.0001*	Pine Ridge Indian Reservation	<0.0001*	0.0158545	<0.0001*	<0.0001*	0.00205988	<0.0001*	0.9419	0.7349
	Tennessee	0.0010*	James County	<0.0001*	0.0834993	<0.0001*	<0.0001*	0.220816	<0.0001*	0.0118	0.0284
	Texas	0.140694	na	<0.0001*	0.435715	<0.0001*	0.0236487	0.186137	<0.0001*	<0.0001*	<0.0001*
	Utah	0.466674	na	0.428493	0.279389	0.714278	0.429402	0.366081	0.654444	0.1086	0.0703
	Utah Territory	0.0008*	Morgan County	0.0002*	0.404969	0.0001*	<0.0001*	0.341857	<0.0001*	na	na
	Vermont	0.0042*	Chittenden County	0.0838553	0.129429	0.109219	0.546237	0.5877	0.0241221	na	na
	Virginia	0.0109*	Bedford city	0.0002*	0.00369319	<0.0001*	0.0004*	0.538703	<0.0001*	0.7444	0.2499
	Washington	0.0701753	na	0.0103295	0.415768	0.00611436	0.153936	0.478217	0.0383903	0.0196	0.9613
	Washington Territory	0.670091	na	0.560535	0.590441	0.618864	0.434791	0.917877	0.88721	na	na
	West Virginia	0.122932	na	0.0984437	0.876738	0.0484009	0.699846	0.241102	0.225917	na	0.7101
	Wisconsin	0.174271	na	0.0190732	0.00626174	0.052415	0.550473	0.817404	0.0214005	0.0053	0.001
	Wyoming	0.174224	na	0.0170539	0.224073	0.0305084	0.419958	0.399076	0.183311	0.2839	0.4832
	Wyoming Territory	0.0459*	Sweetwater County	0.209858	0.366243	0.885946	0.453317	0.574091	0.216637	na	na
