# Supplementary material for: Analyzing and interpreting spatial and temporal variability of the United States county population distributions using Taylor's law
Source: PLoS One. 2019 Dec 11;14(12):e0226096. doi: 10.1371/journal.pone.0226096 (PMC6905577; doi:10.1371/journal.pone.0226096)
Supplement: S14 Table — (XLSX) [file pone.0226096.s066.xlsx]

## Sheet: Sheet1
Table S14. Diagnostic statistics of the ols quadratic regression for temporal quadratic Taylor's law, using count and density separately. Column definitions and notations follow Table S9
measure	state	quadratic model
		no outliers? (Bonf.p)	outliers	normality (Shapiro-Wilk)	homoscedasticity (Breusch-Pagan)	skewness (gvlma)	kurtosis (gvlma)	homoscedasticity (gvlma)	global test (gvlma)	Moran's I (dist=500 km)	Moran's I (dist=250 km)
count	Alabama	0.387021	na	0.798983	0.0461988	0.494711	0.944835	0.385398	0.837063	na	0.3081
	Alaska	0.0937553	na	0.0589054	0.280968	0.033652	0.150243	0.0512726	0.0188654	na	na
	Alaska Territory	0.753266	na	0.622088	0.461854	0.782158	0.488359	0.642251	0.34828	na	na
	Arizona	0.710677	na	0.793699	0.207147	0.746986	0.680873	0.884508	0.981016	0.2777	0.7685
	Arizona Territory	0.508649	na	0.995076	0.608855	0.707051	0.953622	0.899053	0.962234	na	na
	Arkansas	0.0602106	na	0.0446875	0.194409	0.0416646	0.0367458	0.953567	0.0104083	na	<0.0001*
	Arkansas Territory	0.299507	na	0.328934	0.239008	0.334626	0.96608	0.226289	0.601672	na	na
	California	0.0058*, 0.0418*	Modoc County, San Francisco County	<0.0001*	0.175104	<0.0001*	<0.0001*	0.285432	<0.0001*	0.4368	0.0411
	Colorado	0.096572	na	0.993406	0.293684	0.784911	0.821828	0.163436	0.0757202	0.8048	0.0166
	Connecticut	0.106794	na	0.464121	0.0965533	0.327757	0.902401	0.0227736	0.0802366	1	1
	Dakota Territory	0.324858	na	0.13654	0.235901	0.308635	0.663974	0.894988	0.212101	na	na
	District Of Columbia	0.175529	na	0.244396	0.993562	0.295684	0.919802	0.30224	0.488055	na	na
	Florida	0.0001*	Miami-Dade County	0.00467473	0.654411	0.00185776	0.129284	0.881312	<0.0001*	0.9678	0.9742
	Florida Territory	0.987368	na	0.998887	0.286125	0.982328	0.583853	0.368004	0.889172		na
	Georgia	0.589384	na	0.145196	0.433766	0.060139	0.984668	0.0731444	0.00323066	<0.0001*	<0.0001*
	Hawaii	0.437553	na	0.901587	0.652159	0.699807	0.659299	0.29521	0.208686	na	na
	Hawaii Territory	1	na	0.426007	0.523561	0.452811	0.861097	0.400758	0.511133	na	na
	Idaho	0.868808	na	0.356959	0.0458852	0.956014	0.690804	0.247164	0.826408	0.1833	0.3234
	Idaho Territory	0.837525	na	0.0382887	0.474932	0.282738	0.640555	0.810333	0.593989	na	na
	Illinois	0.0039*	Cook County	0.793114	0.492792	0.289657	0.417106	0.0963793	0.0005*	0.0007*	<0.0001*
	Indiana	0.110007	na	0.232892	0.0265398	0.427511	0.147929	0.147382	0.212342	na	0.5772
	Iowa	0.0218*	Jefferson County	0.012054	0.389082	0.00212962	0.0174056	0.728232	0.0007*	0.361	<0.0001*
	Kansas	0.148594	na	0.24086	0.255128	0.774694	0.154853	0.265328	0.200699	<0.0001*	<0.0001*
	Kentucky	0.158336	na	0.0461493	0.927397	0.0394938	0.0778142	0.59766	0.00458069	0.7545	0.6185
	Louisiana	0.133584	na	0.405354	0.9874	0.186452	0.422021	0.424444	0.0335468	0.8655	0.0029
	Maine	0.0410*	Lincoln County	0.210728	0.140345	0.0901151	0.191158	0.967661	0.317389	na	0.611
	Maryland	0.112857	na	0.696485	0.0196765	0.631362	0.386911	0.655374	0.765008	na	0.043
	Massachusetts	0.0109*	Massachusetts (non-ME part) [multi-county reporting area]	0.0327061	0.219977	0.0183444	0.0595406	0.821123	0.0158619	0.414	<0.0001*
	Michigan	0.0045*	Dickinson County	0.0130659	0.167594	0.00808582	0.0006*	0.566718	0.0007*	0.0288	<0.0001*
	Michigan Territory	0.737564	na	0.460596	0.570619	0.579277	0.594802	0.707955	0.565371	na	na
	Minnesota	1	na	0.332673	0.723007	0.216463	0.681007	0.688857	0.00651223	<0.0001*	0.0008
	Mississippi	0.227477	na	0.00983824	0.512193	0.012059	0.236607	0.993025	0.00773331	1	0.001
	Missouri	0.461595	na	0.896793	0.201433	0.658747	0.873711	0.666681	0.00271025	0.2605	0.7522
	Montana	0.308208	na	0.0008*	0.805214	0.0020251	0.431537	0.314007	0.00496291	0.3433	0.9963
	Montana Territory	0.0023*	Missoula County	0.000796566	0.502575	0.00688925	0.0272486	0.018678	0.0004*	na	na
	Nebraska	0.0132*, 0.0490*	Sarpy County, Unorganized Territory	0.00361459	0.732978	0.0757804	<0.0001*	0.0413704	<0.0001*	0.0322	0.5549
	Nevada	1	na	0.0947141	0.67838	0.576526	0.277662	0.89428	0.822421	0.1367	0.8738
	New Hampshire	0.594061	na	0.766083	0.62898	0.732696	0.537915	0.289761	0.318205	1	1
	New Jersey	0.409442	na	0.257784	0.360723	0.969411	0.331999	0.734823	0.585869	1	1
	New Mexico	0.0636051	na	0.13364	0.979432	0.0410192	0.406241	0.374179	0.0739356	0.9769	0.5968
	New Mexico Territory	0.478453	na	0.0557767	0.488107	0.488674	0.274752	0.484647	0.0690529	na	na
	New York	0.0031*, 0.0117*	Bronx County, Hamilton County	0.236754	0.9723	0.780905	0.0846586	0.675562	0.0004*	0.3736	0.1277
	North Carolina	0.09667	na	0.0314892	0.00655382	0.624994	0.0682407	0.164014	0.234915	0.9367	0.7332
	North Dakota	0.0094*	Sioux County	0.00217679	0.23603	0.0004*	0.00215931	0.730143	0.0002*	0.0009	0.0748
	Ohio	0.0111*	Harrison County	0.0260111	0.012833	0.380097	0.00169249	0.713546	0.029359	1	0.1466
	Oklahoma	1	na	0.542645	0.340607	0.954418	0.682949	0.748785	0.990237	0.761	0.3012
	Oklahoma Territory	0.678012	na	0.517198	0.538713	0.642574	0.690235	0.899597	0.982606	na	na
	Oregon	0.299312	na	0.578368	0.159006	0.685093	0.673497	0.87777	0.418071	<0.0001*	<0.0001*
	Pennsylvania	0.0823948	na	0.00345874	0.0026515	0.113885	0.0004*	0.670236	0.00148761	na	0.4986
	Rhode Island	0.732471	na	0.355431	0.709966	0.428617	0.86525	0.763086	0.521316	na	na
	South Carolina	0.184317	na	0.0278933	0.197097	0.0376135	0.807678	0.430262	0.100136	na	0.729
	South Dakota	<0.0001*	Pine Ridge Indian Reservation	<0.0001*	0.869226	<0.0001*	<0.0001*	0.00138696	<0.0001*	0.3909	0.3161
	Tennessee	0.0163*	James County	0.0140761	0.00388647	0.00354975	0.0111622	0.119397	0.000860411	<0.0001*	<0.0001*
	Texas	0.144877	na	0.00199048	0.204697	0.00089776	0.259335	0.0431692	0.00164805	<0.0001*	<0.0001*
	Utah	1	na	0.217002	0.127395	0.96728	0.184486	0.923147	0.363268	0.5543	0.275
	Utah Territory	0.0001*	Morgan County	0.0001*	0.0623952	<0.0001*	<0.0001*	0.501276	<0.0001*	na	na
	Vermont	0.0415*	Chittenden County	0.697399	0.194845	0.582101	0.535782	0.931128	0.0703272	na	na
	Virginia	<0.0001*	Barbour County	<0.0001*	0.017061	<0.0001*	<0.0001*	0.049976	<0.0001*	0.5227	0.0188
	Washington	0.0202*	Grays Harbor County	0.111382	0.53717	0.0376151	0.0429364	0.4671	0.051134	0.0023	0.8983
	Washington Territory	1	na	0.960869	0.922061	0.981427	0.497385	0.224269	0.689863	na	na
	West Virginia	0.0812911	na	0.0428961	0.434299	0.0482537	0.395504	0.510173	0.152101	1	0.5888
	Wisconsin	0.167758	na	0.00938276	0.738555	0.00595293	0.363323	0.695881	0.0320338	0.0367	<0.0001*
	Wyoming	0.649282	na	0.548838	0.594865	0.417595	0.835094	0.571405	0.906151	0.2201	0.8263
	Wyoming Territory	0.12492	na	0.0513014	0.33679	0.318818	0.843748	0.478078	0.576719	na	na
density	Alabama	0.294782	na	0.942306	0.0216456	0.915984	0.651438	0.157034	0.498621	1	0.0829
	Alaska	0.191585	na	0.0987886	0.438631	0.226607	0.224736	0.852455	0.50242	na	na
	Alaska Territory	0.741528	na	0.991218	0.725575	0.910524	0.603705	0.271725	0.208585	na	na
	Arizona	0.698949	na	0.623222	0.127285	0.468233	0.763408	0.765507	0.837878	0.8412	0.1262
	Arizona Territory	0.284091	na	0.045672	0.982026	0.122021	0.961053	0.999452	0.282983	na	na
	Arkansas	0.0368*	Logan County	0.0124157	0.174232	0.00594316	0.0125131	0.604178	0.00124338	1	0.0011
	Arkansas Territory	0.233338	na	0.192805	0.592127	0.233364	0.836348	0.937111	0.574182	na	na
	California	<0.0001*	Klamath County	<0.0001*	<0.0001*	<0.0001*	<0.0001*	0.0002*	<0.0001*	0.311	0.5409
	Colorado	0.07274	na	0.658947	0.496971	0.775138	0.303395	0.168976	0.0128417	0.4576	0.0153
	Connecticut	0.10492	na	0.211392	0.154822	0.198496	0.676443	0.0381482	0.181143	na	na
	Dakota Territory	0.0909662	na	0.00919182	0.974295	0.0836484	0.943655	0.351436	0.0452816	na	na
	District Of Columbia	0.759122	na	0.905936	0.798109	0.968768	0.79354	0.886564	0.67419	na	na
	Florida	<0.0001*	Miami-Dade County	<0.0001*	0.015478	<0.0001*	<0.0001*	0.190826	<0.0001*	0.0172	0.0843
	Florida Territory	0.253459	na	0.102764	0.585075	0.1303	0.898534	0.789989	0.443077	na
	Georgia	1	na	0.0122706	0.701677	0.0199302	0.792034	0.104842	0.00206593	0.0023	<0.0001*
	Hawaii	1	na	0.366308	0.888889	0.966189	0.819363	0.0958114	0.581345	na	na
	Hawaii Territory	0.681428	na	0.963316	0.602968	0.833607	0.72217	0.362673	0.225289	na	na
	Idaho	0.97082	na	0.715636	0.276153	0.774331	0.992608	0.00810284	0.107608	0.1672	0.4787
	Idaho Territory	1	na	0.676117	0.589931	0.793472	0.501789	0.648268	0.317949	na	na
	Illinois	0.260894	na	0.655058	0.519271	0.85549	0.561888	0.884034	0.0132379	0.4592	0.0897
	Indiana	0.0092*	Union County	0.00372322	0.0828864	0.00301187	0.0001*	0.03626	<0.0001*	na	0.4794
	Iowa	0.0353*	Jefferson County	0.0934083	0.0141546	0.0264947	0.0475107	0.758062	0.00160585	0.6733	<0.0001*
	Kansas	0.153128	na	0.135812	0.00145991	0.834373	0.176689	0.411373	0.614303	<0.0001*	0.0001*
	Kentucky	0.174288	na	0.0723247	0.742375	0.0149333	0.595189	0.620935	0.0797821	0.4957	0.2701
	Louisiana	0.205926	na	0.140364	0.512181	0.0613828	0.881315	0.49124	0.0291392	0.5605	0.1055
	Maine	0.180203	na	0.247819	0.400664	0.555793	0.810271	0.418124	0.444677	na	0.824
	Maryland	0.54058	na	0.558976	0.103746	0.966166	0.888577	0.501081	0.855029	na	0.9826
	Massachusetts	0.0376*	Franklin County	0.0327453	0.981238	0.0322666	0.134885	0.194048	0.0670838	0.9063	0.8186
	Michigan	0.0111*	Dickinson County	0.00840192	0.0894134	0.00547339	0.00275005	0.77807	0.000764781	0.5108	<0.0001*
	Michigan Territory	0.234328	na	0.208627	0.405893	0.290334	0.869138	0.161399	0.357756	na	na
	Minnesota	1	na	0.169325	0.58055	0.121188	0.493412	0.872546	0.143499	<0.0001*	<0.0001*
	Mississippi	0.172152	na	0.00888287	0.49327	0.0182293	0.0722066	0.867899	0.0599934	1	0.0976
	Missouri	0.262649	na	0.393219	0.935246	0.266706	0.24018	0.450543	0.0134831	0.8601	0.0068
	Montana	0.164216	na	0.0008*	0.048804	0.00340003	0.664399	0.407051	0.00140598	0.5217	0.9643
	Montana Territory	0.0043*	Missoula County	0.0333312	0.60154	0.0530506	0.191512	0.0798282	0.0684413	na	na
	Nebraska	0.0718145	na	0.20658	0.0945894	0.21616	0.424626	0.832787	0.620335	0.052	0.956
	Nevada	1	na	0.0716553	0.508948	0.457964	0.333958	0.365675	0.382021	0.9464	0.8239
	New Hampshire	0.363505	na	0.690379	0.465955	0.483599	0.942982	0.061511	0.393682	1	1
	New Jersey	0.63815	na	0.0461866	0.482025	0.288313	0.397314	0.156687	0.258465	na	na
	New Mexico	0.138625	na	0.121962	0.607087	0.0808633	0.658396	0.656258	0.22875	0.7126	0.5343
	New Mexico Territory	0.0058*	Sierra County	0.000496944	0.720476	0.000908329	0.00256765	0.175602	0.0001*	na	na
	New York	0.0311*, 0.0499*	Bronx County, Hamilton County	0.158831	0.642788	0.0715823	0.357698	0.265666	0.0003*	0.4415	0.0256
	North Carolina	0.105883	na	0.00981735	0.433667	0.0203685	0.269305	0.20015	0.0718093	0.8288	0.2299
	North Dakota	0.0334*	Sioux County	0.0002*	0.564474	0.0002*	0.0383196	0.147542	0.0003*	0.0043	0.1822
	Ohio	0.0088*	Harrison County	0.00738056	0.0316276	0.0711235	<0.0001*	0.784481	0.0005*	na	0.6857
	Oklahoma	0.877779	na	0.396775	0.381736	0.827248	0.395379	0.573174	0.843807	0.5697	0.0727
	Oklahoma Territory	0.31645	na	0.408467	0.508797	0.688186	0.433146	0.498566	0.14585	na	na
	Oregon	0.258486	na	0.0513428	0.324912	0.0390274	0.538707	0.900646	0.159074	0.0239	<0.0001*
	Pennsylvania	0.0573067	na	0.0005*	0.21405	0.00194652	0.0147887	0.771632	0.0024611	na	0.7279
	Rhode Island	0.61282	na	0.995617	0.965455	0.943041	0.684693	0.561911	0.542576	1	1
	South Carolina	0.278702	na	0.00719442	0.641079	0.0128825	0.54864	0.203469	0.0847295	na	0.6732
	South Dakota	<0.0001*	Pine Ridge Indian Reservation	<0.0001*	0.0164345	<0.0001*	<0.0001*	0.00106609	<0.0001*	0.544	0.9112
	Tennessee	0.0009*	James County	<0.0001*	0.142482	<0.0001*	<0.0001*	0.233074	<0.0001*	0.0039	0.0165
	Texas	0.16453	na	<0.0001*	0.944064	<0.0001*	0.0140157	0.212473	<0.0001*	<0.0001*	<0.0001*
	Utah	0.521216	na	0.486683	0.183793	0.67706	0.458612	0.596866	0.860107	0.1431	0.0703
	Utah Territory	0.0010*	Morgan County	0.0001*	0.375768	<0.0001*	<0.0001*	0.336274	<0.0001*	na	na
	Vermont	0.485525	na	0.867984	0.907106	0.715426	0.708791	0.179469	0.108545	na	na
	Virginia	0.0102*	Bedford city	0.0001*	0.00350633	<0.0001*	0.0003*	0.536212	<0.0001*	0.7407	0.2789
	Washington	0.0582684	na	0.00813238	0.402101	0.00421449	0.097432	0.419526	0.0172043	0.0156	0.9974
	Washington Territory	0.815568	na	0.614226	0.708478	0.765764	0.432011	0.964143	0.829641	na	na
	West Virginia	0.135693	na	0.0822225	0.640281	0.0505379	0.738322	0.229749	0.0383208	na	0.6326
	Wisconsin	0.223115	na	0.0006*	0.656686	0.00387161	0.894724	0.730911	0.00793309	0.1487	0.0012
	Wyoming	0.225824	na	0.0178648	0.292021	0.0322616	0.41446	0.421476	0.129559	0.4317	0.5806
	Wyoming Territory	1	na	0.62992	0.341068	0.993978	0.500454	0.739086	0.297765	na	na
