# Supplementary material for: Analyzing and interpreting spatial and temporal variability of the United States county population distributions using Taylor's law
Source: PLoS One. 2019 Dec 11;14(12):e0226096. doi: 10.1371/journal.pone.0226096 (PMC6905577; doi:10.1371/journal.pone.0226096)
Supplement: S15 Table — (XLSX) [file pone.0226096.s067.xlsx]

## Sheet: sheet1
Table S15. Ordinary least-squares (ols) linear regression statistics of the spatial hierarchical TL with the minimum number of sampling units requirement (n ≥ 15), using count and density separately. "est_X_ols," "err_X_ols" and "p_X_ols" denote the point estimate, standard error and p-value of the corresponding regression coefficient ("int" = intercept, "slp" = slope) from ols. "adjr2" denotes t…
measure	year	N	est_slp_ols	err_slp_ols	p_slp_ols	est_int_ols	err_int_ols	p_int_ols	adjr2
count	1790	7	3.27447	1.14987	0.0359213	-5.50751	4.90684	0.312674	0.542309
	1800	10	2.80548	0.276413	<0.0001*	-3.67273	1.13382	0.011891	0.91893
	1810	12	2.41094	0.316779	<0.0001*	-1.95483	1.29107	0.160944	0.838054
	1820	16	1.90933	0.211151	<0.0001*	0.0741073	0.832802	0.930354	0.84337
	1830	19	2.02005	0.131555	<0.0001*	-0.37543	0.513116	0.474337	0.928791
	1840	22	1.97597	0.179491	<0.0001*	-0.174433	0.71149	0.808826	0.851267
	1850	24	2.09126	0.231628	<0.0001*	-0.56701	0.936398	0.551028	0.777809
	1860	31	1.84632	0.155021	<0.0001*	0.489068	0.622125	0.438171	0.824409
	1870	35	2.00708	0.139696	<0.0001*	-0.068152	0.564593	0.904653	0.857992
	1880	35	2.0876	0.182632	<0.0001*	-0.430963	0.762779	0.575901	0.792251
	1890	38	2.1836	0.21239	<0.0001*	-0.750431	0.899498	0.409627	0.738886
	1900	39	2.57273	0.242475	<0.0001*	-2.45719	1.04957	0.0247218	0.745952
	1910	41	2.77425	0.236252	<0.0001*	-3.32953	1.03802	0.00267475	0.773874
	1920	41	2.69287	0.206616	<0.0001*	-2.88409	0.914969	0.0031124	0.808489
	1930	41	2.59967	0.187004	<0.0001*	-2.39359	0.837842	0.0068273	0.827776
	1940	41	2.53126	0.179919	<0.0001*	-2.0755	0.812045	0.0146022	0.831177
	1950	41	2.37666	0.162688	<0.0001*	-1.30355	0.743474	0.0874028	0.841531
	1960	42	2.1901	0.143657	<0.0001*	-0.387444	0.664154	0.562923	0.849497
	1970	42	2.08825	0.138022	<0.0001*	0.104218	0.644688	0.87239	0.847534
	1980	42	2.01215	0.139611	<0.0001*	0.420708	0.66104	0.528119	0.834492
	1990	43	1.98069	0.130859	<0.0001*	0.583077	0.625948	0.357043	0.844503
	2000	43	1.96014	0.127791	<0.0001*	0.684544	0.618616	0.274929	0.847977
	2010	44	1.92755	0.125059	<0.0001*	0.842307	0.610023	0.174651	0.84619
density	1790	7	3.50924	0.288871	0.0001*	-1.52468	0.332387	0.00590939	0.960676
	1800	10	3.52013	0.255186	<0.0001*	-1.31286	0.28894	0.00188995	0.954611
	1810	12	3.22076	0.277512	<0.0001*	-0.949535	0.318066	0.0136822	0.923978
	1820	16	2.87649	0.226424	<0.0001*	-0.565267	0.229083	0.0271137	0.914477
	1830	19	2.60354	0.194921	<0.0001*	-0.301238	0.194838	0.140493	0.907884
	1840	22	2.39252	0.231013	<0.0001*	-0.380831	0.21692	0.0944572	0.834983
	1850	24	2.4178	0.229942	<0.0001*	-0.382068	0.232273	0.114202	0.826496
	1860	31	2.3186	0.177021	<0.0001*	-0.157517	0.195596	0.42719	0.850415
	1870	34	2.23302	0.177608	<0.0001*	-0.0123678	0.192692	0.949223	0.826384
	1880	35	2.40985	0.186581	<0.0001*	-0.180619	0.22823	0.434368	0.829845
	1890	37	2.44825	0.179407	<0.0001*	-0.141412	0.225992	0.535544	0.837268
	1900	39	2.50234	0.157131	<0.0001*	-0.265204	0.210502	0.215608	0.869241
	1910	41	2.49817	0.159696	<0.0001*	-0.213746	0.220649	0.338655	0.859012
	1920	41	2.48665	0.151422	<0.0001*	-0.156337	0.215842	0.473197	0.870416
	1930	41	2.4305	0.1404	<0.0001*	-0.0311982	0.206295	0.880573	0.881894
	1940	41	2.39832	0.137651	<0.0001*	0.0127179	0.205083	0.950869	0.883235
	1950	41	2.35826	0.127873	<0.0001*	0.118964	0.195917	0.547227	0.894491
	1960	42	2.2287	0.114407	<0.0001*	0.353632	0.177919	0.0537316	0.902263
	1970	42	2.19081	0.107298	<0.0001*	0.405509	0.170126	0.0219811	0.910264
	1980	42	2.15807	0.10824	<0.0001*	0.402249	0.175425	0.0271836	0.90629
	1990	43	2.12306	0.101358	<0.0001*	0.446402	0.165182	0.00996702	0.912452
	2000	43	2.08963	0.0994267	<0.0001*	0.483707	0.166566	0.00590999	0.91299
	2010	44	2.00757	0.0945675	<0.0001*	0.59475	0.164279	0.0008*	0.91272
