# Supplementary material for: Analyzing and interpreting spatial and temporal variability of the United States county population distributions using Taylor's law
Source: PLoS One. 2019 Dec 11;14(12):e0226096. doi: 10.1371/journal.pone.0226096 (PMC6905577; doi:10.1371/journal.pone.0226096)
Supplement: S16 Table — (XLSX) [file pone.0226096.s068.xlsx]

## Sheet: sheet1
Table S16. Ordinary least-squares quadratic regression statistics of the spatial hierarchical quadratic Taylor's law (QTL) with the minimum number of sampling units requirement (n ≥ 15), using count and density separately. Columns are defined in Table S15. "qua" = quadratic coefficient
measure	year	est_qua_ols	err_qua_ols	p_qua_ols	est_slp_ols	err_slp_ols	p_slp_ols	est_int_ols	err_int_ols	p_int_ols	adjr2
count	1790	-1.29801	3.88022	0.754793	14.438	33.3959	0.68779	-29.4317	71.7226	0.702574	0.443456
	1800	1.31196	0.692808	0.100132	-8.24467	5.84023	0.200908	19.4603	12.2556	0.156339	0.938734
	1810	1.88936	0.559351	0.00815568	-13.4027	4.68692	0.0187927	30.9185	9.77409	0.0114889	0.920651
	1820	1.37945	0.685015	0.065212	-9.03041	5.43586	0.120573	21.658	10.7447	0.0649871	0.871428
	1830	0.317015	0.304725	0.313652	-0.413362	2.34275	0.86216	4.24823	4.47378	0.356448	0.929135
	1840	0.676239	0.375508	0.0876192	-3.29277	2.93061	0.275189	9.99393	5.68653	0.094939	0.866266
	1850	1.11726	0.535522	0.0493324	-6.94492	4.33658	0.124208	17.5834	8.74342	0.0573337	0.807191
	1860	0.370636	0.242676	0.137908	-0.990403	1.86354	0.599289	5.82738	3.54783	0.111667	0.832123
	1870	0.434108	0.233774	0.0725429	-1.39504	1.83704	0.453175	6.50689	3.58242	0.0786971	0.8678
	1880	0.794985	0.301313	0.0127569	-4.43885	2.47934	0.0828663	12.8535	5.08375	0.016591	0.824037
	1890	0.634122	0.427009	0.146487	-3.16656	3.60877	0.386219	10.4575	7.59892	0.177509	0.747345
	1900	0.700688	0.645407	0.284849	-3.62468	5.71359	0.529833	11.178	12.603	0.381003	0.747173
	1910	0.120456	0.541794	0.825249	1.69351	4.86693	0.729789	-0.917258	10.9008	0.933382	0.768224
	1920	-0.0802587	0.430609	0.853135	3.41401	3.87473	0.383805	-4.49494	8.69215	0.608065	0.803629
	1930	-0.214706	0.387939	0.583195	4.55463	3.53733	0.205675	-6.81644	8.03596	0.401615	0.824657
	1940	-0.213648	0.384735	0.581936	4.48953	3.53112	0.211306	-6.53587	8.07389	0.423264	0.828129
	1950	-0.317911	0.358762	0.381119	5.33217	3.33927	0.118593	-8.12997	7.73959	0.300151	0.840653
	1960	-0.350241	0.303812	0.256002	5.48787	2.86419	0.0627127	-8.09769	6.7208	0.235514	0.850725
	1970	-0.357046	0.276856	0.20477	5.48057	2.63399	0.044076	-7.89685	6.23695	0.212974	0.85002
	1980	-0.30754	0.28468	0.286644	4.96475	2.73668	0.0773531	-6.62176	6.55229	0.318436	0.835181
	1990	-0.236165	0.261667	0.372175	4.26428	2.53358	0.100146	-4.90027	6.10779	0.427121	0.843796
	2000	-0.13051	0.25261	0.608247	3.23319	2.46742	0.197552	-2.3989	6.00073	0.691454	0.84521
	2010	-0.0192912	0.245952	0.937864	2.11718	2.42094	0.386924	0.379435	5.93357	0.949323	0.842462
density	1790	0.105144	0.939607	0.916292	3.28203	2.05594	0.185643	-1.41869	1.01725	0.235591	0.950998
	1800	-1.09281	1.02722	0.322709	5.93216	2.28134	0.0354096	-2.43036	1.08882	0.0607817	0.955346
	1810	0.556497	0.813157	0.510981	1.94913	1.87988	0.326865	-0.368783	0.909378	0.694557	0.919709
	1820	0.827108	0.310768	0.0195787	1.18445	0.663258	0.0974642	0.01903	0.291169	0.948884	0.940383
	1830	0.5006	0.184676	0.0154302	1.82499	0.331898	<0.0001*	-0.2214	0.168844	0.208273	0.932929
	1840	0.829292	0.234182	0.0022	1.05422	0.420314	0.0213688	-0.0656172	0.194322	0.739312	0.895361
	1850	0.752735	0.221906	0.00274837	1.01833	0.453866	0.035763	0.0573186	0.230849	0.806318	0.882574
	1860	0.439325	0.139159	0.00379553	1.51148	0.298827	<0.0001*	0.00731458	0.178741	0.967648	0.885743
	1870	0.527839	0.162551	0.00279834	1.24915	0.340735	0.0009*	0.254101	0.187972	0.186221	0.866271
	1880	0.518225	0.180927	0.00732137	1.16392	0.46668	0.0179875	0.369115	0.28212	0.20007	0.860335
	1890	0.447196	0.190109	0.0245859	1.4023	0.475614	0.00574011	0.29761	0.282927	0.300267	0.855929
	1900	0.297742	0.170495	0.0892816	1.70546	0.48127	0.0011*	0.135787	0.30775	0.661689	0.876104
	1910	0.195049	0.166556	0.248862	1.97822	0.471589	0.0002*	0.0492508	0.314105	0.876235	0.860342
	1920	0.111801	0.149477	0.459094	2.17658	0.441648	<0.0001*	0.00908828	0.309897	0.976757	0.868935
	1930	0.048969	0.137331	0.723381	2.29283	0.411364	<0.0001*	0.0436236	0.295909	0.883578	0.879191
	1940	0.0542104	0.138863	0.69843	2.24172	0.424587	<0.0001*	0.10219	0.309064	0.742731	0.880641
	1950	0.00918507	0.131924	0.944858	2.3308	0.415163	<0.0001*	0.13562	0.310844	0.66509	0.891729
	1960	0.0366311	0.117485	0.756858	2.121	0.364303	<0.0001*	0.417007	0.271477	0.132597	0.900006
	1970	-0.0204172	0.113555	0.858241	2.25274	0.361162	<0.0001*	0.367006	0.274807	0.189453	0.90804
	1980	-0.0302793	0.120753	0.803321	2.25276	0.393172	<0.0001*	0.339312	0.307421	0.276471	0.904042
	1990	-0.0196612	0.113376	0.863199	2.18507	0.372023	<0.0001*	0.404545	0.293607	0.175911	0.910331
	2000	0.00176104	0.109915	0.987297	2.08397	0.366964	<0.0001*	0.487632	0.297408	0.10893	0.910816
	2010	-0.00661593	0.106179	0.950619	2.02939	0.363077	<0.0001*	0.579131	0.3008	0.0611476	0.9106
