# Supplementary material for: Analyzing and interpreting spatial and temporal variability of the United States county population distributions using Taylor's law
Source: PLoS One. 2019 Dec 11;14(12):e0226096. doi: 10.1371/journal.pone.0226096 (PMC6905577; doi:10.1371/journal.pone.0226096)
Supplement: S17 Table — (XLSX) [file pone.0226096.s069.xlsx]

## Sheet: sheet1
Table S17. Ordinary least-squares linear regression statistics of the spatial TL with the minimum number of sampling units requirement (n ≥ 15), using count and density separately. Columns are defined in Table S15
measure	state	N	est_slp_ols	err_slp_ols	p_slp_ols	est_int_ols	err_int_ols	p_int_ols	adjr2
count	Alabama	20	3.13934	0.17374	<0.0001*	-5.13207	0.775012	<0.0001*	0.944847
	Alaska	6	2.17839	0.162364	0.0002*	-0.0959519	0.685959	0.895516	0.972827
	Arkansas	18	2.83884	0.21652	<0.0001*	-3.76417	0.917804	0.0008*	0.909528
	California	17	2.25856	0.062546	<0.0001*	-0.571073	0.30889	0.0842955	0.987869
	Colorado	14	2.10227	0.129125	<0.0001*	0.218301	0.562719	0.704854	0.95308
	Florida	17	2.42675	0.0706388	<0.0001*	-1.70459	0.317348	<0.0001*	0.986613
	Georgia	22	3.51858	0.157071	<0.0001*	-6.33864	0.660938	<0.0001*	0.959756
	Idaho	13	3.26353	0.239122	<0.0001*	-5.21634	0.994639	0.0003*	0.939169
	Illinois	20	3.16221	0.112238	<0.0001*	-4.46338	0.51708	<0.0001*	0.976595
	Indiana	20	3.00501	0.187824	<0.0001*	-4.4226	0.831598	<0.0001*	0.93065
	Iowa	17	2.30543	0.339447	<0.0001*	-1.34396	1.46222	0.372576	0.738252
	Kansas	15	3.66432	0.406377	<0.0001*	-6.72515	1.71919	0.00178586	0.851549
	Kentucky	22	3.69086	0.118153	<0.0001*	-6.95772	0.498311	<0.0001*	0.978912
	Louisiana	20	2.0403	0.0670279	<0.0001*	0.213735	0.29639	0.480093	0.979885
	Maine	16	3.61974	0.155742	<0.0001*	-8.01297	0.737071	<0.0001*	0.972933
	Maryland	23	2.64819	0.232205	<0.0001*	-2.85128	1.10375	0.0173396	0.854366
	Michigan	18	2.84284	0.134589	<0.0001*	-3.30687	0.624113	<0.0001*	0.963216
	Minnesota	16	2.5946	0.090873	<0.0001*	-2.03952	0.400238	0.0002*	0.981911
	Mississippi	20	2.39178	0.229124	<0.0001*	-1.97282	0.976119	0.0583997	0.850357
	Missouri	19	3.02532	0.125003	<0.0001*	-3.84512	0.546743	<0.0001*	0.970136
	Montana	13	3.81514	0.459725	<0.0001*	-7.23921	1.8729	0.00262943	0.849755
	Nebraska	15	2.70983	0.291193	<0.0001*	-2.3088	1.19417	0.075263	0.859439
	Nevada	14	2.67001	0.0695334	<0.0001*	-2.40535	0.290524	<0.0001*	0.991255
	New Jersey	18	2.10248	0.140304	<0.0001*	-0.702244	0.718857	0.343164	0.92933
	New Mexico	10	3.63327	0.217749	<0.0001*	-7.09268	0.971997	<0.0001*	0.968576
	New York	23	2.70713	0.114173	<0.0001*	-3.17483	0.573895	<0.0001*	0.962277
	North Carolina	23	3.09746	0.0490694	<0.0001*	-5.14626	0.213932	<0.0001*	0.994508
	North Dakota	13	1.6806	0.713634	0.0381499	1.31201	2.87582	0.657106	0.274748
	Ohio	21	2.87403	0.0833852	<0.0001*	-3.87568	0.39095	<0.0001*	0.983429
	Oklahoma	11	5.53581	0.804965	<0.0001*	-15.6554	3.64104	0.00199148	0.822362
	Oregon	16	2.46013	0.125445	<0.0001*	-1.70897	0.555306	0.00818982	0.962369
	Pennsylvania	23	2.56673	0.101146	<0.0001*	-2.42194	0.493548	<0.0001*	0.966915
	South Carolina	23	2.35375	0.220047	<0.0001*	-1.88424	0.996265	0.0724589	0.837538
	South Dakota	13	3.29943	0.777988	0.00138659	-5.06443	3.08418	0.128828	0.586006
	Tennessee	22	3.48877	0.0975944	<0.0001*	-6.3797	0.423649	<0.0001*	0.98382
	Texas	17	3.06878	0.0741197	<0.0001*	-4.0852	0.320786	<0.0001*	0.990747
	Utah	12	2.30585	0.0796741	<0.0001*	-0.711015	0.356885	0.0743376	0.987022
	Virginia	23	3.55417	0.252583	<0.0001*	-6.64289	1.0822	<0.0001*	0.899543
	Washington	13	2.29515	0.053081	<0.0001*	-0.841864	0.252132	0.00660533	0.993619
	West Virginia	15	2.94564	0.160239	<0.0001*	-4.30347	0.704467	<0.0001*	0.960106
	Wisconsin	17	2.97002	0.139583	<0.0001*	-4.06742	0.637768	<0.0001*	0.965793
	Wyoming	11	2.77873	0.228924	<0.0001*	-3.3909	0.950345	0.00604243	0.936035
density	Alabama	20	2.55133	0.201948	<0.0001*	-0.818459	0.235374	0.00268905	0.893022
	Alaska	6	2.01565	0.141966	0.0001*	1.12455	0.0529642	<0.0001*	0.975679
	Arkansas	18	2.57578	0.206626	<0.0001*	-0.822911	0.206211	0.0011*	0.900816
	California	17	2.20108	0.124574	<0.0001*	1.01618	0.241255	0.0008*	0.951099
	Colorado	14	2.84189	0.130993	<0.0001*	0.204372	0.184867	0.290612	0.973066
	Florida	17	2.33961	0.0694839	<0.0001*	-0.108194	0.0878702	0.237171	0.986072
	Georgia	22	3.04376	0.108483	<0.0001*	-1.08648	0.137022	<0.0001*	0.973985
	Idaho	13	2.45997	0.113301	<0.0001*	-0.00575139	0.080616	0.944405	0.975125
	Illinois	20	3.07328	0.155652	<0.0001*	-0.858093	0.22362	0.00120685	0.953414
	Indiana	20	2.85132	0.184793	<0.0001*	-1.17826	0.26793	0.0003*	0.925804
	Iowa	17	2.16145	0.382096	<0.0001*	-0.245505	0.440539	0.585555	0.659573
	Kansas	15	3.52241	0.16263	<0.0001*	-0.818522	0.174653	0.0004*	0.970961
	Kentucky	22	2.92735	0.136836	<0.0001*	-0.976788	0.177447	<0.0001*	0.956036
	Louisiana	20	2.11757	0.130088	<0.0001*	0.81058	0.179331	0.0003*	0.932856
	Maine	16	2.7477	0.126946	<0.0001*	-1.05013	0.166949	<0.0001*	0.968911
	Maryland	23	2.67554	0.155871	<0.0001*	-0.507365	0.342187	0.153003	0.9303
	Michigan	18	2.8456	0.139477	<0.0001*	-0.570573	0.202279	0.0123038	0.96067
	Minnesota	16	2.56159	0.0890349	<0.0001*	0.274039	0.116455	0.033759	0.98218
	Mississippi	20	1.87219	0.251791	<0.0001*	-0.263809	0.271819	0.344642	0.740744
	Missouri	19	3.15257	0.0989563	<0.0001*	-0.36376	0.148	0.0250107	0.982557
	Montana	13	1.60035	0.344166	0.0007*	0.682774	0.112043	<0.0001*	0.632148
	Nebraska	15	3.01304	0.219665	<0.0001*	-0.0580281	0.215999	0.792416	0.930398
	Nevada	12	2.15155	0.041285	<0.0001*	0.584446	0.0279456	<0.0001*	0.995965
	New Jersey	18	2.23909	0.136769	<0.0001*	-0.113992	0.345173	0.745499	0.940145
	New Mexico	10	2.79926	0.0910158	<0.0001*	0.096939	0.073442	0.223372	0.990565
	New York	23	1.87454	0.0727795	<0.0001*	1.64839	0.189148	<0.0001*	0.967855
	North Carolina	23	2.82816	0.0861592	<0.0001*	-1.40022	0.10899	<0.0001*	0.979972
	North Dakota	13	0.910363	0.856193	0.310445	0.363993	0.420555	0.405242	0.0107613
	Ohio	21	2.6399	0.0905829	<0.0001*	-0.749042	0.14815	<0.0001*	0.976968
	Oklahoma	11	5.11872	0.64352	<0.0001*	-3.3631	0.792003	0.00215411	0.86163
	Oregon	16	2.40948	0.111348	<0.0001*	0.47069	0.124169	0.00198685	0.968896
	Pennsylvania	23	2.18636	0.0708724	<0.0001*	0.788469	0.134289	<0.0001*	0.977382
	South Carolina	23	2.69872	0.136908	<0.0001*	-1.41519	0.167621	<0.0001*	0.946284
	South Dakota	13	3.24702	0.843112	0.00269376	-0.617174	0.525902	0.265358	0.53546
	Tennessee	22	2.98566	0.128253	<0.0001*	-1.29892	0.160543	<0.0001*	0.962629
	Texas	17	2.84206	0.0817519	<0.0001*	-0.338393	0.0837172	0.0011*	0.986923
	Utah	12	2.09903	0.047397	<0.0001*	0.799976	0.0511836	<0.0001*	0.99442
	Virginia	23	2.23482	0.151775	<0.0001*	0.173775	0.310847	0.58205	0.90749
	Washington	13	2.31271	0.0535656	<0.0001*	-0.00248674	0.0650264	0.97018	0.9936
	West Virginia	15	1.7309	0.0740685	<0.0001*	0.521908	0.107551	0.0003*	0.97496
	Wisconsin	17	2.91634	0.140572	<0.0001*	-0.426231	0.207864	0.058211	0.964078
	Wyoming	11	2.45638	0.175087	<0.0001*	-0.0724471	0.0393211	0.0985272	0.951415
