# Supplementary material for: Analyzing and interpreting spatial and temporal variability of the United States county population distributions using Taylor's law
Source: PLoS One. 2019 Dec 11;14(12):e0226096. doi: 10.1371/journal.pone.0226096 (PMC6905577; doi:10.1371/journal.pone.0226096)
Supplement: S18 Table — (XLSX) [file pone.0226096.s070.xlsx]

## Sheet: sheet1
Table S18. Ordinary least-squares quadratic regression statistics of the spatial QTL with the minimum number of sampling units requirement (n ≥ 15), using count and density separately. Columns are defined in Table S15
measure	state	N	est_qua_ols	err_qua_ols	p_qua_ols	est_slp_ols	err_slp_ols	p_slp_ols	est_int_ols	err_int_ols	p_int_ols	adjr2	aicc_ols	est_qua_ar1	err_qua_ar1	p_qua_ar1	est_slp_ar1	err_slp_ar1	p_slp_ar1	est_int_ar1	err_int_ar1	p_int_ar1	aicc_ar1	est_qua_ma1	err_qua_ma1	p_qua_ma1	est_slp_ma1	err_slp_ma1	p_slp_ma1	est_int_ma1	err_int_ma1	p_int_ma1	aicc_ma1	est_qua_arma11	err_qua_arma11	p_qua_arma11	est_slp_arma11	err_slp_arma11	p_slp_arma11	est_int_arma11	err_int_arma11	p_int_arma11	aicc_arma11
count	Alabama	20	1.58991	0.39381	0.0009*	-10.6888	3.42753	0.00625145	24.7693	7.42828	0.00392668	0.970187	-5.48685	1.20229	0.526819	0.0356315	-7.72853	4.45901	0.101152	19.2724	9.36343	0.0552318	-14.823	1.51624	0.421648	0.00222823	-10.0963	3.65211	0.0132586	23.5927	7.87322	0.00811362	-9.06089	1.19447	0.53171	0.0382496	-7.6664	4.50048	0.106691	19.1519	9.45071	0.0586976	-10.6642
	Alaska	6	0.542908	2.33534	0.831126	-2.35872	19.5174	0.911448	9.36709	40.7131	0.832829	0.964411	29.9566	0.838379	1.50539	0.616432	-4.87788	12.5944	0.724373	14.7317	26.3028	0.614525	Inf	0.718426	1.72283	0.704718	-3.84187	14.4219	0.807198	12.4965	30.1382	0.706271	Inf	1.04673	1.21041	0.450773	-6.63614	10.1398	0.559512	18.4352	21.2071	0.448649	-95.785
	Arkansas	18	1.87145	0.477284	0.00136156	-12.2551	3.8527	0.00620132	26.4057	7.72314	0.00380618	0.952343	3.53847	0.448849	0.606816	0.470914	-1.61842	4.70188	0.735468	7.01409	8.97212	0.446518	-2.94352	1.69832	0.512374	0.00471545	-10.8608	4.11603	0.0186082	23.6181	8.20486	0.0114832	2.17356	0.53631	0.575287	0.365972	-2.20636	4.46678	0.628498	7.93539	8.54667	0.36786	1.46866
	California	17	-0.28671	0.0791639	0.00277619	5.01267	0.761862	<0.0001*	-7.04673	1.8027	0.00157367	0.99329	-12.536	-0.331417	0.0638623	0.0001*	5.45926	0.616645	<0.0001*	-8.14321	1.46508	<0.0001*	-9.21137	-0.315968	0.0681629	0.0004*	5.30533	0.657726	<0.0001*	-7.76556	1.56148	0.0002*	-8.89395	-0.337235	0.0641568	0.0001*	5.51681	0.619144	<0.0001*	-8.28412	1.46987	<0.0001*	-4.69263
	Colorado	14	-0.964702	0.310276	0.00994002	10.5062	2.70473	0.0025441	-17.9738	5.86679	0.0107814	0.972756	-9.54543	-0.784988	0.178933	0.0011*	8.88327	1.56044	0.0001*	-14.3266	3.3878	0.0014151	-7.89035	-0.838217	0.140219	<0.0001*	9.35382	1.22291	<0.0001*	-15.3633	2.6574	0.0001*	-13.4415	-0.783507	0.103788	<0.0001*	8.86328	0.905372	<0.0001*	-14.2679	1.96823	<0.0001*	-8.46181
	Florida	17	-0.17031	0.130373	0.212496	3.95709	1.17351	0.00455991	-5.07465	2.59837	0.0711038	0.987216	-2.21563	-0.116018	0.176756	0.522227	3.33454	1.59247	0.054945	-3.39719	3.50696	0.349134	-14.5696	-0.140278	0.14297	0.343159	3.65885	1.28632	0.0129916	-4.35079	2.84374	0.148307	-7.83678	-0.0999227	0.189423	0.606098	3.19262	1.70524	0.0822112	-3.09125	3.75396	0.424051	-11.6141
	Georgia	22	-0.618974	0.558745	0.281778	8.78034	4.75233	0.0802931	-17.466	10.0661	0.0989095	0.960208	1.8767	0.466344	0.691051	0.507911	-1.6579	5.89674	0.78163	7.09992	12.5079	0.576929	-17.7133	-0.401821	0.615342	0.521577	6.84864	5.24112	0.206907	-13.2037	11.115	0.249504	-10.3466	0.675641	0.661711	0.320056	-3.834	5.50362	0.494469	12.53	11.3733	0.284352	-21.4389
	Idaho	13	0.765552	0.822343	0.373813	-3.06267	6.79975	0.662023	7.81155	14.0301	0.589925	0.938422	4.74471	1.45495	0.737696	0.0768522	-9.81543	5.97176	0.131279	23.8286	11.9982	0.0751164	0.487657	0.8552	0.875874	0.351897	-4.08444	7.21904	0.58401	10.5003	14.8406	0.49539	4.18074	1.36596	0.570659	0.0377221	-9.54129	4.698	0.0696965	24.1993	9.58957	0.0302055	-0.569215
	Illinois	20	0.399726	0.247423	0.124595	-0.295155	2.14274	0.892059	2.87851	4.57141	0.537278	0.978517	8.81986	0.977139	0.303455	0.00502595	-5.36561	2.53076	0.0490061	13.7081	5.14916	0.016419	-15.0808	0.490341	0.262602	0.0792095	-1.11102	2.26859	0.630577	4.68492	4.82375	0.345056	-5.63305	1.01776	0.306463	0.0040426	-5.79398	2.54963	0.0363253	14.812	5.18538	0.0109235	-20.2017
	Indiana	20	1.55477	0.393233	0.0010*	-10.2924	3.36607	0.00712131	23.7854	7.16106	0.0040383	0.961747	3.74812	1.47468	0.462156	0.00535172	-9.94281	3.85383	0.0194688	23.751	7.94452	0.00823507	-20.1497	1.5403	0.391519	0.0011*	-10.2079	3.33838	0.00712055	23.6944	7.06905	0.0037819	-13.0718	1.30155	0.521826	0.0232209	-8.4609	4.37354	0.0698636	20.645	9.0709	0.0360742	-23.4347
	Iowa	17	3.9788	1.01336	0.00152089	-30.1569	8.2714	0.00264615	64.4471	16.7889	0.00180744	0.866528	7.5885	-0.390273	0.827321	0.644386	4.55559	6.50243	0.495034	-3.65525	12.6467	0.776795	-7.36534	2.63967	1.01943	0.0214157	-19.1653	8.25531	0.035852	42.025	16.6056	0.0239952	1.8584	-1.2619	0.534964	0.0333949	11.2467	4.34417	0.0214341	-16.2544	8.77613	0.0852114	-11.7923
	Kansas	15	5.97779	0.766185	<0.0001*	-45.4976	6.30352	<0.0001*	94.1014	12.9435	<0.0001*	0.973517	-14.2192	4.43933	0.787946	0.0001*	-33.4068	6.31789	0.0002*	70.5113	12.6041	0.0001*	-21.475	5.41022	0.758837	<0.0001*	-40.8777	6.20417	<0.0001*	84.7274	12.6538	<0.0001*	-15.6706	3.63555	0.786478	0.0006*	-27.1089	6.27764	0.0010*	58.2809	12.458	0.0005*	-16.7775
	Kentucky	22	0.83129	0.536459	0.137737	-3.24511	4.47747	0.477428	7.46158	9.31771	0.43315	0.980292	-20.9935	1.20927	0.754315	0.125399	-6.89838	6.19932	0.279691	16.0995	12.688	0.21981	-27.5807	1.02374	0.583226	0.0953167	-4.93017	4.85391	0.322528	11.1343	10.0706	0.282693	-25.3626	1.1892	0.748721	0.128718	-6.68029	6.16314	0.291968	15.5475	12.6373	0.233605	-24.7186
	Louisiana	20	-0.732541	0.145341	0.0001*	8.42989	1.26849	<0.0001*	-13.6358	2.75462	0.0001*	0.991461	-44.9281	-0.738097	0.154756	0.0002*	8.47666	1.35006	<0.0001*	-13.7336	2.93022	0.0002*	-41.4456	-0.736439	0.153609	0.0002*	8.4623	1.34017	<0.0001*	-13.7027	2.90905	0.0002*	-41.4354	-0.741519	0.156244	0.0002*	8.50638	1.36281	<0.0001*	-13.7979	2.95732	0.0002*	-37.2845
	Maine	16	-6.08695	0.67501	<0.0001*	61.4475	6.41306	<0.0001*	-145.283	15.2252	<0.0001*	0.995982	-62.7703	-6.10416	0.65545	<0.0001*	61.6098	6.227	<0.0001*	-145.666	14.7829	<0.0001*	-58.4262	-6.13556	0.625205	<0.0001*	61.9063	5.93926	<0.0001*	-146.365	14.0989	<0.0001*	-58.452	-6.41323	0.415904	<0.0001*	64.5331	3.94613	<0.0001*	-152.575	9.35689	<0.0001*	-56.9198
	Maryland	23	-3.2212	0.203536	<0.0001*	33.5324	1.95253	<0.0001*	-76.416	4.65845	<0.0001*	0.988693	-26.6552	-3.10821	0.304303	<0.0001*	32.4892	2.9223	<0.0001*	-74.0235	6.97521	<0.0001*	-29.6582	-3.17841	0.249084	<0.0001*	33.1379	2.39015	<0.0001*	-75.5123	5.703	<0.0001*	-28.0121	-3.10301	0.307794	<0.0001*	32.4432	2.95638	<0.0001*	-73.9229	7.05734	<0.0001*	-25.9844
	Michigan	18	-0.283859	0.396976	0.485557	5.41065	3.59368	0.152935	-9.06584	8.07881	0.27943	0.962057	6.31627	0.136767	0.47415	0.776953	1.47058	4.20499	0.731408	0.0398002	9.22989	0.996616	-10.1123	-0.1177	0.384658	0.763821	3.84329	3.4621	0.284435	-5.39744	7.73206	0.495819	-7.63326	0.169982	0.477807	0.726978	1.09247	4.2299	0.799706	1.09458	9.26817	0.907554	-16.4366
	Minnesota	16	0.512185	0.185507	0.0161937	-1.66192	1.54347	0.301173	6.709	3.18571	0.0552115	0.98772	-17.4499	0.557979	0.2186	0.024078	-2.0906	1.79091	0.264038	7.69484	3.62963	0.0538196	-16.061	0.516823	0.198624	0.0219221	-1.71524	1.64412	0.315842	6.85164	3.37312	0.0631951	-14.6508	0.592502	0.219016	0.0180111	-2.39361	1.78323	0.202474	8.34572	3.58694	0.0367883	-11.3782
	Mississippi	20	2.80618	0.652611	0.0005*	-20.7401	5.38207	0.00127383	45.4549	11.0518	0.0007*	0.924102	-1.80851	0.356409	0.792023	0.658397	-1.02425	6.40501	0.874833	6.16957	12.8474	0.637192	-20.8199	2.4434	0.683428	0.00233096	-17.7334	5.62216	0.00579046	39.2534	11.5115	0.00333525	-12.4299	0.251632	0.831669	0.765894	-0.242367	6.77546	0.971881	4.74111	13.7025	0.733586	-20.1986
	Missouri	19	-1.11624	0.376562	0.00913458	12.4099	3.16756	0.00122688	-23.4317	6.62299	0.00273536	0.979518	-12.7599	-1.0963	0.430753	0.0216174	12.2306	3.61531	0.00379373	-23.0335	7.53943	0.0075581	-10.032	-1.07145	0.413342	0.0196509	12.0229	3.47203	0.00320586	-22.6013	7.24769	0.00661948	-9.88223	-1.09513	0.430604	0.0216981	12.2207	3.6141	0.00380663	-23.0128	7.53703	0.00758627	-5.64746
	Montana	13	-1.58385	5.02024	0.758873	16.7509	41.0046	0.691508	-33.6376	83.6964	0.696213	0.836359	-0.821459	-3.48868	4.32106	0.438237	30.2978	35.1294	0.408639	-57.1732	71.3158	0.441366	-1.98954	-2.31499	5.24023	0.668054	22.4746	42.7875	0.610849	-44.8163	87.3044	0.618868	3.15259	-2.82473	4.23804	0.520161	25.0165	34.4491	0.484374	-46.691	69.9283	0.519438	5.40025
	Nebraska	15	3.61532	0.454664	<0.0001*	-24.9269	3.47771	<0.0001*	50.0491	6.60323	<0.0001*	0.97571	-15.7014	3.26728	0.401124	<0.0001*	-22.3024	3.00001	<0.0001*	45.1525	5.54532	<0.0001*	-19.9685	3.70775	0.324447	<0.0001*	-25.6303	2.43536	<0.0001*	51.3754	4.52576	<0.0001*	-21.2359	3.72125	0.317876	<0.0001*	-25.729	2.37777	<0.0001*	51.5524	4.40169	<0.0001*	-15.6614
	Nevada	14	-0.2863	0.144771	0.0735699	5.12947	1.24522	0.0017026	-7.58216	2.63066	0.0149117	0.992962	-6.95174	0.0787974	0.182677	0.674547	1.83488	1.56784	0.266601	-0.328669	3.30035	0.922465	-3.45216	-0.20324	0.15784	0.224306	4.39901	1.35772	0.0078741	-6.00772	2.86773	0.0601246	-2.15849	0.262576	0.15241	0.112876	0.169908	1.233	0.892888	3.3384	2.44822	0.199947	0.367286
	New Jersey	18	-1.60577	0.102206	<0.0001*	18.1807	1.02395	<0.0001*	-40.6369	2.54802	<0.0001*	0.995682	-40.5326	-1.5085	0.145975	<0.0001*	17.1982	1.45532	<0.0001*	-38.1755	3.5995	<0.0001*	-43.6052	-1.60309	0.122359	<0.0001*	18.1571	1.22399	<0.0001*	-40.5879	3.03993	<0.0001*	-43.0596	-1.54606	0.142243	<0.0001*	17.5794	1.42008	<0.0001*	-39.1356	3.51829	<0.0001*	-39.2739
	New Mexico	10	-3.01353	0.471172	0.0004*	30.3862	4.18382	0.0002*	-66.2971	9.26525	0.0002*	0.994753	-13.3018	-3.10853	0.330508	<0.0001*	31.2304	2.93468	<0.0001*	-68.1689	6.49993	<0.0001*	-6.51144	-3.19879	0.259439	<0.0001*	32.0429	2.30533	<0.0001*	-69.9933	5.11153	<0.0001*	-10.4326	-3.23403	0.235887	<0.0001*	32.3575	2.09613	<0.0001*	-70.6943	4.64812	<0.0001*	4.34109
	New York	23	-1.42275	0.210497	<0.0001*	16.741	2.07733	<0.0001*	-37.534	5.09382	<0.0001*	0.987939	-22.6261	-1.19869	0.343659	0.00231858	14.4768	3.37615	0.0004*	-31.8443	8.233	0.0010*	-38.6388	-1.32189	0.24747	<0.0001*	15.7326	2.44415	<0.0001*	-35.0235	5.99694	<0.0001*	-37.4251	-1.28558	0.363317	0.00206296	15.349	3.5821	0.0004*	-34.0129	8.77088	0.0009*	-38.4813
	North Carolina	23	0.484107	0.14521	0.00330891	-1.16408	1.2789	0.373546	4.17502	2.80148	0.15175	0.996293	-53.035	0.424818	0.191196	0.0379913	-0.656474	1.68679	0.701251	3.09335	3.69962	0.412962	-54.098	0.449365	0.180085	0.0214482	-0.862188	1.58756	0.593071	3.52114	3.48002	0.323712	-55.568	0.449231	0.180264	0.0215962	-0.861075	1.58915	0.593911	3.51885	3.48352	0.324493	-51.8475
	North Dakota	13	4.96664	5.89679	0.419329	-36.2889	45.0862	0.439607	73.5577	85.8253	0.411479	0.255069	22.418	-0.205548	1.39088	0.885452	2.20926	10.4875	0.837386	2.63452	19.6763	0.896143	0.975528	1.51629	2.688	0.585117	-9.99176	20.2869	0.632984	23.7151	38.0693	0.547263	15.3926	-0.479525	0.539629	0.39508	4.2975	4.01831	0.309989	-1.29162	7.46089	0.866012	-3.79611
	Ohio	21	0.103218	0.224491	0.651173	1.93488	2.04434	0.356451	-1.75639	4.62655	0.70866	0.982712	-12.6195	0.506356	0.316322	0.126834	-1.90698	2.79681	0.50402	7.27993	6.11928	0.249632	-27.058	0.245641	0.248855	0.336685	0.59383	2.25574	0.795345	1.37934	5.07854	0.789018	-16.571	0.489172	0.307507	0.129072	-1.74757	2.71796	0.528349	6.91066	5.94427	0.260184	-23.179
	Oklahoma	11	-13.2055	6.26715	0.0681806	124.991	56.696	0.0585738	-285.669	128.182	0.0564187	0.871483	9.6675	-7.39169	5.8629	0.242922	71.1148	52.7623	0.214633	-161.022	118.629	0.211719	10.7287	-9.64227	5.89202	0.140373	92.4442	53.2195	0.120586	-211.383	120.129	0.116512	10.7447	-6.92352	5.85933	0.271287	67.0553	52.7757	0.239584	-152.219	118.769	0.235865	18.9817
	Oregon	16	-0.759763	0.189582	0.00149068	8.96272	1.62491	<0.0001*	-15.4434	3.44872	0.0006*	0.981871	-4.21041	-0.547577	0.246806	0.0449295	7.10058	2.09944	0.00490807	-11.4023	4.41424	0.0227243	-1.86784	-0.666361	0.225748	0.0112332	8.14321	1.92863	0.0010*	-13.6632	4.0767	0.00520529	-2.1709	-0.633746	0.233049	0.0175342	7.85586	1.9891	0.00166327	-13.0369	4.19958	0.00837661	3.14566
	Pennsylvania	23	-1.37382	0.295628	0.0002*	15.7232	2.832	<0.0001*	-33.7263	6.7454	<0.0001*	0.983297	-22.7593	0.44173	0.708985	0.540295	-1.75808	6.70712	0.795909	7.8629	15.7632	0.623354	-24.0471	-1.07864	0.452942	0.0272947	12.9247	4.34014	0.00743577	-27.1567	10.3402	0.016178	-25.2271	1.01159	0.613395	0.114732	-7.14566	5.70005	0.224439	20.4918	13.1747	0.135536	-31.2742
	South Carolina	23	2.75931	0.58403	0.0001*	-22.7103	5.30727	0.0004*	54.858	12.0304	0.0002*	0.919387	-5.00247	2.30565	0.857863	0.0141545	-18.9763	7.80537	0.0245773	47.2854	17.6968	0.0146478	-18.4032	2.6678	0.639637	0.0005*	-21.9408	5.80714	0.00118095	53.2559	13.1484	0.0006*	-18.6776	2.60365	0.821229	0.00480978	-21.5532	7.45903	0.00906296	52.8227	16.8902	0.00530445	-17.8336
	South Dakota	13	14.9049	3.22341	0.0009*	-111.46	24.8226	0.00116048	215.443	47.7229	0.0011*	0.854882	3.39944	6.46437	2.04023	0.0100141	-47.9601	15.456	0.011193	96.4798	29.1782	0.00792503	-5.4895	10.6279	2.55511	0.00195043	-78.6816	19.506	0.0023852	152.774	37.1533	0.0021039	0.799361	4.29016	1.13399	0.00358282	-31.8485	8.56398	0.00398258	66.8159	16.1184	0.00199485	-5.87587
	Tennessee	22	-0.141115	0.341098	0.683721	4.7079	2.94851	0.126831	-9.00049	6.34964	0.172534	0.98312	-17.6137	-0.615027	0.494111	0.228371	8.57545	4.25248	0.0580978	-16.818	9.10321	0.0803081	-31.8958	-0.209037	0.386514	0.594911	5.25494	3.33938	0.132078	-10.0903	7.18588	0.176399	-25.3211	-0.632742	0.511287	0.23096	8.75091	4.40364	0.0615107	-17.2436	9.43592	0.0833831	-28.5622
	Texas	17	0.129958	0.169617	0.456289	1.96449	1.44324	0.19497	-1.76571	3.04474	0.571184	0.990485	-10.9263	0.119342	0.216984	0.590986	1.90479	1.82305	0.313804	-1.32457	3.784	0.731514	-16.9724	0.0717348	0.17705	0.691478	2.4314	1.49781	0.126818	-2.68889	3.13823	0.405974	-18.5299	0.091176	0.212425	0.674298	2.17906	1.78418	0.242134	-1.9703	3.70489	0.603194	-15.9144
	Utah	12	-0.961882	0.0465395	<0.0001*	10.9695	0.419351	<0.0001*	-20.1312	0.941176	<0.0001*	0.999702	-60.753	-0.95951	0.044174	<0.0001*	10.9468	0.398033	<0.0001*	-20.0774	0.893384	<0.0001*	-54.5403	-0.953634	0.0293868	<0.0001*	10.8844	0.264228	<0.0001*	-19.9163	0.592279	<0.0001*	-57.33	-0.955487	0.0324712	<0.0001*	10.903	0.292039	<0.0001*	-19.9626	0.654713	<0.0001*	-48.79
	Virginia	23	-1.77103	1.0914	0.120308	18.9451	9.48782	0.0596401	-39.9676	20.5628	0.0661393	0.906792	14.5454	-4.70567	1.28689	0.00156782	45.8459	10.8928	0.0004*	-100.932	22.9548	0.0003*	-0.549684	-4.06138	1.19154	0.00278617	39.1496	10.311	0.0011*	-84.3123	22.2572	0.00115414	9.27453	-4.68341	1.42024	0.00359603	45.6331	11.9355	0.0011*	-100.434	24.9569	0.0007*	1.22121
	Washington	13	-0.414039	0.0699971	0.0001*	6.1428	0.651011	<0.0001*	-9.72314	1.50663	<0.0001*	0.99844	-41.1902	-0.39919	0.0770638	0.0004*	5.99875	0.715308	<0.0001*	-9.37583	1.65157	0.0002*	-35.9247	-0.388513	0.0847906	0.0010*	5.89627	0.786494	<0.0001*	-9.13112	1.81439	0.0005*	-36.6576	-0.401832	0.0765469	0.0004*	6.02857	0.711517	<0.0001*	-9.45678	1.64537	0.0002*	-29.8669
	West Virginia	15	3.14839	0.540002	<0.0001*	-23.977	4.61847	0.0002*	53.0872	9.85057	0.0002*	0.988724	-30.7608	2.90455	0.585344	0.0003*	-21.9071	4.99605	0.0009*	48.7086	10.6327	0.0006*	-26.606	2.65849	0.616357	0.0010*	-19.8103	5.25509	0.00267306	44.2559	11.171	0.0018876	-27.7675	2.9105	0.574364	0.0003*	-21.9457	4.90361	0.0008*	48.7641	10.4388	0.0005*	-22.217
	Wisconsin	17	-0.767901	0.514524	0.157771	9.85059	4.6122	0.050846	-19.4229	10.307	0.0804397	0.968381	-9.52886	-0.348736	0.627291	0.587027	5.89202	5.53617	0.305216	-10.1452	12.1581	0.418048	-19.1618	-0.768531	0.540476	0.176935	9.82479	4.82678	0.0611888	-19.2935	10.742	0.094087	-17.2672	-0.615591	0.646912	0.357448	8.34213	5.73142	0.167585	-15.7345	12.6422	0.233712	-15.7008
	Wyoming	11	-5.75727	0.989156	0.0004*	50.7079	8.23539	0.0003*	-103.007	17.1208	0.0003*	0.986253	-21.8815	-5.8051	0.953281	0.0003*	51.1001	7.93488	0.0002*	-103.811	16.4924	0.0002*	-14.5821	-6.24935	0.613771	<0.0001*	54.7407	5.0998	<0.0001*	-111.259	10.5828	<0.0001*	-17.6825	-6.14321	0.672835	<0.0001*	53.8694	5.59209	<0.0001*	-109.473	11.6073	<0.0001*	-6.82599
density	Alabama	20	2.20831	0.334133	<0.0001*	-1.84615	0.6744	0.0140317	1.10089	0.317448	0.0029415	0.968266	-8.88966	1.61334	0.416228	0.00121299	-0.883546	0.759765	0.260927	0.816342	0.328919	0.0238132	-21.1828	1.99858	0.349863	<0.0001*	-1.43608	0.691138	0.0531882	0.920931	0.317094	0.00987251	-15.3206	1.58193	0.427253	0.00176801	-0.804912	0.782583	0.318112	0.773499	0.337435	0.0349202	-17.8892
	Alaska	6	1.5133	1.19263	0.293992	1.2545	0.614267	0.133754	1.16264	0.0577486	0.0003*	0.978898	26.7662	1.30642	1.1751	0.347323	1.36031	0.594544	0.106152	1.15955	0.0588893	0.0003*	Inf	0.888135	1.13648	0.491521	1.59126	0.553508	0.0637962	1.1464	0.062283	0.0003*	Inf	0.359122	0.95989	0.733187	1.78494	0.462622	0.0307677	1.17299	0.0821467	0.0007*	-94.5383
	Arkansas	18	1.71343	0.360325	0.0003*	0.314135	0.494336	0.534698	-0.444064	0.156321	0.0123971	0.957808	4.08854	0.555044	0.311305	0.0948372	1.18154	0.340366	0.00341844	-0.0617407	0.423402	0.886005	-14.3565	1.50091	0.362589	0.0009*	0.601408	0.477592	0.227184	-0.501422	0.155619	0.00569979	-3.09825	0.33712	0.323542	0.313931	1.18615	0.358278	0.00475342	0.128892	0.612146	0.836067	-12.7574
	California	17	-0.530655	0.0421038	<0.0001*	3.49185	0.10879	<0.0001*	0.635534	0.0772215	<0.0001*	0.995756	-24.5294	-0.414043	0.0429351	<0.0001*	3.23963	0.0655977	<0.0001*	0.605065	0.117732	0.0002*	-41.9713	-0.477405	0.0371291	<0.0001*	3.3439	0.0824435	<0.0001*	0.706667	0.067213	<0.0001*	-32.0161	-0.337638	0.0377276	<0.0001*	3.14864	0.0492068	<0.0001*	0.472574	0.174945	0.0172135	-43.2466
	Colorado	14	-1.52236	0.523952	0.0143028	5.86972	1.04716	0.0002*	-0.762873	0.3632	0.0595571	0.983376	2.50243	-0.655357	0.32965	0.072269	4.42491	0.634807	<0.0001*	-0.659308	0.41538	0.140766	-4.55339	-1.28675	0.519318	0.0306947	5.47753	1.04674	0.0003*	-0.72562	0.376284	0.0800059	2.15971	-0.518361	0.237596	0.0517121	4.38937	0.463505	<0.0001*	-0.924252	0.514083	0.09967	-1.62744
	Florida	17	-0.000598476	0.13247	0.996459	2.34096	0.307084	<0.0001*	-0.108711	0.146164	0.469324	0.985077	-0.423702	0.0412907	0.166879	0.808168	2.09576	0.38859	<0.0001*	0.0824114	0.210857	0.701798	-14.3132	0.0517393	0.133074	0.703272	2.17606	0.30475	<0.0001*	-0.0108325	0.143339	0.940829	-11.6788	0.196466	0.167151	0.259446	1.67192	0.377792	0.0006*	0.268269	0.21795	0.238648	-19.9877
	Georgia	22	-0.490027	0.312059	0.132849	4.24859	0.774372	<0.0001*	-1.76491	0.451832	0.0009*	0.975761	-7.20535	-0.399024	0.428889	0.363852	3.96138	1.07724	0.00160034	-1.56183	0.632208	0.0231358	-10.0648	-0.460066	0.365597	0.223493	4.15138	0.910755	0.0002*	-1.69421	0.532192	0.00489215	-8.85986	-0.402013	0.42588	0.35704	3.97355	1.06809	0.00145121	-1.57171	0.626248	0.0212992	-6.25904
	Idaho	13	0.800698	0.131788	0.0001*	1.66988	0.141142	<0.0001*	0.0806146	0.0415439	0.0810181	0.994167	-23.3304	0.724466	0.142677	0.0005*	1.63311	0.139102	<0.0001*	0.136114	0.0653793	0.0639914	-25.0181	0.773592	0.135313	0.0002*	1.67178	0.14099	<0.0001*	0.0922841	0.04432	0.0639589	-22.7117	0.700582	0.146828	0.0008*	1.65615	0.144264	<0.0001*	0.136088	0.0649303	0.0625055	-18.3434
	Illinois	20	0.793183	0.250231	0.00559959	1.45515	0.526038	0.0132101	-0.336626	0.245647	0.188398	0.968997	16.3928	0.920261	0.296578	0.00646381	0.986582	0.525018	0.0774813	-0.100571	0.322368	0.758852	-4.94967	0.773742	0.258252	0.00812247	1.48348	0.529992	0.0123299	-0.346209	0.241324	0.169535	2.5156	0.877411	0.32626	0.0155176	1.05833	0.582647	0.0869826	-0.104148	0.336312	0.76057	-7.55129
	Indiana	20	1.58693	0.375928	0.0006*	-1.1646	0.960566	0.241936	1.13958	0.581886	0.0667965	0.961645	0.965393	1.3013	0.440005	0.00881852	-0.764326	1.03139	0.468769	1.12566	0.562484	0.0615941	-22.3113	1.45986	0.375401	0.00118002	-0.852108	0.94532	0.379971	0.961104	0.560079	0.104325	-13.6957	1.08077	0.478246	0.0372481	-0.204736	1.12798	0.858117	0.820474	0.615838	0.200351	-25.2804
	Iowa	17	4.5464	1.21314	0.00216351	-6.13244	2.23068	0.0156714	3.07941	0.943894	0.00567046	0.817919	11.2814	-0.356313	0.897864	0.697466	1.81323	1.41146	0.219766	0.759164	0.670007	0.276218	-6.22057	2.98708	1.17574	0.0235431	-3.23048	2.09262	0.144946	1.88061	0.843653	0.0427003	4.39679	-0.947303	0.501127	0.0795928	2.62008	0.946946	0.0151349	0.64214	0.681314	0.361916	-14.512
	Kansas	15	-0.0257599	0.831311	0.975789	3.57185	1.60424	0.045899	-0.841168	0.753064	0.285863	0.968544	-13.2486	1.63088	1.04326	0.143969	0.208443	1.89604	0.914277	0.780341	0.819742	0.359911	-14.5411	1.06971	0.930519	0.272712	1.34046	1.76571	0.462409	0.26394	0.810395	0.750266	-15.7773	1.88735	1.0706	0.103343	-0.271882	2.0063	0.894452	1.02376	0.904353	0.279735	-11.1768
	Kentucky	22	1.76377	0.333645	<0.0001*	-1.24931	0.795115	0.132633	1.34712	0.454606	0.00798465	0.98127	-24.9858	1.27118	0.442461	0.00973948	-0.289582	0.999641	0.775194	0.954827	0.53654	0.0911427	-33.6854	1.61094	0.355816	0.0002*	-0.910377	0.837768	0.290777	1.17244	0.472004	0.0224876	-29.9019	1.25675	0.441339	0.0102965	-0.22855	1.0012	0.821871	0.903102	0.539977	0.110816	-30.4696
	Louisiana	20	-1.39657	0.145191	<0.0001*	5.55078	0.3608	<0.0001*	-1.11099	0.212589	<0.0001*	0.988965	-35.33	-1.41606	0.201466	<0.0001*	5.54002	0.461524	<0.0001*	-1.08081	0.248656	0.0004*	-40.8696	-1.34191	0.175307	<0.0001*	5.39073	0.424689	<0.0001*	-1.00729	0.242969	0.0007*	-38.7356	-1.40352	0.204045	<0.0001*	5.51271	0.469486	<0.0001*	-1.06674	0.253798	0.0006*	-36.8727
	Maine	16	-5.04447	0.648893	<0.0001*	16.3246	1.74734	<0.0001*	-10.1143	1.16825	<0.0001*	0.994073	-64.1533	-3.91491	0.983998	0.00157436	13.2849	2.67636	0.0003*	-8.09024	1.80434	0.0006*	-67.8679	-4.75077	0.772322	<0.0001*	15.5497	2.08371	<0.0001*	-9.60753	1.39538	<0.0001*	-65.9892	-2.87295	1.13	0.0245411	10.3396	3.07635	0.00511151	-6.04032	2.07606	0.0121835	-63.9569
	Maryland	23	-1.59152	0.377247	0.0004*	8.85412	1.46914	<0.0001*	-6.15459	1.36268	0.0002*	0.961276	5.09942	-0.958949	0.131902	<0.0001*	6.73339	0.508722	<0.0001*	-4.67468	0.706092	<0.0001*	-33.835	-1.1153	0.271647	0.0005*	7.30114	1.098	<0.0001*	-5.10503	1.06203	0.0001*	-6.47674	-1.08807	0.0690071	<0.0001*	7.23489	0.279938	<0.0001*	-5.09632	0.53953	<0.0001*	-40.9241
	Michigan	18	-0.358353	0.400415	0.384948	3.77323	1.04597	0.0025861	-1.10869	0.634793	0.101158	0.960175	7.66166	0.0308851	0.471408	0.948628	2.62911	1.15163	0.0374362	-0.388389	0.647865	0.557793	-9.17188	-0.217619	0.384448	0.579726	3.34755	0.984935	0.00396792	-0.812342	0.581212	0.182542	-6.6499	0.011983	0.470656	0.980023	2.60821	1.14389	0.0376419	-0.296379	0.636118	0.647968	-16.2536
	Minnesota	16	-0.20563	0.219147	0.365188	2.99187	0.467203	<0.0001*	0.0852062	0.232762	0.720204	0.982026	-11.5613	0.214074	0.293932	0.479337	2.05138	0.571686	0.00330502	0.524717	0.260789	0.0654143	-10.5679	-0.0737696	0.250726	0.773232	2.67214	0.517115	0.0002*	0.261267	0.247707	0.310752	-10.2779	0.16183	0.289162	0.58523	2.15314	0.570201	0.00230988	0.495958	0.262016	0.0808539	-5.31823
	Mississippi	20	3.36126	0.698172	0.0002*	-4.25774	1.28436	0.00409478	2.19101	0.541382	0.0008*	0.883852	3.5252	1.06127	0.803837	0.204251	-0.470291	1.38337	0.73805	1.03422	0.581574	0.0932413	-17.883	2.79874	0.704163	0.0010*	-3.18874	1.28042	0.023404	1.73472	0.53063	0.00452107	-9.05339	0.283883	0.582389	0.63217	0.682183	1.11019	0.547038	0.784283	0.597088	0.206462	-22.8205
	Missouri	19	0.127375	0.321014	0.696764	2.86736	0.725922	0.0011*	-0.244689	0.336299	0.477376	0.981648	2.63998	0.938274	0.323112	0.0103576	1.39912	0.688172	0.0589784	-0.0622363	0.405604	0.879969	-8.24891	0.464352	0.352347	0.206102	2.11117	0.766008	0.0140576	0.0663601	0.330656	0.843468	-4.07579	0.845246	0.305634	0.0137859	1.59279	0.652423	0.0266298	-0.128043	0.397991	0.751827	-3.95322
	Montana	13	-4.01616	2.3762	0.121878	3.62836	1.24141	0.0152277	0.47798	0.159444	0.0133941	0.68527	-10.68	-2.27294	1.13539	0.0731551	3.7222	0.596228	<0.0001*	0.280903	0.16677	0.123015	-23.8452	-1.64747	1.68083	0.35013	2.68682	0.910353	0.0144996	0.520165	0.13252	0.00284229	-13.5592	-2.13283	0.955123	0.0495864	3.68835	0.549528	<0.0001*	0.276559	0.159891	0.114376	-18.7258
	Nebraska	15	2.15306	0.456109	0.0005*	-0.200556	0.694084	0.77755	0.937193	0.249281	0.00272298	0.973607	-13.0802	2.55171	0.517313	0.0003*	-0.852426	0.737359	0.270157	1.16489	0.24362	0.0004*	-10.0413	2.39367	0.483772	0.0003*	-0.603235	0.716209	0.416113	1.08851	0.248758	0.0009*	-9.31316	2.47412	0.517391	0.0004*	-0.739242	0.732992	0.333106	1.1275	0.239305	0.0005*	-4.41557
	Nevada	12	-0.357343	0.0399394	<0.0001*	2.54235	0.045818	<0.0001*	0.563782	0.00964531	<0.0001*	0.999547	-45.9474	-0.353085	0.0353905	<0.0001*	2.53793	0.0402133	<0.0001*	0.563922	0.00800704	<0.0001*	-40.0704	-0.352462	0.0251475	<0.0001*	2.53951	0.0266605	<0.0001*	0.564144	0.00273071	<0.0001*	-44.7742	-0.353798	0.0265211	<0.0001*	2.5406	0.028318	<0.0001*	0.564133	0.00296857	<0.0001*	-36.0704
	New Jersey	18	-1.30749	0.0940773	<0.0001*	8.07297	0.421472	<0.0001*	-6.24296	0.45126	<0.0001*	0.995399	-33.4744	-1.12904	0.0980845	<0.0001*	7.32724	0.408403	<0.0001*	-5.55416	0.398475	<0.0001*	-52.8409	-1.27653	0.0959636	<0.0001*	7.93544	0.426276	<0.0001*	-6.10041	0.450505	<0.0001*	-44.5022	-1.0718	0.107116	<0.0001*	7.1115	0.446471	<0.0001*	-5.38866	0.438792	<0.0001*	-53.6294
	New Mexico	10	-1.0611	0.109156	<0.0001*	4.19995	0.146338	<0.0001*	-0.243853	0.0406715	0.0005*	0.999256	-31.7035	-1.0594	0.0833162	<0.0001*	4.19088	0.112145	<0.0001*	-0.23785	0.031569	0.0001*	-23.7829	-1.07103	0.0594595	<0.0001*	4.20828	0.0813547	<0.0001*	-0.243035	0.0235817	<0.0001*	-28.7813	-1.07051	0.0552912	<0.0001*	4.20684	0.0757654	<0.0001*	-0.242246	0.0220711	<0.0001*	-13.9215
	New York	23	-0.701842	0.120738	<0.0001*	5.24639	0.581841	<0.0001*	-2.1999	0.672488	0.00381983	0.98745	-28.2174	-0.142056	0.230402	0.544482	2.80052	1.12337	0.0215549	0.132	1.31954	0.921313	-33.2339	-0.602368	0.168401	0.00188654	4.80867	0.811872	<0.0001*	-1.7686	0.938836	0.074211	-33.459	0.0596093	0.14967	0.69465	2.11097	0.731367	0.00912808	0.47433	0.918553	0.611246	-40.9486
	North Carolina	23	0.976045	0.176592	<0.0001*	0.428883	0.437629	0.338785	-0.0700799	0.2507	0.782703	0.99168	-32.6326	0.802172	0.265809	0.00679706	0.746509	0.669865	0.278314	-0.170939	0.384218	0.661169	-49.1264	0.94849	0.202693	0.0001*	0.482078	0.503455	0.349727	-0.0908167	0.287796	0.755606	-46.2808	0.888429	0.271302	0.00379016	0.54509	0.678579	0.431255	-0.0695518	0.387307	0.859291	-48.6841
	North Dakota	13	-8.47449	6.79319	0.240638	5.86637	4.05963	0.179041	0.0691407	0.473515	0.88681	0.0583773	23.2344	-3.58168	1.64177	0.054099	2.13924	0.881583	0.0356574	0.7592	0.563509	0.207626	1.25701	-4.17332	3.47999	0.258082	3.14874	1.82715	0.115555	0.340621	0.316838	0.307599	16.1798	-3.53038	0.852676	0.00201071	2.26809	0.457981	0.0006*	0.723915	0.515265	0.190334	0.0169238
	Ohio	21	0.37333	0.18206	0.0551581	1.59645	0.515707	0.00623828	-0.100228	0.344807	0.774619	0.980292	-9.10106	0.672221	0.218381	0.00648089	0.600055	0.523937	0.267093	0.599473	0.312817	0.0713362	-27.7141	0.52528	0.190161	0.0128315	1.11913	0.523096	0.0463532	0.24635	0.338372	0.475951	-15.0243	0.675592	0.220031	0.00659168	0.589119	0.527548	0.278803	0.608617	0.314299	0.0686769	-23.7313
	Oklahoma	11	-10.6795	3.86136	0.0244576	31.2203	9.45012	0.0107993	-19.1708	5.74703	0.0102957	0.920422	5.3635	-6.9986	3.84084	0.105903	21.493	9.2188	0.0480543	-12.8504	5.47656	0.0469419	7.53025	-8.26369	3.72192	0.0571573	25.0899	9.04476	0.0241482	-15.3119	5.45644	0.0229769	7.09002	-6.61197	3.81651	0.121427	20.6354	9.17401	0.0546243	-12.3704	5.46085	0.053281	15.952
	Oregon	16	-0.84094	0.0818913	<0.0001*	3.78011	0.138854	<0.0001*	0.15076	0.0528478	0.0135861	0.996324	-28.4606	-0.837073	0.0841678	<0.0001*	3.77328	0.142415	<0.0001*	0.152899	0.0541904	0.0144231	-24.1239	-0.837685	0.0839556	<0.0001*	3.77439	0.142095	<0.0001*	0.152534	0.0540669	0.0144316	-24.1223	-0.836263	0.084342	<0.0001*	3.77179	0.142659	<0.0001*	0.153391	0.0542897	0.0143159	-18.7918
	Pennsylvania	23	-0.909095	0.171248	<0.0001*	5.33764	0.595456	<0.0001*	-1.7769	0.491309	0.00172046	0.990142	-37.4217	-0.356744	0.336561	0.301793	3.47309	1.13895	0.00633014	-0.415853	0.912008	0.653321	-50.0621	-0.898322	0.210946	0.0004*	5.3164	0.733134	<0.0001*	-1.78479	0.603855	0.00781712	-50.9163	0.00625576	0.332363	0.98517	2.38698	1.14158	0.049506	0.280254	0.950638	0.77118	-54.8108
	South Carolina	23	1.51637	0.266823	<0.0001*	-0.771572	0.616771	0.225376	0.397708	0.33622	0.250727	0.97843	-18.2644	1.06803	0.359866	0.0076062	0.133401	0.811108	0.871014	-4.28938e-05	0.427855	0.999921	-30.4506	1.41243	0.290367	<0.0001*	-0.553683	0.665854	0.415488	0.293239	0.359178	0.423881	-25.9703	1.1035	0.360747	0.00619517	0.0576708	0.81348	0.944186	0.0343617	0.429334	0.937005	-26.8249
	South Dakota	13	16.8188	5.02327	0.00738807	-14.1169	5.22153	0.0221757	3.55109	1.30127	0.021232	0.759081	4.86481	5.6686	2.49007	0.0460605	-4.17277	2.37222	0.109078	1.79222	0.580629	0.0115088	-9.14566	11.9429	3.84623	0.0111533	-9.22412	3.77798	0.034757	2.4318	0.861606	0.018086	0.12257	1.9036	1.71285	0.292416	-0.603202	1.58	0.710616	1.10464	0.488739	0.047354	-9.02561
	Tennessee	22	1.06436	0.307654	0.00262522	0.55298	0.710683	0.446095	-0.0332901	0.387915	0.932509	0.975866	-10.4079	0.600809	0.455043	0.202408	1.33322	1.02214	0.207696	-0.256128	0.535447	0.637863	-24.3292	1.01889	0.343638	0.00795389	0.61463	0.789519	0.445869	-0.038457	0.427061	0.92919	-16.744	0.613542	0.46098	0.198957	1.31141	1.03663	0.22114	-0.249644	0.543379	0.651139	-20.5465
	Texas	17	0.32458	0.156556	0.0570839	2.30143	0.271066	<0.0001*	-0.179601	0.107756	0.117773	0.989281	-11.7651	0.310129	0.190257	0.125375	2.17654	0.307017	<0.0001*	-0.0678608	0.141923	0.639921	-18.3752	0.346284	0.149736	0.0364652	2.22319	0.248732	<0.0001*	-0.131364	0.100054	0.210319	-21.0127	0.350263	0.184567	0.078544	2.12557	0.292033	<0.0001*	-0.0540416	0.128814	0.681193	-18.117
	Utah	12	-0.515474	0.0542986	<0.0001*	3.17586	0.114425	<0.0001*	0.292544	0.055869	0.0005*	0.999437	-53.4609	-0.564113	0.0640205	<0.0001*	3.2944	0.134103	<0.0001*	0.226949	0.0644183	0.00648424	-50.696	-0.554713	0.0597051	<0.0001*	3.26714	0.124189	<0.0001*	0.243296	0.0595274	0.00272877	-51.4141	-0.578626	0.0657759	<0.0001*	3.32651	0.136605	<0.0001*	0.210408	0.0650394	0.010239	-43.2494
	Virginia	23	-1.63599	0.296563	<0.0001*	8.28851	1.10174	<0.0001*	-4.71915	0.909361	<0.0001*	0.961479	17.7778	-1.63277	0.162155	<0.0001*	8.88562	0.614895	<0.0001*	-5.88524	0.685729	<0.0001*	3.15751	-1.6284	0.228235	<0.0001*	8.34931	0.85577	<0.0001*	-4.87384	0.727032	<0.0001*	12.5088	-1.61992	0.163497	<0.0001*	8.82217	0.616168	<0.0001*	-5.82011	0.685251	<0.0001*	6.83239
	Washington	13	-0.446521	0.0466918	<0.0001*	3.2889	0.103592	<0.0001*	-0.470651	0.0534328	<0.0001*	0.999306	-50.46	-0.452687	0.0434748	<0.0001*	3.30385	0.0967235	<0.0001*	-0.479053	0.0501177	<0.0001*	-45.0152	-0.486505	0.0260916	<0.0001*	3.38634	0.0593528	<0.0001*	-0.52548	0.0318803	<0.0001*	-49.8087	-0.484171	0.026877	<0.0001*	3.3807	0.0610814	<0.0001*	-0.52227	0.032753	<0.0001*	-42.4041
	West Virginia	15	0.882766	0.464072	0.0814112	-0.624078	1.23986	0.623834	2.05281	0.81076	0.0263243	0.979158	-39.8815	0.54623	0.462896	0.260853	0.240795	1.20566	0.845044	1.50862	0.765764	0.0723475	-42.5405	0.606178	0.447461	0.200467	0.107885	1.1809	0.928715	1.57992	0.761026	0.0600423	-43.2823	0.328408	0.455189	0.484436	0.819989	1.18776	0.503098	1.13697	0.756049	0.158481	-39.416
	Wisconsin	17	-1.18221	0.434494	0.0165647	6.11656	1.18204	0.0001*	-2.48162	0.775195	0.00640418	0.974825	-10.4141	-0.0726655	0.534695	0.893834	2.94964	1.35113	0.0465516	-0.384347	0.808057	0.641665	-20.7707	-0.838002	0.447761	0.0823133	5.1169	1.19919	0.0008*	-1.7821	0.770201	0.0363838	-18.4778	-0.073765	0.554923	0.896142	2.9509	1.40151	0.0537816	-0.361808	0.835646	0.671634	-22.1406
	Wyoming	11	0.247316	1.02791	0.815915	2.39863	0.303062	<0.0001*	-0.0762865	0.0445147	0.124926	0.945735	-7.66036	0.955347	1.09484	0.40831	2.01322	0.322345	0.0002*	-0.0585881	0.0737479	0.449863	-2.04427	0.868712	1.04678	0.430669	2.08708	0.303042	0.0001*	-0.0584121	0.0577637	0.341512	-2.61286	1.0782	0.881603	0.256131	0.985227	0.311847	0.0134085	0.0642971	0.243948	0.798774	7.05865
