# Supplementary material for: Analyzing and interpreting spatial and temporal variability of the United States county population distributions using Taylor's law
Source: PLoS One. 2019 Dec 11;14(12):e0226096. doi: 10.1371/journal.pone.0226096 (PMC6905577; doi:10.1371/journal.pone.0226096)
Supplement: S19 Table — (XLSX) [file pone.0226096.s071.xlsx]

## Sheet: sheet1
Table S19. Ordinary least-squares linear regression statistics of the temporal TL with the minimum number of sampling units requirement (n ≥ 15), using count and density separately. Columns are defined in Table S15
measure	state	N	est_slp_ols	err_slp_ols	p_slp_ols	est_int_ols	err_int_ols	p_int_ols	adjr2
count	Alabama	63	2.94486	0.158764	<0.0001*	-4.92988	0.708451	<0.0001*	0.846934
	Arkansas	61	2.69779	0.0976033	<0.0001*	-3.63947	0.414446	<0.0001*	0.927095
	California	49	2.20227	0.0409998	<0.0001*	-1.03592	0.197549	<0.0001*	0.98363
	Connecticut	8	2.28742	0.181668	<0.0001*	-1.68999	0.92871	0.118667	0.957457
	Florida	39	2.51898	0.100894	<0.0001*	-2.48831	0.455126	<0.0001*	0.942453
	Georgia	130	2.77294	0.092818	<0.0001*	-3.81429	0.390752	<0.0001*	0.873593
	Illinois	102	2.5603	0.0615102	<0.0001*	-3.22208	0.272588	<0.0001*	0.944886
	Indiana	92	2.85414	0.0972116	<0.0001*	-4.47884	0.428084	<0.0001*	0.904413
	Iowa	98	2.29429	0.116663	<0.0001*	-2.15595	0.497703	<0.0001*	0.799067
	Kansas	62	2.24562	0.113065	<0.0001*	-1.93939	0.479108	0.0002*	0.865777
	Kentucky	114	2.95679	0.125394	<0.0001*	-4.84206	0.52405	<0.0001*	0.830843
	Louisiana	52	2.77829	0.142544	<0.0001*	-3.98271	0.630105	<0.0001*	0.881366
	Maine	16	3.18791	0.303844	<0.0001*	-6.62876	1.41341	0.0003*	0.879111
	Maryland	23	2.81204	0.229561	<0.0001*	-4.18471	1.0834	0.0009*	0.871385
	Massachusetts	14	2.21041	0.105534	<0.0001*	-1.43729	0.538316	0.0204118	0.971156
	Michigan	72	2.27474	0.0552435	<0.0001*	-1.71271	0.249348	<0.0001*	0.959785
	Minnesota	69	2.38508	0.119189	<0.0001*	-2.2971	0.518019	<0.0001*	0.854525
	Mississippi	65	2.60855	0.194362	<0.0001*	-3.3868	0.8381	0.0001*	0.736761
	Missouri	114	2.66841	0.0918336	<0.0001*	-3.57056	0.389106	<0.0001*	0.881837
	Nebraska	44	2.28001	0.127033	<0.0001*	-2.00878	0.528587	0.0005*	0.881912
	Nevada	12	2.40445	0.311198	<0.0001*	-1.7152	1.22179	0.190652	0.842176
	New Hampshire	10	2.7515	0.225935	<0.0001*	-4.09899	1.0534	0.00460136	0.942422
	New Jersey	21	2.03559	0.158431	<0.0001*	-0.308015	0.810461	0.708124	0.891353
	New York	60	2.74854	0.106692	<0.0001*	-4.39764	0.519128	<0.0001*	0.918243
	North Carolina	90	3.05042	0.0883534	<0.0001*	-5.09146	0.3897	<0.0001*	0.930468
	Ohio	88	2.74333	0.0870577	<0.0001*	-4.07801	0.40359	<0.0001*	0.919368
	Oregon	22	2.48396	0.148561	<0.0001*	-2.46651	0.677636	0.00163003	0.929898
	Pennsylvania	66	2.62143	0.0929129	<0.0001*	-3.53857	0.443374	<0.0001*	0.92442
	Rhode Island	5	1.95379	0.175077	0.0015421	0.0370226	0.838839	0.96757	0.968636
	South Carolina	31	3.26177	0.227528	<0.0001*	-6.32053	1.0452	<0.0001*	0.872075
	Tennessee	85	2.76445	0.118545	<0.0001*	-3.99593	0.512055	<0.0001*	0.865989
	Texas	141	2.45389	0.0543629	<0.0001*	-2.38674	0.236779	<0.0001*	0.935678
	Vermont	14	2.28397	0.255629	<0.0001*	-2.28364	1.11139	0.0623459	0.858432
	Virginia	101	3.03492	0.153962	<0.0001*	-5.16514	0.651569	<0.0001*	0.7949
	West Virginia	53	2.68359	0.164753	<0.0001*	-3.91788	0.713114	<0.0001*	0.835608
	Wisconsin	58	2.72428	0.134635	<0.0001*	-4.05894	0.60989	<0.0001*	0.877534
density	Alabama	63	2.78933	0.174438	<0.0001*	-1.59298	0.206609	<0.0001*	0.804226
	Arkansas	61	2.64257	0.100809	<0.0001*	-1.24197	0.100407	<0.0001*	0.919588
	California	49	2.11466	0.0377474	<0.0001*	-0.18862	0.052462	0.0008*	0.984931
	Connecticut	8	2.38813	0.15433	<0.0001*	-0.960747	0.298642	0.0182046	0.971481
	Florida	39	2.51825	0.117274	<0.0001*	-0.727731	0.146632	<0.0001*	0.92371
	Georgia	130	2.62273	0.0934744	<0.0001*	-1.28275	0.118342	<0.0001*	0.859058
	Illinois	102	2.6985	0.0728637	<0.0001*	-1.63654	0.097283	<0.0001*	0.931366
	Indiana	92	2.85634	0.112259	<0.0001*	-1.92236	0.160575	<0.0001*	0.876594
	Iowa	98	2.26173	0.129753	<0.0001*	-1.18977	0.145551	<0.0001*	0.757404
	Kansas	62	2.12121	0.0977316	<0.0001*	-1.01593	0.102426	<0.0001*	0.88514
	Kentucky	114	2.69946	0.141815	<0.0001*	-1.65622	0.181258	<0.0001*	0.76177
	Louisiana	52	2.49538	0.122417	<0.0001*	-1.08502	0.152228	<0.0001*	0.890444
	Maine	16	2.27322	0.186886	<0.0001*	-1.38102	0.221382	<0.0001*	0.907382
	Maryland	23	2.41998	0.19422	<0.0001*	-1.04468	0.347418	0.00671382	0.875178
	Massachusetts	14	2.13756	0.136365	<0.0001*	-0.65455	0.287851	0.0421389	0.949556
	Michigan	72	2.26918	0.052992	<0.0001*	-0.81061	0.0714995	<0.0001*	0.962703
	Minnesota	69	2.21221	0.101349	<0.0001*	-0.847145	0.114787	<0.0001*	0.874872
	Mississippi	65	2.44756	0.20741	<0.0001*	-1.20138	0.23329	<0.0001*	0.683567
	Missouri	114	2.61967	0.0920183	<0.0001*	-1.36737	0.0995517	<0.0001*	0.877505
	Nebraska	44	2.23243	0.12044	<0.0001*	-1.06974	0.125326	<0.0001*	0.888476
	Nevada	12	2.38093	0.132997	<0.0001*	-0.0546214	0.0879135	0.548297	0.966716
	New Hampshire	10	2.5535	0.206591	<0.0001*	-1.26261	0.279837	0.00197075	0.944021
	New Jersey	21	1.90901	0.0977188	<0.0001*	0.0862052	0.222339	0.702532	0.950081
	New York	60	2.43077	0.0724093	<0.0001*	-1.43465	0.128129	<0.0001*	0.950208
	North Carolina	90	2.87877	0.118213	<0.0001*	-1.56293	0.157834	<0.0001*	0.869317
	Ohio	88	2.72948	0.0870666	<0.0001*	-1.75502	0.137852	<0.0001*	0.918599
	Oregon	22	2.26737	0.0865964	<0.0001*	-0.472063	0.0942042	<0.0001*	0.970236
	Pennsylvania	66	2.4197	0.0929087	<0.0001*	-1.20418	0.150327	<0.0001*	0.912432
	Rhode Island	5	1.85374	0.176362	0.00183893	0.147193	0.388706	0.730141	0.964752
	South Carolina	31	3.252	0.226033	<0.0001*	-2.05648	0.296502	<0.0001*	0.872879
	Tennessee	85	2.81997	0.13208	<0.0001*	-1.65871	0.166803	<0.0001*	0.84411
	Texas	141	2.40102	0.054901	<0.0001*	-0.790097	0.0585634	<0.0001*	0.931761
	Vermont	14	2.52915	0.327718	<0.0001*	-1.5975	0.369819	0.0010*	0.818332
	Virginia	101	2.71834	0.119832	<0.0001*	-1.69288	0.162834	<0.0001*	0.837025
	West Virginia	53	2.4886	0.145176	<0.0001*	-1.60624	0.197702	<0.0001*	0.849209
	Wisconsin	58	2.47851	0.121471	<0.0001*	-1.37918	0.162602	<0.0001*	0.879321
