# Supplementary material for: Analyzing and interpreting spatial and temporal variability of the United States county population distributions using Taylor's law
Source: PLoS One. 2019 Dec 11;14(12):e0226096. doi: 10.1371/journal.pone.0226096 (PMC6905577; doi:10.1371/journal.pone.0226096)
Supplement: S20 Table — (XLSX) [file pone.0226096.s072.xlsx]

## Sheet: sheet1
Table S20. Ordinary least-squares quadratic regression statistics of the temporal QTL with the minimum number of sampling units requirement (n ≥ 15), using count and density separately. Columns are defined in Table S15
measure	state	N	est_qua_ols	err_qua_ols	p_qua_ols	est_slp_ols	err_slp_ols	p_slp_ols	est_int_ols	err_int_ols	p_int_ols	adjr2
count	Alabama	63	-0.489841	0.353091	0.170483	7.50885	3.29361	0.0261876	-15.5061	7.65599	0.0472861	0.849219
	Arkansas	61	0.142695	0.237582	0.550437	1.44841	2.08249	0.489507	-0.917286	4.55144	0.840984	0.926297
	California	49	-0.0670155	0.0387234	0.0902233	2.83632	0.368565	<0.0001*	-2.5021	0.869011	0.00603116	0.984297
	Connecticut	8	1.21774	0.960818	0.260833	-10.2411	9.88677	0.347753	30.3786	25.3183	0.283937	0.961361
	Florida	39	-0.17701	0.17955	0.330785	4.14937	1.65686	0.0169362	-6.18889	3.78119	0.110395	0.942409
	Georgia	130	-0.0767981	0.156721	0.624958	3.44308	1.37071	0.0132623	-5.26453	2.98532	0.0802258	0.872839
	Illinois	102	-0.0992602	0.0719063	0.170569	3.49994	0.683441	<0.0001*	-5.41821	1.6139	0.0011*	0.94538
	Indiana	92	-0.312388	0.175535	0.0785497	5.70311	1.60376	0.0006*	-10.9346	3.65214	0.00356434	0.906661
	Iowa	98	1.26503	0.284521	<0.0001*	-8.95304	2.53191	0.0006*	22.7185	5.61306	0.0001*	0.831926
	Kansas	62	0.691414	0.160133	<0.0001*	-3.76883	1.3965	0.00906356	11.0406	3.03557	0.0006*	0.896277
	Kentucky	114	-0.204324	0.216147	0.346559	4.7371	1.8875	0.0135253	-8.69838	4.11302	0.0366813	0.830682
	Louisiana	52	-0.513405	0.279724	0.0725191	7.47384	2.56211	0.00531924	-14.6443	5.84138	0.0155421	0.886732
	Maine	16	-0.140952	1.27017	0.913334	4.50804	11.9004	0.710939	-9.7107	27.8112	0.732556	0.869935
	Maryland	23	-1.26195	0.464286	0.013244	15.0945	4.52334	0.00328472	-33.819	10.944	0.00577185	0.901383
	Massachusetts	14	0.0880647	0.176848	0.628311	1.37562	1.67992	0.430251	0.497043	3.92403	0.90149	0.969227
	Michigan	72	0.156775	0.0725178	0.0340981	0.819777	0.675159	0.228811	1.62427	1.56257	0.302207	0.96179
	Minnesota	69	-0.0168497	0.191854	0.930281	2.54045	1.77313	0.156651	-2.65181	4.07238	0.517198	0.852338
	Mississippi	65	1.70363	0.481897	0.0008*	-12.2358	4.20274	0.00499411	28.8543	9.15236	0.00249328	0.777389
	Missouri	114	-0.0559341	0.152012	0.713606	3.17262	1.37339	0.0227338	-4.69738	3.08718	0.130959	0.880918
	Nebraska	44	0.344586	0.223532	0.130867	-0.795989	1.99931	0.692598	4.78585	4.43825	0.287195	0.885659
	Nevada	12	-0.0701528	0.512783	0.894194	2.98578	4.26184	0.501271	-2.90269	8.77479	0.748368	0.825004
	New Hampshire	10	1.3593	0.883653	0.167871	-10.087	8.34869	0.266192	26.1238	19.6714	0.225838	0.950821
	New Jersey	21	-0.850135	0.47139	0.0880802	10.6559	4.78222	0.0388543	-22.0563	12.0835	0.0845919	0.902868
	New York	60	-0.0194181	0.141821	0.891577	2.94345	1.42753	0.0437861	-4.8822	3.57758	0.177721	0.916836
	North Carolina	90	-0.38493	0.189356	0.0451171	6.45965	1.67932	0.0002*	-12.6002	3.7135	0.0010*	0.932858
	Ohio	88	-0.640615	0.163667	0.0002*	8.98257	1.59606	<0.0001*	-19.1525	3.86938	<0.0001*	0.930878
	Oregon	22	-0.493057	0.270171	0.0837672	7.0515	2.50673	0.0111039	-12.9541	5.78232	0.0372205	0.937214
	Pennsylvania	66	-0.173953	0.135049	0.202431	4.29232	1.30049	0.00159149	-7.51698	3.11999	0.018918	0.925191
	Rhode Island	5	-0.333267	0.577825	0.622367	5.26705	5.74804	0.456229	-8.13293	14.1972	0.624561	0.959664
	South Carolina	31	-1.83966	1.01303	0.0800926	20.5436	9.51896	0.0396378	-46.7867	22.3058	0.0450996	0.881467
	Tennessee	85	0.0377694	0.196445	0.84801	2.42625	1.76306	0.172518	-3.24391	3.94516	0.41332	0.864416
	Texas	141	0.092917	0.0648487	0.154168	1.61605	0.587245	0.00672105	-0.52239	1.32238	0.693425	0.936161
	Vermont	14	1.212	0.696452	0.109678	-7.82824	5.8156	0.205363	18.6653	12.0817	0.150633	0.878902
	Virginia	101	-0.0452273	0.298676	0.879951	3.42882	2.60587	0.191309	-6.0176	5.66748	0.290947	0.792856
	West Virginia	53	0.0836906	0.45328	0.854263	1.94895	3.98238	0.626703	-2.31374	8.718	0.791794	0.832434
	Wisconsin	58	-0.149522	0.229305	0.517075	4.11773	2.14126	0.0596585	-7.2848	4.98498	0.14961	0.876264
density	Alabama	63	0.121713	0.448671	0.787111	2.47602	1.16827	0.0382039	-1.40143	0.73616	0.0617482	0.801207
	Arkansas	61	0.0597778	0.244227	0.807503	2.51113	0.546516	<0.0001*	-1.17441	0.293995	0.0002*	0.918286
	California	49	-0.147601	0.0216266	<0.0001*	2.49656	0.0620838	<0.0001*	-0.331299	0.0428284	<0.0001*	0.99235
	Connecticut	8	-0.534283	0.992423	0.613419	4.47941	3.888	0.301367	-2.95368	3.71549	0.462683	0.967652
	Florida	39	-0.0440639	0.225055	0.845874	2.6262	0.564003	<0.0001*	-0.784258	0.324699	0.020924	0.921674
	Georgia	130	0.0452384	0.158735	0.776114	2.49388	0.461776	<0.0001*	-1.19954	0.315204	0.0002*	0.858039
	Illinois	102	-0.303744	0.103487	0.00414545	3.72568	0.356945	<0.0001*	-2.42122	0.283316	<0.0001*	0.936223
	Indiana	92	-0.291681	0.236166	0.220055	3.7903	0.764435	<0.0001*	-2.63402	0.598036	<0.0001*	0.877311
	Iowa	98	1.5274	0.338352	<0.0001*	-1.71583	0.889028	0.0565887	1.25472	0.557546	0.0267277	0.798149
	Kansas	62	0.426612	0.112413	0.0004*	1.12514	0.276938	0.0001*	-0.53028	0.157962	0.00138362	0.906112
	Kentucky	114	-0.362036	0.28852	0.212186	3.82187	0.905609	<0.0001*	-2.4713	0.674259	0.0004*	0.762986
	Louisiana	52	-0.185328	0.146195	0.210905	3.03405	0.442008	<0.0001*	-1.42969	0.311164	<0.0001*	0.891758
	Maine	16	-0.0801003	0.445756	0.860162	2.44012	0.948774	0.0232114	-1.45035	0.448875	0.00656306	0.900504
	Maryland	23	-0.839903	0.140323	<0.0001*	6.23351	0.648169	<0.0001*	-4.90163	0.678699	<0.0001*	0.953046
	Massachusetts	14	-0.365262	0.144957	0.028486	3.85076	0.689291	0.0002*	-2.51643	0.776714	0.00787625	0.96511
	Michigan	72	0.145399	0.0675365	0.0348253	1.86592	0.194303	<0.0001*	-0.56745	0.132727	<0.0001*	0.964544
	Minnesota	69	0.187949	0.111607	0.096902	1.69928	0.320581	<0.0001*	-0.552221	0.208556	0.0101224	0.87821
	Mississippi	65	1.89425	0.534338	0.0008*	-1.81426	1.21722	0.141163	1.10324	0.684552	0.112124	0.732653
	Missouri	114	-0.0106083	0.150677	0.943999	2.64809	0.414089	<0.0001*	-1.38446	0.262613	<0.0001*	0.876407
	Nebraska	44	0.442854	0.166252	0.0109952	1.0264	0.466536	0.0334959	-0.367179	0.28858	0.210413	0.902611
	Nevada	12	-0.143224	0.359305	0.69947	2.3783	0.139126	<0.0001*	0.00748075	0.180861	0.96791	0.963659
	New Hampshire	10	1.629	0.359618	0.00270033	-1.57269	0.917682	0.130295	1.16996	0.557806	0.0741526	0.983727
	New Jersey	21	-0.354124	0.158606	0.0385065	3.62007	0.771485	0.0002*	-1.854	0.892187	0.0522879	0.958736
	New York	60	-0.0730627	0.0549178	0.188684	2.74819	0.249199	<0.0001*	-1.72324	0.251508	<0.0001*	0.950861
	North Carolina	90	-0.232725	0.258424	0.370311	3.51477	0.716078	<0.0001*	-1.97763	0.486847	0.0001*	0.869036
	Ohio	88	-0.806852	0.164841	<0.0001*	5.66844	0.605395	<0.0001*	-4.27074	0.528355	<0.0001*	0.935751
	Oregon	22	-0.203494	0.0838227	0.0253029	2.6993	0.194114	<0.0001*	-0.630696	0.106769	<0.0001*	0.976087
	Pennsylvania	66	-0.15189	0.10239	0.14294	2.9714	0.383128	<0.0001*	-1.65912	0.340927	<0.0001*	0.914044
	Rhode Island	5	-0.263568	0.79648	0.772161	2.96041	3.35086	0.470177	-0.98897	3.46454	0.802143	0.949872
	South Carolina	31	-0.963796	1.01721	0.351494	5.87837	2.78115	0.0435851	-3.79418	1.8579	0.0506535	0.872429
	Tennessee	85	0.0859806	0.269651	0.750644	2.57766	0.771457	0.0013*	-1.49742	0.532905	0.00619451	0.842405
	Texas	141	0.16231	0.0636471	0.011859	2.06597	0.14199	<0.0001*	-0.657676	0.0774302	<0.0001*	0.93436
	Vermont	14	2.20185	0.575672	0.00281943	-1.96688	1.19668	0.128504	0.578797	0.622723	0.372598	0.914941
	Virginia	101	-0.654946	0.118414	<0.0001*	5.21759	0.463933	<0.0001*	-3.70374	0.390629	<0.0001*	0.874529
	West Virginia	53	-0.190655	0.322958	0.557622	3.02169	0.914765	0.00177063	-1.95288	0.619995	0.0027567	0.847257
	Wisconsin	58	0.008004	0.156765	0.959465	2.45391	0.497079	<0.0001*	-1.36221	0.370543	0.0005*	0.877133
