# Supplementary material for: Analyzing and interpreting spatial and temporal variability of the United States county population distributions using Taylor's law
Source: PLoS One. 2019 Dec 11;14(12):e0226096. doi: 10.1371/journal.pone.0226096 (PMC6905577; doi:10.1371/journal.pone.0226096)
Supplement: S21 Table — (XLSX) [file pone.0226096.s073.xlsx]

## Sheet: shtl_diag
Table S21. Diagnostic statistics of the ols linear regression for the spatial hierarchical TL with the minimum number of sampling units requirement (n ≥ 15), using count and density separately. Columns are defined in Table S9
measure	year	no outliers? (Bonf.p)	outlier(s)	normality (Shapiro-Wilk)	homoscedasticity (Breusch-Pagan)	skewness (gvlma)	kurtosis (gvlma)	homoscedasticity (gvlma)	global test (gvlma)
count	1790	0.1735	na	0.204057	0.890139	0.223089	0.902497	0.144814	0.431487
	1800	0.305897	na	0.766532	0.688377	0.474163	0.839618	0.131591	0.183701
	1810	0.0459*	Orleans Territory	0.341372	0.388256	0.242188	0.925842	0.699297	0.0833729
	1820	0.330267	na	0.630655	0.879256	0.33162	0.980509	0.737303	0.301967
	1830	0.446711	na	0.930161	0.795438	0.793082	0.83891	0.471019	0.766346
	1840	0.248169	na	0.221648	0.628087	0.212298	0.75012	0.985562	0.30142
	1850	1	na	0.182322	0.673396	0.616007	0.247722	0.521453	0.190432
	1860	1	na	0.38325	0.122341	0.904409	0.249559	0.405054	0.352455
	1870	1	na	0.203777	0.0730006	0.522977	0.29499	0.39089	0.227226
	1880	1	na	0.0587369	0.313963	0.668772	0.180998	0.0996272	0.027277
	1890	1	na	0.425452	0.228029	0.739381	0.316647	0.194625	0.282398
	1900	1	na	0.694638	0.492066	0.996544	0.396842	0.199146	0.462406
	1910	1	na	0.684097	0.681585	0.923997	0.330484	0.481274	0.825695
	1920	1	na	0.410404	0.475294	0.927999	0.297085	0.533637	0.823038
	1930	0.88176	na	0.567006	0.246427	0.867911	0.361794	0.474232	0.790851
	1940	0.707893	na	0.718267	0.200814	0.859209	0.474538	0.410459	0.817685
	1950	0.514494	na	0.812732	0.162283	0.836969	0.740804	0.466246	0.82439
	1960	0.40444	na	0.932441	0.0972051	0.728955	0.926385	0.768839	0.808965
	1970	0.364518	na	0.932222	0.113353	0.720254	0.915645	0.98915	0.761945
	1980	0.274751	na	0.82057	0.0669573	0.782013	0.541517	0.724519	0.773616
	1990	0.155557	na	0.582586	0.0874262	0.486637	0.397261	0.516895	0.648431
	2000	0.149878	na	0.604823	0.118876	0.466179	0.416143	0.512123	0.752865
	2010	0.169374	na	0.661694	0.175267	0.452888	0.53587	0.463518	0.828297
density	1790	0.47113	na	0.773178	0.756425	0.681051	0.899742	0.920791	0.994545
	1800	1	na	0.485314	0.801289	0.823756	0.393484	0.643305	0.665519
	1810	0.430615	na	0.69451	0.209714	0.662333	0.509864	0.276101	0.661757
	1820	1	na	0.566416	0.690449	0.734277	0.39211	0.180387	0.0816684
	1830	1	na	0.498846	0.713903	0.820437	0.328741	0.0982102	0.0454314
	1840	0.247962	na	0.0264932	0.0519724	0.143198	0.589437	0.166135	0.0108017
	1850	0.762179	na	0.228983	0.310394	0.522079	0.310251	0.765073	0.0400235
	1860	1	na	0.509458	0.37583	0.978095	0.244653	0.604886	0.0446724
	1870	1	na	0.787998	0.282413	0.734573	0.403269	0.219706	0.0271384
	1880	1	na	0.49983	0.720457	0.900809	0.299357	0.405262	0.0629408
	1890	1	na	0.124003	0.620062	0.429678	0.230627	0.592407	0.110564
	1900	1	na	0.362555	0.980457	0.678271	0.282703	0.370234	0.269826
	1910	1	na	0.608761	0.875093	0.781826	0.247306	0.366614	0.454205
	1920	1	na	0.494967	0.849943	0.764313	0.251439	0.442441	0.628601
	1930	1	na	0.290956	0.967122	0.756387	0.239896	0.484535	0.716855
	1940	1	na	0.256719	0.91792	0.846965	0.260614	0.416901	0.71268
	1950	1	na	0.266777	0.786517	0.871433	0.273235	0.535707	0.80602
	1960	1	na	0.474614	0.884493	0.97612	0.2765	0.460857	0.766375
	1970	1	na	0.462674	0.976756	0.968437	0.250703	0.560515	0.791708
	1980	1	na	0.363781	0.933468	0.988779	0.194208	0.731615	0.759499
	1990	1	na	0.394276	0.995209	0.84398	0.205576	0.941266	0.794569
	2000	1	na	0.270034	0.856029	0.833539	0.203844	0.821254	0.788881
	2010	1	na	0.147832	0.994126	0.933948	0.161491	0.979224	0.740923
