# Supplementary material for: Analyzing and interpreting spatial and temporal variability of the United States county population distributions using Taylor's law
Source: PLoS One. 2019 Dec 11;14(12):e0226096. doi: 10.1371/journal.pone.0226096 (PMC6905577; doi:10.1371/journal.pone.0226096)
Supplement: S22 Table — (XLSX) [file pone.0226096.s074.xlsx]

## Sheet: shqtl_c_diag
Table S22. Diagnostic statistics of the ols quadratic regression for the spatial hierarchical QTL with the minimum number of sampling units requirement (n ≥ 15), using count and density separately. Columns are defined in Table S9
measure	year	no outliers? (Bonf.p)	outlier(s)	normality (Shapiro-Wilk)	homoscedasticity (Breusch-Pagan)	skewness (gvlma)	kurtosis (gvlma)	homoscedasticity (gvlma)	global test (gvlma)
count	1790	0.380896	na	0.586675	0.925508	0.366711	0.953684	0.232388	0.649013
	1800	0.646824	na	0.901059	0.998753	0.794326	0.6369	0.895468	0.957279
	1810	0.485304	na	0.364152	0.977499	0.399541	0.591872	0.227301	0.115975
	1820	0.0204*	Louisiana	0.0137479	0.909032	0.0138052	0.0571311	0.964105	0.0453599
	1830	0.196775	na	0.399417	0.698733	0.634658	0.467652	0.89035	0.347156
	1840	0.0283*	Louisiana	0.0965513	0.879607	0.0371797	0.118174	0.442444	0.102366
	1850	0.880113	na	0.0961033	0.605899	0.228886	0.563284	0.584706	0.50808
	1860	1	na	0.197812	0.376121	0.985284	0.198949	0.362561	0.174385
	1870	0.8704	na	0.70189	0.128175	0.368632	0.712226	0.181872	0.46432
	1880	1	na	0.563225	0.211168	0.559596	0.490299	0.0956489	0.442874
	1890	1	na	0.836517	0.480245	0.985222	0.350437	0.14224	0.389078
	1900	0.88292	na	0.672135	0.624829	0.726912	0.323064	0.172255	0.563178
	1910	1	na	0.726434	0.666348	0.979018	0.323302	0.485362	0.761348
	1920	1	na	0.426802	0.513447	0.890728	0.303544	0.520121	0.536722
	1930	0.964317	na	0.648735	0.360522	0.799069	0.389669	0.425654	0.34536
	1940	0.78853	na	0.750654	0.267412	0.770809	0.505337	0.362762	0.499477
	1950	0.599989	na	0.612857	0.214409	0.725375	0.777636	0.374009	0.742857
	1960	0.480248	na	0.831145	0.138629	0.711382	0.886246	0.505467	0.887738
	1970	0.501409	na	0.974861	0.171045	0.801984	0.941734	0.60299	0.937394
	1980	0.383721	na	0.751461	0.0841227	0.859418	0.763463	0.986802	0.992546
	1990	0.268857	na	0.710765	0.0994094	0.553076	0.663414	0.719806	0.949868
	2000	0.182347	na	0.839981	0.135196	0.512248	0.620934	0.627114	0.900258
	2010	0.141555	na	0.685132	0.179797	0.460319	0.571751	0.477905	0.793184
density	1790	0.230456	na	0.703697	0.744184	0.548686	0.960347	0.892181	0.923955
	1800	1	na	0.239962	0.53049	0.686841	0.384854	0.919147	0.861349
	1810	0.459088	na	0.396326	0.662799	0.745116	0.354289	0.255842	0.048495
	1820	0.756184	na	0.848079	0.35958	0.87695	0.493384	0.222834	0.245063
	1830	1	na	0.796262	0.819952	0.722489	0.427392	0.182441	0.636273
	1840	0.0256*	Louisiana	0.0158482	0.452353	0.00964414	0.0675975	0.705606	0.0314661
	1850	0.288479	na	0.277834	0.826526	0.131519	0.979307	0.457169	0.573566
	1860	0.228994	na	0.707557	0.965323	0.240312	0.986606	0.269008	0.56694
	1870	0.309232	na	0.705394	0.748682	0.298806	0.886143	0.242538	0.648237
	1880	0.498355	na	0.524899	0.536806	0.270941	0.94473	0.476669	0.556179
	1890	1	na	0.45546	0.494652	0.737996	0.30742	0.730275	0.613161
	1900	1	na	0.360769	0.813233	0.639581	0.316026	0.413904	0.493072
	1910	1	na	0.540301	0.94327	0.79039	0.268607	0.342086	0.395687
	1920	1	na	0.412535	0.966253	0.991628	0.247534	0.444714	0.345427
	1930	1	na	0.304421	0.917778	0.852801	0.236664	0.493111	0.265725
	1940	1	na	0.299822	0.815683	0.966391	0.261196	0.430065	0.344384
	1950	1	na	0.273901	0.770487	0.891371	0.273805	0.53842	0.468146
	1960	1	na	0.515486	0.991856	0.942705	0.265531	0.530218	0.29258
	1970	1	na	0.453901	0.942315	0.992873	0.256557	0.520039	0.588696
	1980	1	na	0.37406	0.932125	0.954869	0.200087	0.671347	0.765491
	1990	1	na	0.393067	0.978619	0.821005	0.213026	0.8993	0.779134
	2000	1	na	0.268781	0.854148	0.834875	0.202917	0.825263	0.739275
	2010	1	na	0.156568	0.998315	0.94001	0.164906	0.999478	0.646784
