# Supplementary material for: Analyzing and interpreting spatial and temporal variability of the United States county population distributions using Taylor's law
Source: PLoS One. 2019 Dec 11;14(12):e0226096. doi: 10.1371/journal.pone.0226096 (PMC6905577; doi:10.1371/journal.pone.0226096)
Supplement: S23 Table — (XLSX) [file pone.0226096.s075.xlsx]

## Sheet: stl_c_diag
Table S23. Diagnostic statistics of the ols linear regression for the spatial TL with the minimum number of sampling units requirement (n ≥ 15), using count and density separately. Columns are defined in Table S9
measure	state	no outliers? (Bonf.p)	outlier(s)	normality (Shapiro-Wilk)	homoscedasticity (Breusch-Pagan)	1st-order autocorrelation (Durbin-Watson)	skewness (gvlma)	kurtosis (gvlma)	homoscedasticity (gvlma)	global test (gvlma)
count	Alabama	0.166266	na	0.936973	0.0380118	<0.0001*	0.972609	0.61125	0.0600166	0.00874048
	Alaska	0.208776	na	0.695862	0.188721	0.550625	0.633635	0.576087	0.296947	0.784569
	Arkansas	1	na	0.0205009	0.915744	<0.0001*	0.759901	0.161676	0.80486	0.0241598
	California	0.156898	na	0.652443	0.860747	0.0009*	0.34651	0.959025	0.851401	0.0575254
	Colorado	<0.0001*	1880	0.00565223	0.00512765	0.0386131	0.00575275	0.0137959	0.00632087	<0.0001*
	Florida	1	na	0.476739	0.755512	<0.0001*	0.893021	0.285459	0.668272	0.526602
	Georgia	1	na	0.516626	0.394064	<0.0001*	0.885615	0.317306	0.352102	0.52149
	Idaho	0.0111*	1910	0.00154639	0.324829	0.0542291	0.00680948	0.0458889	0.00978236	0.0008*
	Illinois	0.756601	na	0.388738	0.0370506	<0.0001*	0.513372	0.465142	0.0323695	0.0844717
	Indiana	0.545139	na	0.203815	0.0298171	<0.0001*	0.502423	0.495795	0.0199252	0.00313794
	Iowa	1	na	0.221421	0.827445	<0.0001*	0.518574	0.331072	0.902166	0.0358801
	Kansas	0.0039*	1870	0.198323	0.0450234	<0.0001*	0.772857	0.472378	0.10895	0.00345083
	Kentucky	0.0413*	1800	0.00863688	0.140214	0.0006*	0.0249877	0.559425	0.342058	0.0680326
	Louisiana	0.236038	na	0.253165	0.150213	0.0008*	0.223288	0.719283	0.308419	0.00552995
	Maine	1	na	0.0370262	0.929967	<0.0001*	0.814543	0.197331	0.933648	0.00373801
	Maryland	1	na	0.0250668	0.357986	<0.0001*	0.546797	0.176085	0.318655	<0.0001*
	Michigan	1	na	0.105933	0.323186	<0.0001*	0.390302	0.368036	0.400298	0.583395
	Minnesota	0.0542962	na	0.685451	0.0083186	0.00783452	0.508352	0.793828	0.019085	0.0180046
	Mississippi	1	na	0.0184037	0.357265	<0.0001*	0.787465	0.158532	0.415424	0.0105944
	Missouri	0.892939	na	0.575593	0.0206699	0.00232207	0.804091	0.448518	0.120578	0.0442781
	Montana	0.0028*	1910	0.00400982	0.351972	0.0392413	0.00536963	0.0166745	0.0766696	0.00216817
	Nebraska	0.0014*	1870	0.244212	0.14089	0.00251646	0.787782	0.273591	0.265605	0.00446319
	Nevada	0.188279	na	0.486071	0.631041	0.00238175	0.418971	0.948942	0.57066	0.32503
	New Jersey	1	na	0.125219	0.876305	<0.0001*	0.86405	0.20935	0.942194	0.0010*
	New Mexico	1	na	0.265429	0.902189	0.0007*	0.818597	0.337521	0.922035	0.0493211
	New York	1	na	0.0148807	0.634358	<0.0001*	0.425701	0.208508	0.658132	0.0010*
	North Carolina	1	na	0.770981	0.151706	0.0001*	0.861537	0.367163	0.17217	0.0274373
	North Dakota	1	na	0.514847	0.409841	<0.0001*	0.871647	0.32924	0.503198	0.68308
	Ohio	0.815206	na	0.458801	0.63825	<0.0001*	0.991496	0.368751	0.669671	0.872512
	Oklahoma	0.867706	na	0.153612	0.443186	<0.0001*	0.413922	0.475276	0.706361	0.263061
	Oregon	1	na	0.373764	0.670797	<0.0001*	0.997499	0.32798	0.57728	0.0386138
	Pennsylvania	0.0203*	1790	0.0134882	0.325228	<0.0001*	0.0216746	0.336024	0.337055	0.0008*
	South Carolina	0.516436	na	0.170492	0.392022	<0.0001*	0.375072	0.858707	0.338501	0.00773692
	South Dakota	0.0465*	1890	0.077092	0.600792	<0.0001*	0.86175	0.241726	0.541096	0.0310303
	Tennessee	0.75815	na	0.859389	0.193818	<0.0001*	0.967979	0.423918	0.200098	0.648381
	Texas	0.985759	na	0.892757	0.769025	<0.0001*	0.915755	0.415549	0.800362	0.840335
	Utah	0.152204	na	0.346291	0.65367	<0.0001*	0.279295	0.779132	0.630078	0.0101894
	Virginia	<0.0001*	1790	<0.0001*	0.852058	0.00432876	<0.0001*	<0.0001*	<0.0001*	<0.0001*
	Washington	0.984933	na	0.15492	0.719374	<0.0001*	0.755472	0.29448	0.592151	0.0206456
	West Virginia	0.10345	na	0.87367	0.0297182	<0.0001*	0.980968	0.737142	0.0459923	0.00433931
	Wisconsin	1	na	0.380613	0.320519	<0.0001*	0.859181	0.309079	0.307972	0.349855
	Wyoming	0.679256	na	0.63352	0.479243	0.0035884	0.626099	0.740253	0.584495	0.0488324
density	Alabama	0.149715	na	0.563331	0.0679257	<0.0001*	0.958693	0.534965	0.105561	0.00161306
	Alaska	0.450615	na	0.861348	0.425714	0.0005*	0.639548	0.669023	0.290512	0.460636
	Arkansas	0.891324	na	0.0346531	0.782203	<0.0001*	0.997538	0.166118	0.8093	0.0123095
	California	0.0002*	1850	0.0134805	0.107445	<0.0001*	0.336483	0.313691	0.648613	0.00136884
	Colorado	0.150669	na	0.365944	0.186789	<0.0001*	0.229225	0.997056	0.0885419	0.0338399
	Florida	1	na	0.37429	0.862089	<0.0001*	0.64712	0.33323	0.864067	0.882166
	Georgia	0.157988	na	0.642901	0.575434	0.0004*	0.586275	0.750712	0.608686	0.527124
	Idaho	0.0359*	1890	0.92909	0.0779294	<0.0001*	0.943854	0.761202	0.0925928	0.0105429
	Illinois	0.360564	na	0.172612	0.030221	<0.0001*	0.148497	0.891682	0.0103069	0.00286634
	Indiana	0.870965	na	0.125786	0.0450826	<0.0001*	0.424417	0.447189	0.0263676	0.00254599
	Iowa	1	na	0.257079	0.752375	<0.0001*	0.534844	0.333617	0.978659	0.0433141
	Kansas	0.25789	na	0.629352	0.0564185	0.00937178	0.606312	0.570311	0.136026	0.589884
	Kentucky	0.0412*	1800	0.368682	0.0150807	<0.0001*	0.177539	0.97784	0.0593207	0.0010*
	Louisiana	0.0323*	1820	0.0017021	0.282873	<0.0001*	0.0369552	0.905444	0.897288	0.0003*
	Maine	1	na	0.126151	0.532872	<0.0001*	0.958177	0.240081	0.507103	0.00472105
	Maryland	1	na	0.0460968	0.32358	<0.0001*	0.249323	0.365916	0.778923	0.0110176
	Michigan	1	na	0.134237	0.265352	<0.0001*	0.387756	0.398462	0.328074	0.504536
	Minnesota	0.809427	na	0.00578106	0.436283	0.00427359	0.211089	0.420564	0.62271	0.482509
	Mississippi	1	na	0.135182	0.241423	<0.0001*	0.805201	0.20595	0.289907	0.0063457
	Missouri	0.69595	na	0.801157	0.672468	0.0001*	0.578282	0.534048	0.317751	0.757997
	Montana	0.238314	na	0.162911	0.866083	0.0004*	0.249058	0.771696	0.186102	0.195483
	Nebraska	<0.0001*	1870	0.512812	0.00132298	0.0964613	0.526162	0.959384	0.0109149	0.00227732
	Nevada	0.638666	na	0.73817	0.298697	0.00140557	0.926686	0.424877	0.729196	0.0210102
	New Jersey	0.288374	na	0.0489762	0.166391	<0.0001*	0.643022	0.263178	0.32889	0.0007*
	New Mexico	0.495448	na	0.205243	0.814371	<0.0001*	0.669027	0.393243	0.790168	0.0357746
	New York	0.0297*	1790	0.169451	0.0438844	<0.0001*	0.183795	0.60612	0.0351311	0.0003*
	North Carolina	0.52948	na	0.420404	0.0451097	<0.0001*	0.992785	0.418403	0.0489424	0.0010*
	North Dakota	1	na	0.398037	0.411849	<0.0001*	0.695398	0.360318	0.329426	0.449303
	Ohio	0.0816748	na	0.962927	0.0199841	<0.0001*	0.785736	0.999871	0.0501086	0.0957509
	Oklahoma	0.896368	na	0.166384	0.531993	<0.0001*	0.443165	0.474854	0.808316	0.162641
	Oregon	0.600503	na	0.11795	0.670376	<0.0001*	0.698686	0.252726	0.797515	0.00334703
	Pennsylvania	0.411638	na	0.0412273	0.999107	<0.0001*	0.167382	0.543972	0.666922	0.0031389
	South Carolina	1	na	0.182779	0.450916	<0.0001*	0.527022	0.286719	0.464405	0.00267217
	South Dakota	0.111752	na	0.0611551	0.997573	<0.0001*	0.893884	0.235342	0.820643	0.0796193
	Tennessee	1	na	0.40036	0.254417	<0.0001*	0.982718	0.256145	0.261184	0.0259533
	Texas	0.652504	na	0.971536	0.589631	<0.0001*	0.896705	0.525786	0.637583	0.326874
	Utah	0.0131*	1900	0.0292857	0.153123	0.0002*	0.079307	0.686498	0.169253	0.0029634
	Virginia	0.933072	na	0.0196228	0.0318829	0.0157071	0.222326	0.640315	0.00934847	0.0002*
	Washington	1	na	0.0223172	0.711547	<0.0001*	0.745933	0.23506	0.829352	0.00998551
	West Virginia	1	na	0.349962	0.572698	<0.0001*	0.835003	0.32635	0.295691	0.233181
	Wisconsin	1	na	0.132596	0.458703	<0.0001*	0.644913	0.266516	0.396754	0.0899333
	Wyoming	0.708325	na	0.891291	0.164252	0.0828449	0.893469	0.506842	0.123784	0.573623
