# Supplementary material for: Analyzing and interpreting spatial and temporal variability of the United States county population distributions using Taylor's law
Source: PLoS One. 2019 Dec 11;14(12):e0226096. doi: 10.1371/journal.pone.0226096 (PMC6905577; doi:10.1371/journal.pone.0226096)
Supplement: S24 Table — (XLSX) [file pone.0226096.s076.xlsx]

## Sheet: sqtl_c_diag
Table S24. Diagnostic statistics of the ols quadratic regression for the spatial QTL with the minimum number of sampling units requirement (n ≥ 15), using count and density separately. Columns are defined in Table S9
measure	state	no outliers? (Bonf.p)	outlier(s)	normality (Shapiro-Wilk)	homoscedasticity (Breusch-Pagan)	1st-order autocorrelation (Durbin-Watson)	skewness (gvlma)	kurtosis (gvlma)	homoscedasticity (gvlma)	global test (gvlma)
count	Alabama	0.713603	na	0.750553	0.128199	<0.0001*	0.693575	0.378768	0.139235	0.0511214
	Alaska	0.262916	na	0.943179	0.112224	0.294893	0.664998	0.673608	0.193762	0.0968033
	Arkansas	1	na	0.335041	0.825945	0.0001*	0.583522	0.383558	0.848223	0.647181
	California	0.0478*	1860	0.275185	0.00961514	0.318005	0.310217	0.541806	0.0152092	0.00407876
	Colorado	0.0004*	1880, 1890	0.0233655	<0.0001*	0.329615	0.803013	0.072077	0.0006*	0.0018427
	Florida	1	na	0.268968	0.375815	<0.0001*	0.629136	0.311226	0.374613	0.00782939
	Georgia	1	na	0.277398	0.956169	<0.0001*	0.700918	0.281316	0.918473	0.0116049
	Idaho	0.0267*	1910	0.00243406	0.550279	0.00895449	0.0117387	0.151134	0.0398552	0.00746005
	Illinois	1	na	0.024666	0.658176	<0.0001*	0.785289	0.168334	0.630321	0.0006*
	Indiana	1	na	0.332978	0.616245	<0.0001*	0.861842	0.272414	0.612486	0.0172769
	Iowa	0.0273*	1850	0.978847	0.0794839	0.0010*	0.926084	0.556123	0.105758	0.00161639
	Kansas	1	na	0.230754	0.423397	<0.0001*	0.812824	0.315071	0.466067	0.439612
	Kentucky	0.117749	na	0.182937	0.729311	0.0001*	0.293547	0.752357	0.506073	0.0216239
	Louisiana	0.77145	na	0.640385	0.153426	0.143624	0.758233	0.684548	0.162895	0.671241
	Maine	1	na	0.638922	0.73284	0.205329	0.803552	0.555121	0.74485	0.798035
	Maryland	0.437048	na	0.080186	0.487952	0.0004*	0.132156	0.833139	0.624534	0.00526019
	Michigan	1	na	0.108276	0.708977	<0.0001*	0.554268	0.260341	0.84806	0.0056577
	Minnesota	0.536357	na	0.168045	0.899975	0.00426441	0.302235	0.56015	0.825728	0.0474384
	Mississippi	1	na	0.211238	0.983921	<0.0001*	0.831051	0.231679	0.897682	0.0783605
	Missouri	0.153477	na	0.259123	0.0294318	0.0467397	0.797638	0.959217	0.029361	0.259329
	Montana	0.0007*	1910	0.0011*	0.262977	0.0273025	0.00174877	0.00337082	0.0605988	0.0002*
	Nebraska	1	na	0.330943	0.568196	0.0001*	0.7511	0.332526	0.997207	0.889449
	Nevada	0.0191*	1910	0.0427289	0.0682584	0.072824	0.0581261	0.0491676	0.0222316	0.0065844
	New Jersey	1	na	0.0851053	0.227074	0.0003*	0.90082	0.231139	0.293001	0.00489648
	New Mexico	0.0354*	1940	0.082585	0.178353	0.753474	0.0905076	0.420845	0.191305	0.21006
	New York	0.702433	na	0.774073	0.0581422	<0.0001*	0.52588	0.837218	0.0420699	0.0002*
	North Carolina	1	na	0.103746	0.909885	0.00269818	0.870922	0.230201	0.958431	0.0574824
	North Dakota	1	na	0.300157	0.212684	<0.0001*	0.888838	0.355076	0.563025	0.875991
	Ohio	1	na	0.553111	0.957201	<0.0001*	0.981309	0.34498	0.936781	0.00344378
	Oklahoma	1	na	0.676113	0.463145	0.0006*	0.958163	0.538302	0.225594	0.688196
	Oregon	0.0031*	1880	0.0127624	0.00808891	0.0181735	0.0175654	0.00812714	0.00569394	<0.0001*
	Pennsylvania	0.0022*	1790	0.0358975	0.00166813	0.00169059	0.0117717	0.0145163	0.00542432	<0.0001*
	South Carolina	0.46838	na	0.833542	0.418976	<0.0001*	0.508239	0.667749	0.259089	0.0556923
	South Dakota	0.541154	na	0.840557	0.558329	0.0007*	0.438581	0.755546	0.924504	0.94136
	Tennessee	0.760979	na	0.697334	0.403189	<0.0001*	0.862529	0.328022	0.405001	0.0044841
	Texas	1	na	0.880094	0.309205	<0.0001*	0.99834	0.424663	0.320488	0.0975703
	Utah	0.772289	na	0.983566	0.738559	0.159976	0.960693	0.601544	0.727911	0.181637
	Virginia	<0.0001*	1790	<0.0001*	0.948714	0.0003*	<0.0001*	<0.0001*	<0.0001*	<0.0001*
	Washington	0.666113	na	0.890453	0.641495	0.0700934	0.787226	0.887361	0.502105	0.12059
	West Virginia	0.123077	na	0.103159	0.195452	0.111762	0.0724412	0.506815	0.320487	0.243337
	Wisconsin	1	na	0.15781	0.698692	<0.0001*	0.755433	0.245451	0.684553	0.00756517
	Wyoming	0.498648	na	0.0694372	0.923024	0.158805	0.505755	0.409193	0.755676	0.286263
density	Alabama	1	na	0.878824	0.108289	<0.0001*	0.976808	0.446409	0.104197	0.280197
	Alaska	0.601587	na	0.685243	0.28481	0.0108569	0.5143	0.757299	0.162587	0.435263
	Arkansas	1	na	0.395113	0.520954	<0.0001*	0.730142	0.376833	0.635703	0.488966
	California	0.0100*	1850	0.509814	0.814789	<0.0001*	0.981159	0.336334	0.997093	0.0120051
	Colorado	1	na	0.113836	0.669777	0.0003*	0.486529	0.349435	0.201023	0.303166
	Florida	1	na	0.374919	0.858053	<0.0001*	0.646777	0.333589	0.859861	0.00394213
	Georgia	0.298432	na	0.879413	0.384859	0.0005*	0.820254	0.979868	0.370861	0.0151293
	Idaho	0.514614	na	0.78242	0.841226	0.0001*	0.526377	0.627407	0.928034	0.204528
	Illinois	1	na	0.100521	0.770146	<0.0001*	0.678076	0.23243	0.962143	0.0321675
	Indiana	1	na	0.226408	0.600724	<0.0001*	0.826689	0.270279	0.603745	0.0514758
	Iowa	0.0584414	na	0.947466	0.132955	0.0004*	0.813405	0.497138	0.155025	0.00211267
	Kansas	0.0038*	1870	0.649103	0.0512401	0.0037266	0.608719	0.575682	0.126718	0.00296639
	Kentucky	0.534799	na	0.276331	0.0862414	<0.0001*	0.639648	0.858811	0.0500639	0.0266426
	Louisiana	0.0345*	2010	0.282415	0.0786291	<0.0001*	0.215343	0.378591	0.0120284	0.0339974
	Maine	0.581623	na	0.817834	0.87319	<0.0001*	0.618371	0.711584	0.865444	0.0127242
	Maryland	0.550558	na	0.788108	0.182942	<0.0001*	0.711108	0.890369	0.0957766	0.203633
	Michigan	1	na	0.136213	0.695304	<0.0001*	0.593935	0.258288	0.839449	0.00658727
	Minnesota	0.0016*	1860	0.101306	0.0380423	0.0111084	0.195403	0.736074	0.115023	0.0008*
	Mississippi	1	na	0.0521287	0.852793	<0.0001*	0.401835	0.281526	0.972284	0.0407495
	Missouri	0.787423	na	0.984697	0.531336	<0.0001*	0.674591	0.677934	0.275618	0.486611
	Montana	0.0662466	na	0.110799	0.270741	0.0003*	0.0787309	0.41055	0.281545	0.223242
	Nebraska	0.0557848	na	0.75945	0.665712	0.0301412	0.554559	0.642163	0.918061	0.0312407
	Nevada	0.442848	na	0.941267	0.808821	0.357112	0.556176	0.834072	0.364386	0.123728
	New Jersey	1	na	0.632151	0.187418	<0.0001*	0.615129	0.400194	0.323757	0.105645
	New Mexico	0.419188	na	0.665247	0.175387	0.331027	0.759072	0.532954	0.273244	0.718531
	New York	0.0057*	1790	0.209265	0.0164559	0.0007*	0.0943467	0.125853	0.0250147	0.0156302
	North Carolina	0.795603	na	0.300696	0.630253	<0.0001*	0.302994	0.486496	0.586472	0.0011*
	North Dakota	0.0806136	na	0.859854	0.23476	<0.0001*	0.864398	0.41973	0.608288	0.304455
	Ohio	0.713613	na	0.612688	0.882605	<0.0001*	0.850091	0.417988	0.81041	0.00515423
	Oklahoma	1	na	0.655087	0.44281	0.00123344	0.989945	0.506656	0.216754	0.569445
	Oregon	0.0026*	1880	0.00790685	0.0436979	0.20466	0.00587239	0.0179413	0.0402703	0.0001*
	Pennsylvania	0.853856	na	0.159464	0.803775	<0.0001*	0.295615	0.509594	0.246158	0.297881
	South Carolina	1	na	0.897537	0.4115	<0.0001*	0.959081	0.388318	0.35489	0.559536
	South Dakota	0.949766	na	0.974806	0.555781	<0.0001*	0.760307	0.623862	0.771635	0.954221
	Tennessee	0.545806	na	0.959785	0.0896018	<0.0001*	0.871756	0.447901	0.0877663	0.018115
	Texas	0.926414	na	0.760385	0.206722	<0.0001*	0.749424	0.521852	0.200233	0.152014
	Utah	0.0284*	1900	0.742764	0.13057	0.0011*	0.872606	0.430399	0.150842	0.0338983
	Virginia	0.0036*	1900	0.0305742	0.0879191	0.0005*	0.0390953	0.0954037	0.421305	0.00190082
	Washington	0.797265	na	0.830497	0.314585	0.273271	0.654761	0.506473	0.237422	0.380465
	West Virginia	1	na	0.784267	0.123447	0.0002*	0.994592	0.765631	0.0175289	0.217588
	Wisconsin	0.0239*	1850	0.797383	0.140069	<0.0001*	0.590781	0.504339	0.264641	0.00159423
	Wyoming	0.0192*	1910	0.910959	0.24717	0.0253373	0.979553	0.513437	0.187766	0.0910349
