# Supplementary material for: Analyzing and interpreting spatial and temporal variability of the United States county population distributions using Taylor's law
Source: PLoS One. 2019 Dec 11;14(12):e0226096. doi: 10.1371/journal.pone.0226096 (PMC6905577; doi:10.1371/journal.pone.0226096)
Supplement: S25 Table — (XLSX) [file pone.0226096.s077.xlsx]

## Sheet: ttl_c_diag
Table S25. Diagnostic statistics of the ols linear regression for the temporal TL with the minimum number of sampling units requirement (n ≥ 15), using count and density separately. Columns are defined in Table S9
measure	state	no outliers? (Bonf.p)	outlier(s)	normality (Shapiro-Wilk)	homoscedasticity (Breusch-Pagan)	skewness (gvlma)	kurtosis (gvlma)	homoscedasticity (gvlma)	global test (gvlma)
count	Alabama	1		0.823734	0.550093	0.968534	0.546259	0.458077	0.57909
	Arkansas	0.0853084		0.370866	0.0392387	0.957929	0.0773937	0.546027	0.424847
	California	0.0007*	San Francisco County	0.0004*	0.166517	<0.0001*	<0.0001*	0.908673	<0.0001*
	Connecticut	0.208148		0.917637	0.0633222	0.751238	0.846006	0.0855038	0.283175
	Florida	0.141119		0.0462287	0.148731	0.0290511	0.171474	0.981126	0.104842
	Georgia	1		0.364865	0.906856	0.622412	0.185726	0.887922	0.688263
	Illinois	0.0880706		0.793615	0.0117007	0.604349	0.146322	0.0525486	0.0892945
	Indiana	0.148387		0.115496	0.159232	0.282269	0.103239	0.105039	0.047741
	Iowa	0.0369*	Jefferson County	0.00294104	0.343998	0.0012*	0.14056	0.957383	<0.0001*
	Kansas	0.235101		0.938298	0.0275716	0.722603	0.582361	0.588674	0.00359336
	Kentucky	0.149054		0.0915844	0.64453	0.0620818	0.122411	0.355122	0.106004
	Louisiana	0.356441		0.338029	0.453936	0.969205	0.599789	0.176861	0.244554
	Maine	0.0283*	Lincoln County	0.184118	0.133227	0.0821326	0.186789	0.96647	0.310421
	Maryland	0.447853		0.330761	0.615942	0.272984	0.922563	0.640666	0.105978
	Massachusetts	0.188992		0.665761	0.201266	0.657953	0.679514	0.108107	0.515772
	Michigan	0.66103		0.701704	0.838005	0.871086	0.729191	0.663548	0.297397
	Minnesota	0.192828		0.742538	0.489504	0.296497	0.633057	0.954911	0.856422
	Mississippi	0.534001		0.630468	0.410801	0.633829	0.725946	0.70837	0.0224722
	Missouri	0.930018		0.88451	0.542172	0.838503	0.923208	0.921831	0.995351
	Nebraska	0.0222*	Sarpy County	0.255777	0.111432	0.518133	0.103225	0.0573325	0.0587427
	Nevada	0.239206		0.154225	0.204779	0.257567	0.829703	0.490683	0.767359
	New Hampshire	1		0.447433	0.885631	0.936994	0.343429	0.986595	0.488525
	New Jersey	1		0.0850306	0.902828	0.762632	0.223619	0.249384	0.190881
	New York	0.337694		0.369032	0.118875	0.159034	0.88164	0.0301532	0.151106
	North Carolina	0.0729532		0.0422977	0.00169009	0.712039	0.112889	0.197039	0.0781399
	Ohio	0.0066*	Harrison County	0.0160766	0.385297	0.1319	0.0003*	0.859384	<0.0001*
	Oregon	0.724255		0.211346	0.143997	0.457267	0.692636	0.775027	0.396379
	Pennsylvania	0.0344*	Montour County	0.0122547	0.00156425	0.159625	0.0006*	0.63958	0.00333775
	Rhode Island	1		0.905491	0.801286	0.923164	0.662237	0.694208	0.899359
	South Carolina	0.0678811		0.258604	0.636439	0.284956	0.306917	0.152157	0.111526
	Tennessee	1		0.142943	0.69029	0.33801	0.157417	0.213909	0.342559
	Texas	0.551593		0.199052	0.967824	0.972011	0.258389	0.444354	0.415494
	Vermont	0.0066*	Chittenden County	0.0950794	0.0404798	0.0790477	0.178713	0.31742	0.0632719
	Virginia	0.0522508		0.1925	0.165566	0.0433516	0.350541	0.0690453	0.0817665
	West Virginia	0.0704555		0.0228042	0.420126	0.0267012	0.335433	0.443689	0.167285
	Wisconsin	0.119085		0.124854	0.206975	0.0433837	0.487696	0.755378	0.276792
density	Alabama	0.195611		0.801311	0.0506817	0.750408	0.689194	0.0913366	0.526713
	Arkansas	0.26433		0.670914	0.0690343	0.681956	0.334242	0.821525	0.875763
	California	<0.0001*	San Francisco County	0.0002*	<0.0001*	<0.0001*	<0.0001*	0.900896	<0.0001*
	Connecticut	0.061822		0.167856	0.147279	0.241415	0.764054	0.0447982	0.20467
	Florida	0.0448*	Jefferson County	0.00265741	0.27229	0.00289117	0.137499	0.841184	0.0247996
	Georgia	1		0.59175	0.351176	0.945939	0.177051	0.971379	0.752092
	Illinois	0.0105*	Cook County	0.156048	0.0007*	0.175164	0.0829072	0.236565	0.00609161
	Indiana	0.0084*	Union County	0.00364639	0.4334	0.00337563	<0.0001*	0.032668	<0.0001*
	Iowa	0.0286*	Jefferson County	0.00184807	0.0165216	0.0007*	0.0837689	0.803826	<0.0001*
	Kansas	0.100352		0.7718	0.0020177	0.412581	0.975254	0.612223	0.0108237
	Kentucky	0.213178		0.176216	0.459495	0.0374347	0.614263	0.549577	0.162469
	Louisiana	0.606009		0.547979	0.143859	0.345183	0.998929	0.412531	0.522703
	Maine	0.134738		0.367643	0.481536	0.550566	0.812342	0.452043	0.90708
	Maryland	0.0011*	Baltimore city	0.0174215	0.0953623	0.130723	0.620014	0.449706	0.0013*
	Massachusetts	0.224126		0.547469	0.537406	0.36299	0.895413	0.751061	0.194052
	Michigan	0.661112		0.950702	0.939273	0.654831	0.862379	0.780533	0.304155
	Minnesota	0.340683		0.581145	0.324618	0.265836	0.958587	0.875684	0.391592
	Mississippi	1		0.492481	0.923186	0.531341	0.523003	0.338743	0.0130071
	Missouri	0.306278		0.268662	0.414842	0.266341	0.153309	0.302277	0.361482
	Nebraska	0.0525292		0.851722	0.139772	0.603613	0.56234	0.214099	0.0707523
	Nevada	0.368435		0.271226	0.133071	0.832222	0.796767	0.0546414	0.404333
	New Hampshire	0.529037		0.663603	0.779911	0.678256	0.677972	0.177098	0.0472874
	New Jersey	0.783979		0.304943	0.470136	0.556731	0.373774	0.151494	0.101251
	New York	0.653733		0.368395	0.562825	0.161339	0.759278	0.00660288	0.0239902
	North Carolina	0.3211		0.0398375	0.0339595	0.245135	0.600434	0.148992	0.337958
	Ohio	0.0098*	Harrison County	0.0182846	0.798023	0.0387997	0.0004*	0.654492	<0.0001*
	Oregon	0.16873		0.426756	0.597681	0.445432	0.548376	0.507298	0.159167
	Pennsylvania	0.0488*	Montour County	0.0008*	0.272912	0.00214028	0.0265548	0.798097	0.00227261
	Rhode Island	0.529038		0.593983	0.834984	0.486445	0.782537	0.531914	0.876309
	South Carolina	0.365445		0.46556	0.597449	0.397	0.719537	0.257534	0.542657
	Tennessee	0.842258		0.181553	0.324392	0.117688	0.447084	0.0590379	0.152892
	Texas	0.0172*	Marion County	0.0306501	0.68828	0.351397	0.563645	0.848397	0.108061
	Vermont	0.0044*	Chittenden County	0.0876674	0.129718	0.111672	0.550908	0.59283	0.0247886
	Virginia	1		0.013247	0.00450217	0.364192	0.0872448	0.30945	<0.0001*
	West Virginia	0.119608		0.0614128	0.902348	0.034659	0.660434	0.229671	0.167031
	Wisconsin	0.283764		0.0145873	0.177322	0.0253117	0.876364	0.840466	0.280199
