# Supplementary material for: Analyzing and interpreting spatial and temporal variability of the United States county population distributions using Taylor's law
Source: PLoS One. 2019 Dec 11;14(12):e0226096. doi: 10.1371/journal.pone.0226096 (PMC6905577; doi:10.1371/journal.pone.0226096)
Supplement: S26 Table — (XLSX) [file pone.0226096.s078.xlsx]

## Sheet: tqtl_c_diag
Table S26. Diagnostic statistics of the ols quadratic regression for the temporal QTL with the minimum number of sampling units requirement (n ≥ 15), using count and density separately. Columns are defined in Table S9
measure	state	no outliers? (Bonf.p)	outlier(s)	normality (Shapiro-Wilk)	homoscedasticity (Breusch-Pagan)	skewness (gvlma)	kurtosis (gvlma)	homoscedasticity (gvlma)	global test (gvlma)
count	Alabama	1	na	0.712421	0.210651	0.961608	0.560771	0.678023	0.84224
	Arkansas	0.108251	na	0.28221	0.0160751	0.806104	0.0780726	0.61832	0.0581328
	California	0.0010*	San Francisco County	0.0003*	0.641658	<0.0001*	<0.0001*	0.72096	<0.0001*
	Connecticut	0.106794	na	0.464121	0.0965533	0.327757	0.902401	0.0227736	0.0802366
	Florida	0.126343	na	0.00867229	0.0796626	0.00692145	0.0756206	0.989224	0.016856
	Georgia	1	na	0.280746	0.704752	0.629102	0.157092	0.933684	0.103579
	Illinois	0.0037*	Cook County	0.773111	0.47766	0.277174	0.399149	0.0961551	0.0005*
	Indiana	0.110159	na	0.229677	0.0265215	0.424779	0.146824	0.147763	0.210352
	Iowa	0.0203*	Jefferson County	0.0100419	0.319	0.00196004	0.0102479	0.707098	0.0002*
	Kansas	1	na	0.302865	0.431095	0.455081	0.550957	0.816254	0.638927
	Kentucky	0.120459	na	0.0735963	0.718642	0.0485605	0.0698076	0.414982	0.00398443
	Louisiana	0.886205	na	0.685792	0.283815	0.654797	0.942135	0.36484	0.0928546
	Maine	0.0420*	Lincoln County	0.214904	0.140256	0.0902433	0.199895	0.972825	0.325471
	Maryland	0.145106	na	0.475891	0.0195298	0.898884	0.331618	0.793629	0.812499
	Massachusetts	0.270887	na	0.598058	0.222255	0.860825	0.697543	0.111833	0.458548
	Michigan	0.133724	na	0.412556	0.276272	0.724697	0.839119	0.456017	0.0554431
	Minnesota	0.195731	na	0.725011	0.516342	0.283468	0.620485	0.953944	0.204765
	Mississippi	0.563754	na	0.65665	0.252557	0.58906	0.883497	0.933646	0.10625
	Missouri	0.934991	na	0.933372	0.721813	0.825263	0.967047	0.950216	0.060217
	Nebraska	0.0042*	Sarpy County	0.0680711	0.0207204	0.0967215	0.00577821	0.070978	<0.0001*
	Nevada	0.336355	na	0.216575	0.178356	0.269956	0.826648	0.491276	0.39909
	New Hampshire	0.603985	na	0.762882	0.634046	0.743254	0.533531	0.300171	0.318959
	New Jersey	0.385543	na	0.280083	0.340973	0.950527	0.342184	0.73383	0.583954
	New York	0.0119*	Hamilton County	0.306326	0.0832878	0.138753	0.929003	0.0328456	0.0006*
	North Carolina	0.0371*	Dare County	0.0273252	0.0012*	0.58491	0.0189039	0.143437	0.0880253
	Ohio	0.0106*	Harrison County	0.0255314	0.012722	0.373971	0.00152967	0.715507	0.0269147
	Oregon	0.0138*	Curry County	0.378934	0.00277185	0.239483	0.339186	0.607517	0.424646
	Pennsylvania	0.0367*	Montour County, Pike County	0.00754312	<0.0001*	0.428912	<0.0001*	0.609873	0.0002*
	Rhode Island	0.732471	na	0.355431	0.709966	0.428617	0.86525	0.763086	0.521316
	South Carolina	0.0165*	Colleton County	0.0344158	0.623566	0.1251	0.0408594	0.178776	0.0181826
	Tennessee	1	na	0.123906	0.767358	0.35408	0.143147	0.213632	0.0331556
	Texas	0.529003	na	0.100774	0.659762	0.704529	0.25908	0.361152	0.199346
	Vermont	0.0422*	Chittenden County	0.698946	0.195968	0.583858	0.533708	0.925703	0.0699474
	Virginia	0.0457*	Warwick County	0.19154	0.152773	0.0422279	0.324317	0.0716711	0.0422939
	West Virginia	0.0793626	na	0.0279192	0.445171	0.0307857	0.356295	0.465144	0.111231
	Wisconsin	0.10788	na	0.153157	0.0670593	0.0586293	0.329961	0.566906	0.0377401
density	Alabama	0.213929	na	0.747532	0.070261	0.767476	0.685352	0.0839157	0.206258
	Arkansas	0.252442	na	0.636456	0.0497868	0.628118	0.323945	0.788146	0.136342
	California	0.226925	na	0.219433	0.0351723	0.393161	0.639984	0.104792	0.017936
	Connecticut	0.10492	na	0.211392	0.154822	0.198496	0.676443	0.0381482	0.181143
	Florida	0.0472*	Jefferson County	0.00185308	0.238116	0.00206174	0.115595	0.83507	0.00382352
	Georgia	1	na	0.661555	0.463664	0.985588	0.189899	0.969571	0.0205963
	Illinois	0.258508	na	0.640346	0.530607	0.876724	0.55358	0.885275	0.0130299
	Indiana	0.0092*	Union County	0.0038581	0.0822854	0.00310523	<0.0001*	0.0364165	<0.0001*
	Iowa	0.0353*	Jefferson County	0.0874077	0.0131324	0.0260442	0.0416063	0.736644	0.0012*
	Kansas	0.161209	na	0.251746	0.0001*	0.437457	0.681871	0.78731	0.843058
	Kentucky	0.132128	na	0.0425446	0.687456	0.00898494	0.455532	0.489773	0.0497228
	Louisiana	0.536047	na	0.64692	0.934599	0.378514	0.972032	0.639265	0.0539614
	Maine	0.182009	na	0.253784	0.410151	0.562705	0.811118	0.414596	0.44253
	Maryland	0.571931	na	0.690507	0.0602829	0.991383	0.800539	0.52992	0.768968
	Massachusetts	0.53242	na	0.997467	0.039894	0.834677	0.851058	0.109838	0.596576
	Michigan	0.074136	na	0.402011	0.235041	0.455614	0.86696	0.526115	0.0716502
	Minnesota	0.402243	na	0.777469	0.0127342	0.412791	0.907144	0.825991	0.00304828
	Mississippi	0.63054	na	0.285612	0.525699	0.165938	0.7118	0.490088	0.397712
	Missouri	0.309227	na	0.275604	0.443077	0.263468	0.15397	0.304908	0.0141682
	Nebraska	<0.0001*	Douglas County, Sarpy County	0.27747	<0.0001*	0.344309	0.159219	0.199969	0.0001*
	Nevada	0.312307	na	0.355171	0.129249	0.796583	0.575892	0.03408	0.300878
	New Hampshire	0.357833	na	0.68426	0.471105	0.479227	0.950044	0.0626411	0.395849
	New Jersey	0.639769	na	0.0546407	0.46254	0.294787	0.406243	0.150353	0.255728
	New York	0.0891946	na	0.65777	0.202265	0.276607	0.974443	0.0100244	0.0002*
	North Carolina	0.259209	na	0.0150489	0.0219763	0.223415	0.458303	0.149045	0.319362
	Ohio	0.0083*	Harrison County	0.00702091	0.0307162	0.07105	<0.0001*	0.782582	0.0004*
	Oregon	0.473867	na	0.877852	0.401819	0.902366	0.919042	0.320816	0.725505
	Pennsylvania	0.0245*	Montour County	0.0011*	0.0291839	0.00443773	0.00159769	0.678783	0.0004*
	Rhode Island	0.61282	na	0.995617	0.965455	0.943041	0.684693	0.561911	0.542576
	South Carolina	0.550581	na	0.767926	0.50067	0.702132	0.556963	0.311634	0.675514
	Tennessee	0.908841	na	0.19415	0.415124	0.133142	0.411744	0.0641682	0.00489594
	Texas	0.0212*	Marion County	0.00903615	0.403649	0.744823	0.631862	0.918399	0.78663
	Vermont	0.4913	na	0.886599	0.91222	0.720925	0.706994	0.17693	0.107983
	Virginia	0.194336	na	0.76291	0.0109862	0.70605	0.830282	0.494927	0.056149
	West Virginia	0.130592	na	0.0474296	0.618938	0.0347287	0.678879	0.218374	0.0313342
	Wisconsin	0.0867525	na	0.013539	0.197149	0.0246	0.883676	0.858295	0.00201907
